# Supplementary material for: Celecoxib versus placebo as an adjunct to treatment-as-usual in children and youth with obsessive–compulsive disorder: protocol for a single-site randomised quadruple-blind phase II study
Source: PubMed Central journal article supplement — BMJ Open. 2022 Jan 31;12(1):e054296. doi: 10.1136/bmjopen-2021-054296 (PMC8804641; doi:10.1136/bmjopen-2021-054296), 2022-01-31
Supplement: bmjopen-2021-054296.draft_revisions.pdf [file bmjopen-2021-054296.draft_revisions.pdf]

# BMJ Open

BMJ Open is committed to open peer review. As part of this commitment we make the peer review history of every article we publish publicly available.

When an article is published we post the peer reviewers' comments and the authors' responses online. We also post the versions of the paper that were used during peer review. These are the versions that the peer review comments apply to.

The versions of the paper that follow are the versions that were submitted during the peer review process. They are not the versions of record or the final published versions. They should not be cited or distributed as the published version of this manuscript.

BMJ Open is an open access journal and the full, final, typeset and author-corrected version of record of the manuscript is available on our site with no access controls, subscription charges or pay-per-view fees (<http://bmjopen.bmj.com>).

If you have any questions on BMJ Open's open peer review process please email [info.bmjopen@bmj.com](mailto:info.bmjopen@bmj.com)

# BMJ Open

## **Celecoxib versus placebo as an adjunct to treatment-as-usual in children and youth with obsessive-compulsive disorder: Protocol for a single-site randomized quadruple-blind phase II study**

|                               |                                                                                                                                                                                                                                                                                                                                                                                                                                                                                                                                                                                                                                                                                                                                                                                                                                                                                                                                                                                                                                                                                        |
|-------------------------------|----------------------------------------------------------------------------------------------------------------------------------------------------------------------------------------------------------------------------------------------------------------------------------------------------------------------------------------------------------------------------------------------------------------------------------------------------------------------------------------------------------------------------------------------------------------------------------------------------------------------------------------------------------------------------------------------------------------------------------------------------------------------------------------------------------------------------------------------------------------------------------------------------------------------------------------------------------------------------------------------------------------------------------------------------------------------------------------|
| Journal:                      | <i>BMJ Open</i>                                                                                                                                                                                                                                                                                                                                                                                                                                                                                                                                                                                                                                                                                                                                                                                                                                                                                                                                                                                                                                                                        |
| Manuscript ID                 | bmjopen-2021-054296                                                                                                                                                                                                                                                                                                                                                                                                                                                                                                                                                                                                                                                                                                                                                                                                                                                                                                                                                                                                                                                                    |
| Article Type:                 | Protocol                                                                                                                                                                                                                                                                                                                                                                                                                                                                                                                                                                                                                                                                                                                                                                                                                                                                                                                                                                                                                                                                               |
| Date Submitted by the Author: | 09-Jun-2021                                                                                                                                                                                                                                                                                                                                                                                                                                                                                                                                                                                                                                                                                                                                                                                                                                                                                                                                                                                                                                                                            |
| Complete List of Authors:     | Westwell-Roper, Clara; The University of British Columbia Faculty of Medicine, Psychiatry; BC Children's Hospital Research Institute, Best, John; BC Children's Hospital Research Institute<br>Elbe, Dean; BC Children's Hospital; The University of British Columbia Faculty of Medicine<br>MacFadden, Megan; BC Children's Hospital, Department of Psychiatry; The University of British Columbia Faculty of Medicine, Psychiatry<br>Baer, Susan; BC Children's Hospital, Department of Psychiatry; The University of British Columbia Faculty of Medicine, Psychiatry<br>Tucker, Lori; BC Children's Hospital Research Institute; The University of British Columbia Faculty of Medicine, Pediatrics<br>Au, Antony; BC Children's Hospital Research Institute<br>Naqqash, Zainab; BC Children's Hospital Research Institute<br>Lin, Boyee; BC Children's Hospital Research Institute<br>Lu, Cynthia; BC Children's Hospital Research Institute<br>Stewart, S. Evelyn; BC Children's Hospital Research Institute; The University of British Columbia Faculty of Medicine, Psychiatry |
| Keywords:                     | Child & adolescent psychiatry < PSYCHIATRY, Immunology < NATURAL SCIENCE DISCIPLINES, MENTAL HEALTH                                                                                                                                                                                                                                                                                                                                                                                                                                                                                                                                                                                                                                                                                                                                                                                                                                                                                                                                                                                    |
|                               |                                                                                                                                                                                                                                                                                                                                                                                                                                                                                                                                                                                                                                                                                                                                                                                                                                                                                                                                                                                                                                                                                        |

SCHOLARONE™  
Manuscripts

1  
2  
3  
4  
5  
6  
7  
8  
9  
10  
11  
12

## Celecoxib versus placebo as an adjunct to treatment-as-usual in children and youth with obsessive-compulsive disorder: Protocol for a single-site randomized quadruple-blind phase II study

13  
14  
15  
16  
17  
18  
19  
20  
21  
22  
23  
24  
25  
26

Westwell-Roper C<sup>1,2\*</sup>, Best J<sup>2</sup>, Elbe D<sup>3,4</sup>, MacFadden M<sup>1,3</sup>, Baer S<sup>1,3</sup>, Tucker LB<sup>3,5</sup>, Au A<sup>2</sup>, Naqqash Z<sup>2</sup>,  
Lin B<sup>2</sup>, Lu C<sup>2</sup>, Stewart SE<sup>1,2,3,6</sup>

27  
28  
29  
30  
31  
32  
33  
34  
35  
36  
37  
38  
39  
40  
41  
42  
43  
44  
45  
46  
47  
48  
49  
50  
51  
52  
53  
54  
55  
56  
57  
58  
59  
60

<sup>1</sup>Department of Psychiatry, Faculty of Medicine, University of British Columbia, Vancouver, BC, Canada; <sup>2</sup>Provincial OCD Program, BC Children's Hospital Research Institute, Vancouver, BC, Canada; <sup>3</sup>BC Children's Hospital, Vancouver, BC, Canada; <sup>4</sup>Faculty of Pharmaceutical Sciences, University of British Columbia, Vancouver, BC, Canada; <sup>5</sup>Division of Rheumatology, Department of Pediatrics, Faculty of Medicine, University of British Columbia, Vancouver, BC, Canada; <sup>6</sup>Sponsor-Investigator

\*Corresponding author: Clara Westwell-Roper, MD, PhD. Group of Dr. S. Evelyn Stewart, BC Children's Hospital Research Institute. 950 West 28th Avenue, Vancouver, BC V5Z 4H4.  
cwestwellroper@bcchr.ubc.ca.

**Keywords:** Obsessive-compulsive disorder, non-steroidal anti-inflammatory drug, cyclooxygenase inhibitor, randomized-controlled trial, pediatric

**Abbreviations:** AE, adverse event; ALT, alanine aminotransferase; AST, aspartate aminotransferase; ASD, autism spectrum disorder; BMI, body mass index, BCCH, British Columbia Children's Hospital; CGI, clinical global impression; CNS, central nervous system; C&W, Children's and Women's Health Centre; CBC, complete blood count; Cr, creatinine, COX, cyclooxygenase; CY-BOCS, Children's Yale-Brown Obsessive Compulsive Scale (Version I); CY-BOCS II, Children's Yale-Brown Obsessive Compulsive Scale (Version II); DSMB, data safety monitoring board; eCRF, electronic case report form; MDD, major depressive disorder; MINI-Kid, Mini International Neuropsychiatric Interview for Children and Adolescents; NSAID, Non-steroidal anti-inflammatory drug; OCD, obsessive-compulsive disorder; OCI-CV, Obsessive Compulsive Inventory – Child Version; PANS, pediatric acute neuropsychiatric syndrome; PANDAS, pediatric autoimmune disorder associated with streptococcal infections; PGI, patient global impression; PPQ, Participant Perspective Questionnaire; RCT, randomized controlled trial; RA, Research Assistant; REDCap, Research Electronic Data Capture; REB, Research Ethics Board; SMURF, Safety Monitoring Uniform Research Form; SRI, serotonin reuptake inhibitor; SSRI, selective serotonin reuptake inhibitor

## ABSTRACT

**Background:** Cyclooxygenase (COX) enzymes oxidize arachidonic acid to prostaglandins, which modulate neuronal function and inflammation in the central nervous system. Consensus guidelines recommend NSAIDs as an adjunctive approach in adults with obsessive-compulsive disorder (OCD) and in children with acute-onset OCD subtypes. However, there is limited evidence to support this approach. The primary objective of this study is to determine the efficacy of the COX-2-selective inhibitor celecoxib as an adjunct to treatment-as-usual in children and youth with moderate-to-severe OCD.

**Methods:** The Adjunctive CElecoxib in childhood-onset OCD (ACE-OCD) study is a single-centre randomized, quadruple-blind, placebo-controlled superiority trial with two parallel groups: celecoxib 100 mg twice daily and placebo. Target recruitment is 80 participants ages 7-18 with no recent treatment changes. The primary outcome is OCD severity after 12 weeks of treatment, measured by clinician-administered Children's Yale-Brown Obsessive Compulsive Scale (CY-BOCS). Secondary outcomes include CY-BOCS score after 6 weeks; difference in the proportion of participants achieving a clinically meaningful response or remission; mean clinical global impression of severity and improvement after 6 and 12 weeks; and proportion of participants reporting adverse events possibly or probably related to the study intervention. The primary analyses, carried out according to intention-to-treat principles, will compare the celecoxib to placebo group on each outcome of interest, adjusting for baseline scores using analysis of covariance or logistic regression. Participants will be offered a 12-week open-label celecoxib extension and will be invited to participate in an ancillary study for biomarker analyses.

**Ethics and dissemination:** This protocol has been approved by the University of British Columbia Children's and Women's Research Ethics Board and has received a No Objection Letter from Health Canada. The findings will be disseminated in peer-reviewed journals and presentations to multiple stakeholders including patients, parents, and health care providers.

**Trial registration number:** NCT04673578. Open for recruitment.

## STRENGTHS AND LIMITATIONS OF THIS STUDY

- This study is the first randomized, placebo-controlled trial to evaluate the efficacy and safety of adjunctive NSAID therapy in childhood-onset OCD and does not restrict participants to a diagnosis of pediatric acute-onset neuropsychiatric syndrome (PANS) or pediatric autoimmune neuropsychiatric disorder associated with streptococcal infections (PANDAS).
- Study visits may occur virtually and screening blood work can be completed in participants' local communities, increasing accessibility for participants.
- Participants will have the option to consent to an ancillary study involving biosample collection for correlative biology; this will provide preliminary longitudinal data allowing measurement of associations between inflammatory biomarkers and clinical phenotype.
- This study incorporates assessment of participants' and parents' perspectives on participation, including their experience of virtual visits, to inform future studies of psychopharmacologic interventions in this population.
- While heterogeneity of usual therapy may limit power to detect differences between arms, this represents a more pragmatic approach than contemporaneous initiation of a selective serotonin reuptake inhibitor as described in preliminary studies in adults.

## INTRODUCTION

Obsessive-compulsive disorder (OCD) is a common neuropsychiatric condition identified by the World Health Organization as one of the leading causes of worldwide medical disability<sup>1</sup>. It affects 1-3% of the population and places significant burden on patients, families, and healthcare systems<sup>2</sup>. Childhood-onset OCD (CO-OCD) represents a specific subtype with unique epidemiological, etiological, and clinical characteristics<sup>3,4</sup>. Although cognitive behavioural therapy (CBT) and serotonin reuptake inhibitors (SRIs) are effective treatments, there is a critical need to develop novel and augmenting agents for patients with enduring symptoms.

A large body of work suggests an association between infection and an abrupt, early-onset form of OCD, termed pediatric autoimmune disorder associated with streptococcal infections (PANDAS)<sup>5</sup>, as well as pediatric acute neuropsychiatric syndrome (PANS)<sup>6</sup>. Recent epidemiological data suggest that recurrent episodes of infection and inflammation are associated with the development of multiple mental disorders in children<sup>7</sup>, including “classic” OCD<sup>8</sup>. Moreover, patients with autoimmune disorders have higher rates of comorbid OCD compared to the general population<sup>9,10</sup>. A recent cohort study based on Swedish National Register data suggested increased rates of multiple autoimmune diseases among patients with OCD and their first-degree relatives<sup>11</sup>; we have also described higher-than-expected rates of immune-related conditions in individuals with CO-OCD<sup>12</sup>. Positron emission tomography imaging study in adults with OCD has demonstrated increased volume of translocator protein-18 distribution in cortico-striato-thalamo-cortical circuits, implicating widespread microglial activation<sup>13</sup>. It is unclear whether changes in cellular and soluble inflammatory markers represent underlying etiology, a consequence of disease progression, or associated epiphenomena.

Non-steroidal anti-inflammatory drugs (NSAIDs) inhibit cyclooxygenase (COX) enzymes, which catalyze the metabolism of arachidonic acids to prostanoids. COX-2 and its products play an important physiological role in synaptic plasticity and long-term potentiation and may also contribute to neuropathology by enhancing glutamate excitotoxicity, promoting neuronal cell death, and oxidizing endogenous cannabinoids<sup>14,15</sup>. Recent meta-analyses suggest a potential role of adjunctive COX-2 inhibitors in the treatment of depression<sup>16</sup> and first-episode schizophrenia<sup>17,18</sup>. Behavioral effects of COX inhibition may relate not only to anti-inflammatory activity but also to direct effects on neuronal function and synaptic transmission. Consensus guidelines on the use of anti-inflammatory therapy in children with PANDAS suggest NSAIDs as first-line options for patients with mild impairment<sup>19</sup>. However, a recent systematic review of treatment for PANS/PANDAS found insufficient evidence to support this practice<sup>20</sup>. In adults with OCD, two small randomized-controlled trials have suggested modest symptom improvement with celecoxib as an adjunct to fluoxetine or fluvoxamine<sup>21,22</sup>. This raises the possibility that COX-2 inhibition may be effective in a general OCD population<sup>23</sup>. However, no controlled studies to date have tested the effects of COX inhibitors in CO-OCD. The present study will determine the efficacy of the COX-2-selective inhibitor celecoxib as an adjunct to treatment-as-usual in children and youth with moderate-to-severe OCD.

## METHODS AND DESIGN

### Study design

The ACE-OCD trial is a randomised, quadruple-blinded, placebo-controlled, single-site study comparing a 12-week course of twice daily celecoxib with placebo as an adjunct to treatment-as-usual in children and youth with moderate-to-severe OCD between the ages of 7 and 18. The protocol was drafted in accordance with the SPIRIT (Standard Protocol Items: recommendations for Interventional Trials) statement<sup>24</sup>. The trial was registered at ClinicalTrials.gov prior to enrolment (NCT04673578). All

1  
2 parents/guardians participating in the study will give electronically-documented informed consent; child  
3 and youth participants will provide informed assent or consent.  
4

### 5 **Study setting**

6 This is a single-site study based at the British Columbia Children's Hospital (BCCH) Provincial OCD  
7 Program in Vancouver, BC, Canada. Study visits will be conducted virtually, utilizing electronic-consent  
8 and survey platforms through Research Electronic Data Capture (REDCap) and Zoom, an online  
9 videoconference platform that complies with the Personal Information Protection and Electronic  
10 Documents Act and the Personal Health Information Protection Act.  
11  
12

### 13 **Patient selection**

14 Participants will be recruited from BCCH and based on self-referral through community pediatrics,  
15 psychiatry, and psychology practices. Participants may be receiving concurrent pharmacotherapy or  
16 psychotherapy constituting "treatment-as-usual" as long as there have been no changes in the preceding  
17 4 weeks and during the study period. They must have a previous diagnosis of OCD. Refer to Table 1 for  
18 full inclusion and exclusion criteria.  
19  
20

### 21 **Allocation and randomization**

22 Participants will be randomly assigned to either placebo or celecoxib with a 1:1 allocation as per a  
23 computer-generated randomization schedule stratified by baseline CY-BOCS score (16-23 versus  $\geq 24$ )  
24 using permuted blocks of random sizes of 2 and 4. Specific information regarding the allocation sequence  
25 will be stored in a separate document with access restricted to the study's statistician, the Research  
26 Pharmacist, and a Research Assistant (RA) not involved in the study. The block sizes will not be disclosed  
27 to trial implementers.  
28  
29

### 30 **Blinding**

31 Trial participants, investigators, care providers, and outcome assessors will be blinded to treatment  
32 allocation. Placebo capsules will be identical in appearance to celecoxib capsules. Unique randomization  
33 codes will be used for each participant to avoid inadvertent loss of blinding for all participants in the event  
34 that one is unblinded. Data analysis and manuscript writing will be performed after unblinding once data  
35 have been cleaned for primary and secondary endpoints and AEs. Participants will be provided with an  
36 option to be contacted and informed of their allocation at that time. Emergency unblinding will occur only  
37 in exceptional circumstances when required to maintain participant safety – that is, when knowledge of  
38 the actual treatment is essential for further management. The blind will be maintained as far as possible  
39 and will not be disclosed to other study personnel unless required for patient management. Unblinding  
40 will not be a reason for study drug discontinuation.  
41  
42  
43

### 44 **Sample size calculation**

45 The sample size of 80 participants (40 per arm) was estimated on the basis of the primary hypothesis. If  
46 we assume a power to detect a minimally clinically significant between-group difference in CY-BOCS  
47 scores of 2.5 with an SD of 5 (roughly based on the two existing studies of adjunctive celecoxib in  
48 adults<sup>21,22</sup>), a correlation of 0.5 between baseline and final CY-BOCS score, and a sample size of 40  
49 participants per arm, we will have power of 80% to detect a between-group difference using a directional,  
50 one-tailed alpha (celecoxib < placebo) using analysis of covariance. Missing follow-up data due to attrition  
51 will be multiply imputed, allowing us to utilize the full sample size of 80 in this analysis. Our recruitment  
52 target is similar to pilot studies of adjunctive celecoxib in other psychiatric disorders<sup>25</sup>.  
53  
54  
55

### 56 **Interventions**

1  
2 Eligible patients will be randomized to a 12-week course of either celecoxib (generic form) or placebo  
3 containing microcrystalline cellulose. Participants receiving celecoxib with weight between 10-25 kg,  
4 inclusive, will receive 50 mg twice daily; those >25 kg will receive 100 mg twice daily as per FDA-  
5 approved pediatric dosing in children. The placebo capsule is effectively indistinguishable from that of  
6 the drug. Participants will be instructed to take the capsule with food to reduce the risk of gastrointestinal  
7 side effects. Those unable to swallow a capsule may sprinkle the contents on moist food, given similar  
8 pharmacokinetics compared to an intact capsule<sup>26</sup>. Adherence will be documented by capsule count and  
9 adherence questionnaires. Weekly adherence reminders will be provided by email or text. Participants  
10 will also be asked to maintain an electronic diary documenting the first dose, missed doses, AEs, and  
11 changes to the usual way they take the capsule.  
12  
13

### 14 **Participant schedule and follow-up**

15 Prior to their first study visit, parents/guardians of participants who provide informed consent will  
16 complete a full eligibility screening questionnaire followed by a diagnostic interview that includes the  
17 Mini International Neuropsychiatric Interview for Children and Adolescents (MINI-Kid), a short  
18 structured interview that covers a broad range of DSM-5 psychiatric diagnoses in children and  
19 adolescents<sup>27</sup>. Participants and their parents who are eligible to proceed to the first study visit will  
20 complete a demographic/medical questionnaire and participant perspective questionnaire (PPQ) via  
21 REDCap prior to the first study visit.  
22  
23

24  
25 Study visits will proceed according to the flow chart in Figure 1. Measures completed by a study physician  
26 at the first visit include the CY-BOCS<sup>28</sup>; Clinical Global Impression (CGI) scales<sup>29</sup>; review of diagnostic  
27 criteria for PANS/PANDAS, tic disorders, and restricted food intake<sup>6</sup>, clinician treatment expectancy, and  
28 clinician experience of remote study visits. Participants who continue to meet eligibility criteria after  
29 Study Visit 1 will be provided with a requisition for monitoring blood work if not already completed  
30 (CBC, Cr, AST, ALT, electrolytes, pregnancy test). Participants will have the option to consent to  
31 participation in an ancillary study for biosample collection (blood, saliva, buccal swab, and stool) for  
32 future analyses of inflammatory markers.  
33  
34

35 For participants who remain eligible for randomization, the BCCH Pharmacy will dispense the study drug  
36 or placebo according to an allocation sequence provided to them by the team's statistician at a dose based  
37 on the patient's weight. For Visits 2 and 3, parents/participants will again complete a REDCap survey  
38 prior to each visit, including adherence and AE questionnaires. Participants will be provided with a  
39 requisition for blood work to be completed following Visit 3. Participants with ongoing symptoms (CY-  
40 BOCS>8) at Visit 3 will have the option to continue with a 12-week open-label extension with celecoxib,  
41 with a follow-up visit and monitoring blood work at 24 weeks.  
42  
43

## 44 **OUTCOME PARAMETERS AND STATISTICAL ANALYSES**

### 45 **Primary Outcome**

46  
47 The primary outcome is OCD severity as measured by total CY-BOCS score after 12 weeks in the  
48 celecoxib compared to placebo arm, adjusted for baseline OCD severity. This is a more powerful statistical  
49 approach in comparison to analysis of change scores<sup>30</sup>.  
50  
51

### 52 **Secondary Outcomes**

53 Secondary outcomes include the following: (1) OCD severity after 6 weeks of treatment in the celecoxib  
54 compared to placebo arm, adjusted for baseline OCD severity; (2) difference in the proportion of  
55 participants achieving a clinically meaningful response (defined as a 25% reduction in the CY-BOCS  
56 score or CGI-I of 1 or 2 based on previous meta-analyses<sup>31</sup>) after 6 and 12 weeks of treatment in the  
57  
58  
59



1  
2 celecoxib compared to placebo arm; (3) difference in the proportion of participants achieving clinical  
3 remission (CY-BOCS $\leq$ 14) after 6 and 12 weeks of treatment in the celecoxib compared to placebo arm;  
4 (4) mean clinical global impression of severity (CGI-S) after 6 and 12 weeks in the celecoxib compared  
5 to placebo arm, adjusted for baseline OCD severity; (5) mean clinical global impression of improvement  
6 (CGI-I) after 6 and 12 weeks in the celecoxib compared to placebo arm, adjusted for baseline OCD  
7 severity; (6) difference between celecoxib and placebo arms in the proportion of participants reporting  
8 AEs that are possibly, probably, or definitely related to the study intervention.  
9

### 10 11 **Exploratory Outcomes**

12 Exploratory analyses will include determination of the associations among age, sex, race/ethnicity, BMI  
13 percentile, treatment at baseline, severity at baseline, presence/severity of PANS/PANDAS symptoms or  
14 tics at any time point based on clinician assessment, medical/psychiatric comorbidities, time since  
15 diagnosis, scores on parent perspective questionnaire items, clinician treatment expectancy, and the  
16 primary and secondary outcomes. Additional measures of severity will be included in exploratory analyses  
17 and collected at all time points, including self-report and parent-report versions of the CY-BOCS and  
18 Obsessive Compulsive Inventory – Child Version (OCI-CV) (Table 2).  
19  
20

### 21 **Outcome measures**

22 *Children's Yale-Brown Obsessive Compulsive Scale (CY-BOCS)*: OCD severity will be assessed using  
23 the CY-BOCS, a gold-standard clinician report measure<sup>28</sup>. The CY-BOCS is the most widely used  
24 measure of clinician-rated OCD and its psychometric properties including validity and reliability have  
25 been supported across many studies<sup>32</sup>. We have also included additional items in the clinician assessment  
26 forms to allow calculation of a score for CY-BOCS-II, which has been recently validated and may be used  
27 in future studies<sup>33</sup>.  
28  
29

30  
31 *Clinical global impression (CGI)*: The CGI scale includes single item, clinician-rated, 7-point Likert-type  
32 scales of severity and improvement. The CGI-S is a frequently-used measure for assessment of symptom  
33 severity across multiple psychiatric illnesses. Both face-to-face and video scoring are considered valid  
34 outcome measures suitable for use in trials of OCD treatment<sup>34</sup>. The CGI-I typically but not always tracks  
35 with CGI-S<sup>29</sup> and has been used to define treatment response in treatment trials of pediatric OCD<sup>31</sup>.  
36

37  
38 *Participant perspective questionnaire (PPQ)*: This is a study-specific questionnaire to be completed  
39 online by the participant and parent in conjunction with each study visit. Included measures are listed in  
40 Table 2.  
41

42  
43 *Clinician assessment*: In addition to assessment of OCD severity, PANS/PANDAS diagnosis and review  
44 of tic symptoms/severity will be conducted by the clinician at all study visits. This will include CGI  
45 measures for tics and for food intake restriction (a PANS criterion). Clinicians will also complete several  
46 questions related to treatment expectancy and their experience of virtual study visits.  
47

48  
49 *Adverse events*: AEs will be systematically assessed at Study Visits 2 and 3 using a questionnaire  
50 adaptation of the Safety Monitoring Uniform Research Form (SMURF)<sup>35</sup>. The SMURF is an AE-  
51 elicitation tool specifically aimed at pediatric populations, developed by the NIMH-funded Research Units  
52 on Pediatric Psychopharmacology<sup>35</sup>. A checklist will also be included in participant electronic diaries to  
53 allow for standardization of reporting and to facilitate recall when completing the AE Questionnaire prior  
54 to the visit.  
55

56  
57 *Adherence*: Medication adherence questionnaires will be completed on REDCap by participants prior to  
58 Visits 2 and 3 and will be reviewed with the family by the RA and study physician. This will consist of  
59

two questions regarding the frequency with which participants have taken all doses or missed one dose, with the response rated on a visual analogue scale. An open-ended question will be included regarding the reason for any missed doses. Adherence will also be assessed by capsule count at the end of the study.

### **Safety monitoring and interim analysis**

This study will be reviewed by a Data Safety and Monitoring Board (DSMB). An interim analysis of recruitment rates and AEs will be conducted after the first 10 patients or the first year of recruitment. Unblinding of data will occur only at the request of the DSMB by a statistician not directly involved in the conduct of the study. No interim efficacy analysis is planned. Individual participants may be asked to leave the study for their own safety, in which case consensus of at least two study physicians will be required. Individual participants who withdraw from or complete the study will continue follow-up with their regular care providers.

### **Statistical analyses**

Analyses will be carried out according to the intention-to-treat principle such that participants will be analyzed according to the group to which they were randomized regardless of adherence. Descriptive statistics will be conducted on baseline variables to evaluate the characteristics of the total sample and subsamples in each treatment condition. The primary analyses will be conducted on two sets of data. First, the analyses will be conducted on complete case data, which is defined as the set of subjects without missing data on the variables included in the particular statistical model. Second, missing data will be imputed using multivariate imputation by chained equations prior to being submitted to the statistical model. This approach is appropriate when data are missing at random or are missing completely at random<sup>36</sup>. The imputation method for all variables will be semi-parametric predictive mean matching, which restricts imputations to the observed values in the data set. Forty imputed data sets will be created following 40 iterations of a Gibbs sampler for each imputed data set. Proper convergence of the Gibbs sampler will be confirmed by visual inspection of trace plots of imputed variable, with an eye toward proper mixing and the absence of spikes or systematic trends across iterations. The imputation model will include all variables and interactions between variables that will ultimately be included in the primary, secondary and exploratory/subgroup analysis models. Thus, the imputation model will include baseline demographic and clinical characteristics used to form subgroups for exploratory analyses, treatment condition, baseline scores on outcomes measures, as well as observed follow-up scores on the outcomes of interest. Variables derived from other variables already included in the imputation model (e.g., CY-BOCS score  $\leq 14$  versus  $>14$ ) will not be included in the imputation model. Statistical estimates will be pooled over the 40 imputed data sets using the Barnard-Rubin procedure to estimate pooled standard errors and degrees of freedom<sup>37</sup>.

*Primary Analysis:* The primary analyses will compare the celecoxib to the placebo group on the outcome of interest at weeks 6 and 12, adjusting for baseline scores on the outcome, using ANCOVA for continuous outcomes and logistic regression for categorical outcomes. Additionally, baseline CY-BOCS will be included as a covariate in all analyses, even when CY-BOCS is not the outcome variable. ANCOVA produces unbiased treatment effect estimates and less variance in the treatment effect as compared to the commonly-used linear mixed model, resulting in superior statistical power<sup>30</sup>. All continuous outcomes believed to be generated from a Gaussian distribution will be analyzed using this approach.

The primary contrast for this study will be the between-group difference (celecoxib vs. placebo) in CY-BOCS score at 12 weeks, adjusted for baseline CY-BOCS score, using multiply-imputed data and complete case data. The estimated between-group difference using the multiply-imputed data will be considered the primary estimate; the estimated between-group difference using complete case data will be considered secondary. The statistical significance threshold for this analysis will be set at a one-sided

1  
2 alpha = 0.05, to test whether the celecoxib group has lower adjusted 12-week CY-BOCS scores compared  
3 to the placebo group. For this analysis, we will report the between-group point estimate, 95% confidence  
4 value, and p-value to 3 decimal places. A p-value less than 0.001 will be reported as  $p < 0.001$ . Additional  
5 analyses of between-group differences in secondary outcomes and in symptom severity at the midpoint  
6 assessment will be considered descriptive and will be described using point estimates and 95% confidence  
7 intervals.  
8  
9

10 *Secondary Analysis:* Secondary analyses will include analysis of the proportion of patients in each group  
11 who achieve a 25% reduction in CY-BOCS score from baseline or CGI-I of 1 or 2 (treatment response)  
12 and who achieve a CY-BOCS score  $\leq 14$  (remission). Logistic regression will analyze between-group  
13 differences in this binary outcome (achieved  $\geq 25\%$  reduction versus did not), adjusting for baseline CY-  
14 BOCS score. Similarly, logistic regression will examine group differences in a binary AE variable  
15 (experienced at least one AE versus did not), also adjusting for baseline CY-BOCS score. Association  
16 between OCD symptoms, PGI, and treatment expectancy will be estimated using linear regression  
17 modelling with treatment group, age, sex, BMI percentile, race/ethnicity, PANS/PANDAS status, and tic  
18 status as covariates.  
19  
20

21 *Other Analysis:* Data collected during the 12-week extension period will be reported in a descriptive  
22 fashion, e.g., number of observations, percentages, means, and standard deviations.  
23  
24

### 25 **Patient and public involvement**

26 The research question addressed by the study has been informed by discussions with families interested  
27 in trialing NSAID therapy and the current lack of evidence base to inform treatment recommendations.  
28 Feedback from families has been incorporated into trial design, including addition of an open-label phase.  
29 Procedures for recruitment, assessment, BioBank sample collection, outcome assessments, follow-up, and  
30 results dissemination are common to other studies in the BCCH Provincial OCD Program that have  
31 provided both patients and families with an opportunity for input. Because this trial is unique in  
32 incorporating virtual/remote study visits for a pharmacological intervention within a pediatric psychiatric  
33 population in BC, participants' perspectives on their participation may provide critical information  
34 relevant to the design of future studies.  
35  
36  
37  
38

## 39 **ETHICS AND DISSEMINATION**

### 40 **Data collection and confidentiality**

41 All data are handled confidentially and the information in the datasets for analyses is non-identifiable.  
42  
43  
44

### 45 **Ethics**

46 A No Objection Letter was received from Health Canada in January 2021 and the study was approved by  
47 the University of British Columbia / Children's and Women's Health Centre of British Columbia Research  
48 Ethics Board in April 2021. An amendment to include an open-label phase will be submitted in June 2021.  
49  
50

### 51 **Withdrawal**

52 Patients will be informed of their right to withdraw from the study without explanation at any time. In  
53 case of patient withdrawal, they will be asked for permission for prospective collection and later use of  
54 their hospital record data after their withdrawal.  
55

### 56 **Dissemination plan**

1  
2 The findings will be disseminated in peer-reviewed academic journals and presentations to multiple  
3 stakeholders including patients, parents, and health care providers.  
4  
5

## 6 7 **DISCUSSION**

8 This study will be the first to assess the efficacy of celecoxib in pediatric OCD. Multiple lines of evidence  
9 suggest behavioural effects of COX inhibition, which may relate not only to anti-inflammatory activity  
10 but also to direct effects on neuronal function and synaptic transmission. While clinical phenotyping will  
11 identify children meeting criteria for PANS/PANDAS, this work will also bring much-needed attention  
12 to a heterogeneous population of patients with OCD and may inform future trials of immune-modulating  
13 therapies. Participant perspectives on treatment expectancy, outcomes, and trial participation will be used  
14 to inform the design of future studies in this population.  
15

16  
17 ***Rationale for use of a COX-2-selective versus COX-1-selective inhibitor:*** While all NSAIDs appear to  
18 have anti-inflammatory, antipyretic, and analgesic properties attributable to prostaglandin inhibition, they  
19 vary with respect to COX selectivity<sup>38</sup> and may have neuroprotective effects not directly related to their  
20 classic anti-inflammatory activity<sup>39,40</sup>. In the CNS, modulation of glutamate, serotonin, neopinephrine,  
21 and endocannabinoid signalling has been primarily demonstrated with COX-2 rather than COX-1  
22 inhibitors<sup>14,15,41-43</sup>. Other than a negative RCT of naproxen in geriatric depression<sup>44</sup> and a study of adjuvant  
23 aspirin in schizophrenia<sup>45</sup>, few RCTs have evaluated non-selective NSAIDs in primary psychiatric  
24 disorders. Given the significance of different COX isoforms and their unknown relative “potencies” in  
25 the CNS, careful attention must be given to selection and evaluation of specific NSAIDs to better  
26 understand their neurobiology and clinical efficacy. This study uses celecoxib rather than naproxen given  
27 evidence of benefit in adults with OCD and pre-clinical data pointing to modulation of serotonin and  
28 glutamate. Celecoxib is also associated with fewer gastrointestinal side effects in adults.  
29  
30

31  
32 ***Rationale for dosing regimen:*** The US Food and Drug Administration has approved the use of celecoxib  
33 in the pediatric population for the management of juvenile idiopathic arthritis (JIA)<sup>46</sup> and is available in  
34 the US to children from ages two and up based on a non-inferiority study comparing celecoxib with  
35 naproxen<sup>47</sup>. A follow-up registry study from routine clinical practice included 274 children on NSAIDs  
36 and found that AEs were similar for non-selective NSAIDs and celecoxib, and that no serious AEs were  
37 attributed to NSAID use over a mean duration of treatment of 11-13 months<sup>48</sup>. The dosages used were  
38 within the range of those tested in children with JIA over 12 weeks (3-6 mg/kg twice daily)<sup>47</sup>. To avoid  
39 exceeding plasma levels associated with the 6 mg/kg suspension, the FDA-approved capsule dosing will  
40 be used in this study.  
41  
42

43  
44 ***Strengths and limitations of this study:*** While an RCT of naproxen in PANDAS is currently recruiting  
45 (NCT04015596), the present study has broader inclusion criteria based on emerging evidence for  
46 inflammatory dysregulation in “classic” OCD and existing data in adults. The pragmatic approach of  
47 adding celecoxib to treatment-as-usual is a potential strength reflecting typical use in clinical practice.  
48 Because of this, our study population is likely to be more heterogeneous than that of existing adult studies.  
49 It is difficult to predict to what extent and in which direction selection bias will affect the  
50 representativeness of the study population, as in our clinical experience families often consider anti-  
51 inflammatory therapy at all stages and severities of the disorder.  
52

53  
54 A subset of children may benefit from immune-modulating therapies, but there are no validated strategies  
55 for identifying these individuals. This study incorporates biosample collection pre-and post-intervention,  
56 allowing not only for safety monitoring but also for future analyses of pro-inflammatory markers. Given  
57 the paucity of data from interventional trials examining longitudinal markers of inflammation and  
58

1  
2 treatment response in pediatric OCD, this will generate much-needed preliminary data to inform further  
3 studies of immune-related biomarkers. Due to funding limitations, these samples will be allocated for  
4 future analyses.  
5

6  
7 This study incorporates questionnaires aimed at better understanding participants' experiences virtual  
8 study visits, which is a novel format for psychopharmaceutical trials at our centre in the context of the  
9 COVID-19 pandemic and will increase equitable access to opportunities for research participation. We  
10 expect that these data will inform the design of future studies incorporating remote research visits and  
11 clinical care.  
12

### 13 **CONCLUSIONS**

14 NSAIDs are common in clinical practice and referenced in both adult and pediatric treatment guidelines  
15 for OCD, but no controlled studies have evaluated the effects of COX inhibitors in childhood-onset OCD.  
16 This study will be the first to assess the efficacy and safety of adjunctive celecoxib in this population and  
17 will inform clinical management of children and youth with OCD.  
18  
19  
20  
21  
22  
23  
24  
25  
26  
27  
28  
29  
30  
31  
32  
33  
34  
35  
36  
37  
38  
39  
40  
41  
42  
43  
44  
45  
46  
47  
48  
49  
50  
51  
52  
53  
54  
55  
56  
57  
58  
59  
60

1  
2  
3  
4  
5  
6  
7  
8  
9  
10  
11  
12  
13  
14  
15  
16  
17  
18  
19  
20  
21  
22  
23  
24  
25  
26  
27  
28  
29  
30  
31  
32  
33  
34  
35  
36  
37  
38  
39  
40  
41  
42  
43  
44  
45  
46  
47  
48  
49  
50  
51  
52  
53  
54  
55  
56  
57  
58  
59  
60  
**REFERENCES**

1. Murray CJ, Lopez AD. Global mortality, disability, and the contribution of risk factors: Global Burden of Disease Study. *Lancet* 1997;349(9063):1436-42. doi: 10.1016/S0140-6736(96)07495-8
2. Hollander E, Doernberg E, Shavitt R, et al. The cost and impact of compulsivity: A research perspective. *Eur Neuropsychopharmacol* 2016;26(5):800-9. doi: 10.1016/j.euroneuro.2016.02.006
3. do Rosario-Campos MC, Leckman JF, Curi M, et al. A family study of early-onset obsessive-compulsive disorder. *Am J Med Genet B Neuropsychiatr Genet* 2005;136B(1):92-7. doi: 10.1002/ajmg.b.30149
4. Chabane N, Delorme R, Millet B, et al. Early-onset obsessive-compulsive disorder: a subgroup with a specific clinical and familial pattern? *J Child Psychol Psychiatry* 2005;46(8):881-7. doi: 10.1111/j.1469-7610.2004.00382.x
5. Swedo SE, Leonard HL, Garvey M, et al. Pediatric autoimmune neuropsychiatric disorders associated with streptococcal infections: clinical description of the first 50 cases. *Am J Psychiatry* 1998;155(2):264-71. doi: 10.1176/ajp.155.2.264
6. Chang K, Frankovich J, Cooperstock M, et al. Clinical evaluation of youth with pediatric acute-onset neuropsychiatric syndrome (PANS): recommendations from the 2013 PANS Consensus Conference. *J Child Adolesc Psychopharmacol* 2015;25(1):3-13. doi: 10.1089/cap.2014.0084
7. Kohler-Forsberg O, Petersen L, Gasse C, et al. A Nationwide Study in Denmark of the Association Between Treated Infections and the Subsequent Risk of Treated Mental Disorders in Children and Adolescents. *JAMA Psychiatry* 2019;76(3):271-79. doi: 10.1001/jamapsychiatry.2018.3428
8. Orlovska S, Vestergaard CH, Bech BH, et al. Association of Streptococcal Throat Infection With Mental Disorders: Testing Key Aspects of the PANDAS Hypothesis in a Nationwide Study. *JAMA Psychiatry* 2017;74(7):740-46. doi: 10.1001/jamapsychiatry.2017.0995 [published Online First: 2017/05/26]
9. Slattery MJ, Dubbert BK, Allen AJ, et al. Prevalence of obsessive-compulsive disorder in patients with systemic lupus erythematosus. *J Clin Psychiatry* 2004;65(3):301-6.
10. Hounie AG, Pauls DL, do Rosario-Campos MC, et al. Obsessive-compulsive spectrum disorders and rheumatic fever: a family study. *Biol Psychiatry* 2007;61(3):266-72. doi: 10.1016/j.biopsych.2006.02.021
11. Mataix-Cols D, Frans E, Perez-Vigil A, et al. A total-population multigenerational family clustering study of autoimmune diseases in obsessive-compulsive disorder and Tourette's/chronic tic disorders. *Mol Psychiatry* 2017 doi: 10.1038/mp.2017.215
12. Westwell-Roper C, Williams KA, Samuels J, et al. Immune-Related Comorbidities in Childhood-Onset Obsessive Compulsive Disorder: Lifetime Prevalence in the Obsessive Compulsive Disorder Collaborative Genetics Association Study. *J Child Adolesc Psychopharmacol* 2019;29(8):615-24. doi: 10.1089/cap.2018.0140
13. Attwells S, Setiawan E, Wilson AA, et al. Inflammation in the Neurocircuitry of Obsessive-Compulsive Disorder. *JAMA Psychiatry* 2017;74(8):833-40. doi: 10.1001/jamapsychiatry.2017.1567
14. Yang H, Chen C. Cyclooxygenase-2 in synaptic signaling. *Curr Pharm Des* 2008;14(14):1443-51. doi: 10.2174/138161208784480144
15. Chen C, Magee JC, Bazan NG. Cyclooxygenase-2 regulates prostaglandin E2 signaling in hippocampal long-term synaptic plasticity. *J Neurophysiol* 2002;87(6):2851-7. doi: 10.1152/jn.2002.87.6.2851

16. Faridhosseini F, Sadeghi R, Farid L, et al. Celecoxib: a new augmentation strategy for depressive mood episodes. A systematic review and meta-analysis of randomized placebo-controlled trials. *Hum Psychopharmacol* 2014;29(3):216-23. doi: 10.1002/hup.2401
17. Marini S, De Berardis D, Vellante F, et al. Celecoxib Adjunctive Treatment to Antipsychotics in Schizophrenia: A Review of Randomized Clinical Add-On Trials. *Mediators Inflamm* 2016;2016(1):3476240-8.
18. Zheng W, Cai D-B, Yang X-H, et al. Adjunctive celecoxib for schizophrenia: A meta-analysis of randomized, double-blind, placebo-controlled trials. *J Psychiatr Res* 2017;92:139-46.
19. Thienemann M, Murphy T, Leckman J, et al. Clinical Management of Pediatric Acute-Onset Neuropsychiatric Syndrome: Part I-Psychiatric and Behavioral Interventions. *J Child Adolesc Psychopharmacol* 2017;27(7):566-73. doi: 10.1089/cap.2016.0145
20. Sagra S, Hesselmark E, Bejerot S. Treatment of PANDAS and PANS: a systematic review. *Neurosci Biobehav Rev* 2018;86:51-65. doi: 10.1016/j.neubiorev.2018.01.001
21. Sayyah M, Boostani H, Pakseresht S, et al. A preliminary randomized double-blind clinical trial on the efficacy of celecoxib as an adjunct in the treatment of obsessive-compulsive disorder. *Psychiatry Res* 2011;189(3):403-6. doi: 10.1016/j.psychres.2011.01.019
22. Shalbafan M, Mohammadinejad P, Shariat SV, et al. Celecoxib as an Adjuvant to Fluvoxamine in Moderate to Severe Obsessive-compulsive Disorder: A Double-blind, Placebo-controlled, Randomized Trial. *Pharmacopsychiatry* 2015;48(4-5):136-40. doi: 10.1055/s-0035-1549929
23. Katzman MA, Bleau P, Blier P, et al. Canadian clinical practice guidelines for the management of anxiety, posttraumatic stress and obsessive-compulsive disorders. *BMC Psychiatry* 2014;14 Suppl 1:S1. doi: 10.1186/1471-244X-14-S1-S1
24. Chan AW, Tetzlaff JM, Gotzsche PC, et al. SPIRIT 2013 explanation and elaboration: guidance for protocols of clinical trials. *BMJ* 2013;346:e7586. doi: 10.1136/bmj.e7586
25. Sethi R, Gomez-Coronado N, Walker AJ, et al. Neurobiology and Therapeutic Potential of Cyclooxygenase-2 (COX-2) Inhibitors for Inflammation in Neuropsychiatric Disorders. *Front Psychiatry* 2019;10:605. doi: 10.3389/fpsy.2019.00605
26. Krishnaswami S, Hutmacher MM, Robbins JL, et al. Dosing celecoxib in pediatric patients with juvenile rheumatoid arthritis. *J Clin Pharmacol* 2012;52(8):1134-49. doi: 10.1177/0091270011412184
27. Sheehan DV, Sheehan KH, Shytle RD, et al. Reliability and validity of the Mini International Neuropsychiatric Interview for Children and Adolescents (MINI-KID). *J Clin Psychiatry* 2010;71(3):313-26. doi: 10.4088/JCP.09m05305whi
28. Goodman WK, Price LH, Rasmussen SA, et al. The Yale-Brown Obsessive Compulsive Scale. I. Development, use, and reliability. *Arch Gen Psychiatry* 1989;46(11):1006-11.
29. Busner J, Targum SD. The clinical global impressions scale: applying a research tool in clinical practice. *Psychiatry (Edgmont)* 2007;4(7):28-37.
30. O'Connell NS, Dai L, Jiang Y, et al. Methods for Analysis of Pre-Post Data in Clinical Research: A Comparison of Five Common Methods. *J Biom Biostat* 2017;8(1):1-8. doi: 10.4172/2155-6180.1000334
31. McGuire JF, Piacentini J, Lewin AB, et al. A Meta-Analysis of Cognitive Behavior Therapy and Medication for Child Obsessive-Compulsive Disorder: Moderators of Treatment Efficacy, Response, and Remission. *Depress Anxiety* 2015;32(8):580-93. doi: 10.1002/da.22389
32. Rapp AM, Bergman RL, Piacentini J, et al. Evidence-Based Assessment of Obsessive-Compulsive Disorder. *J Cent Nerv Syst Dis* 2016;8:13-29. doi: 10.4137/JCNSD.S38359
33. Storch EA, McGuire JF, Wu MS, et al. Development and Psychometric Evaluation of the Children's Yale-Brown Obsessive-Compulsive Scale Second Edition. *J Am Acad Child Adolesc Psychiatry* 2019;58(1):92-98. doi: 10.1016/j.jaac.2018.05.029 [published Online First: 2018/12/24]

34. Bourredjem A, Pelissolo A, Rotge JY, et al. A video Clinical Global Impression (CGI) in obsessive compulsive disorder. *Psychiatry Res* 2011;186(1):117-22. doi: 10.1016/j.psychres.2010.06.021
35. Greenhill LL, Vitiello B, Fisher P, et al. Comparison of increasingly detailed elicitation methods for the assessment of adverse events in pediatric psychopharmacology. *J Am Acad Child Adolesc Psychiatry* 2004;43(12):1488-96. doi: 10.1097/01.chi.0000142668.29191.13
36. van Buuren S, Groothuis-Oudshoorn K. mice: Multivariate Imputation by Chained Equations in R. *Journal of Statistical Software* 2011;45(3):1. doi: 10.18637/jss.v045.i03
37. Barnard J, Rubin DB. Small-Sample Degrees of Freedom with Multiple Imputation. *Biometrika* 1999;86(4):948-55.
38. Gan TJ. Diclofenac: an update on its mechanism of action and safety profile. *Curr Med Res Opin* 2010;26(7):1715-31. doi: 10.1185/03007995.2010.486301
39. Calvo-Rodriguez M, Nunez L, Villalobos C. Non-steroidal anti-inflammatory drugs (NSAIDs) and neuroprotection in the elderly: a view from the mitochondria. *Neural Regen Res* 2015;10(9):1371-2. doi: 10.4103/1673-5374.165219
40. Diaz-Gonzalez F, Sanchez-Madrid F. NSAIDs: learning new tricks from old drugs. *Eur J Immunol* 2015;45(3):679-86. doi: 10.1002/eji.201445222
41. Lin T-Y, Lu C-W, Wang C-C, et al. Cyclooxygenase 2 inhibitor celecoxib inhibits glutamate release by attenuating the PGE2/EP2 pathway in rat cerebral cortex endings. *J Pharmacol Exp Ther* 2014;351(1):134-45.
42. Sandrini M, Vitale G, Pini LA. Effect of rofecoxib on nociception and the serotonin system in the rat brain. *Inflamm Res* 2002;51(3):154-9.
43. Johansson D, Falk A, Marcus MM, et al. Celecoxib enhances the effect of reboxetine and fluoxetine on cortical noradrenaline and serotonin output in the rat. *Prog Neuropsychopharmacol Biol Psychiatry* 2012;39(1):143-8. doi: 10.1016/j.pnpbp.2012.06.003
44. Fields C, Drye L, Vaidya V, et al. Celecoxib or naproxen treatment does not benefit depressive symptoms in persons age 70 and older: findings from a randomized controlled trial. *Am J Geriatr Psychiatry* 2012;20(6):505-13. doi: 10.1097/JGP.0b013e318227f4da
45. Laan W, Grobbee DE, Selten JP, et al. Adjuvant aspirin therapy reduces symptoms of schizophrenia spectrum disorders: results from a randomized, double-blind, placebo-controlled trial. *J Clin Psychiatry* 2010;71(5):520-7. doi: 10.4088/JCP.09m05117yel
46. Young D. FDA advisers endorse Celebrex for juvenile rheumatoid arthritis: lack of studies in children raises safety concerns. *Am J Health Syst Pharm* 2007;64(1):11-2. doi: 10.2146/news070001
47. Foeldvari I, Szer IS, Zemel LS, et al. A prospective study comparing celecoxib with naproxen in children with juvenile rheumatoid arthritis. *J Rheumatol* 2009;36(1):174-82. doi: 10.3899/jrheum.080073
48. Sobel RE, Lovell DJ, Brunner HI, et al. Safety of celecoxib and nonselective nonsteroidal anti-inflammatory drugs in juvenile idiopathic arthritis: results of the Phase 4 registry. *Pediatr Rheumatol Online J* 2014;12:29. doi: 10.1186/1546-0096-12-29
49. Stewart SE, Stack DE, Farrell C, et al. Effectiveness of intensive residential treatment (IRT) for severe, refractory obsessive-compulsive disorder. *J Psychiatr Res* 2005;39(6):603-9. doi: 10.1016/j.jpsychires.2005.01.004
50. Murphy TK, Patel PD, McGuire JF, et al. Characterization of the pediatric acute-onset neuropsychiatric syndrome phenotype. *J Child Adolesc Psychopharmacol* 2015;25(1):14-25. doi: 10.1089/cap.2014.0062
51. Forrest CB, Bevans KB, Pratiwadi R, et al. Development of the PROMIS (R) pediatric global health (PGH-7) measure. *Qual Life Res* 2014;23(4):1221-31. doi: 10.1007/s11136-013-0581-8



- 1  
2 52. Mara CA, Kashikar-Zuck S, Cunningham N, et al. Development and Psychometric Evaluation of the  
3 PROMIS Pediatric Pain Intensity Measure in Children and Adolescents with Chronic Pain. *J*  
4 *Pain* 2020 doi: 10.1016/j.jpain.2020.04.001  
5  
6 53. Lewin AB, Peris TS, Lindsey Bergman R, et al. The role of treatment expectancy in youth receiving  
7 exposure-based CBT for obsessive compulsive disorder. *Behav Res Ther* 2011;49(9):536-43.  
8 doi: 10.1016/j.brat.2011.06.001  
9  
10 54. De Nadai A, Nagpal PS, Piacentini J, et al. Contemporary models of pediatric obsessive-compulsive  
11 disorder: An evaluation with a large clinical sample. *Psychiatry Res* 2015;229(1-2):620-2. doi:  
12 10.1016/j.psychres.2015.03.034 [published Online First: 2015/05/25]  
13  
14 55. Foa EB, Coles M, Huppert JD, et al. Development and validation of a child version of the obsessive  
15 compulsive inventory. *Behav Ther* 2010;41(1):121-32. doi: 10.1016/j.beth.2009.02.001  
16 [published Online First: 2010/02/23]  
17  
18 56. Pflugeisen BM, Rebar S, Reedy A, et al. Assessment of clinical trial participant patient satisfaction:  
19 a call to action. *Trials* 2016;17(1):483. doi: 10.1186/s13063-016-1616-6  
20  
21  
22  
23  
24  
25  
26  
27  
28  
29  
30  
31  
32  
33  
34  
35  
36  
37  
38  
39  
40  
41  
42  
43  
44  
45  
46  
47  
48  
49  
50  
51  
52  
53  
54  
55  
56  
57  
58  
59  
60

## ACKNOWLEDGEMENTS

The authors gratefully acknowledge clinical trial support provided by the BC Children's Hospital Clinical Research Support Unit, including consultation on study design and methodology by Peter Subrt and Jennifer Claydon. We also thank BCCH Research Pharmacist Erin Adams, Delta Prescriptions Inc. Pharmacist Michael Millman, and BCCH Clinical Laboratory/BioBank staff Veronica Chow and Vi Nguyen for input on protocol design and implementation.

## AUTHORS' CONTRIBUTIONS

CWR drafted the initial protocol under the supervision of SES, who revised for significant content. JB created the statistical analysis plan. MM, SB, DE, and LBT provided clinical input into study design and monitoring. AA, ZN, BL, and CL drafted subsections of the initial protocol and facilitated REB submission. All authors revised the protocol and approved of the final version to be submitted.

## FUNDING STATEMENT

This work is supported by an International OCD Foundation Young Investigator Award to CWR.

## COMPETING INTERESTS

The authors declare that the research was conducted in the absence of any commercial or financial relationships that could be construed as a potential conflict of interest.

1  
2  
3  
4  
5  
6  
7  
8  
9  
10  
11  
12  
13  
14  
15  
16  
17  
18  
19  
20  
21  
22  
23  
24  
25  
26  
27  
28  
29  
30  
31  
32  
33  
34  
35  
36  
37  
38  
39  
40  
41  
42  
43  
44  
45  
46  
47  
48  
49  
50  
51  
52  
53  
54  
55  
56  
57  
58  
59  
60

## TABLES

**Table 1.** Inclusion and exclusion criteria.

| Criterion | Items                                                                                                                                                                                                                                                                                                                                                                                                                                                                                                                                                                                                                                                                                                                                                                                                                                                                                                                                                                                                                                                                                                                                                                                                                                                                                                                                                                                                                                                                                                                                                                                                                                                                                                                                                                                                                                                                                                                                                                                                                                                                                                                                                                                                                                                                                                                                                                                                                                                                                                                                                                                                                                                                                                                                                                                                                                                                     |
|-----------|---------------------------------------------------------------------------------------------------------------------------------------------------------------------------------------------------------------------------------------------------------------------------------------------------------------------------------------------------------------------------------------------------------------------------------------------------------------------------------------------------------------------------------------------------------------------------------------------------------------------------------------------------------------------------------------------------------------------------------------------------------------------------------------------------------------------------------------------------------------------------------------------------------------------------------------------------------------------------------------------------------------------------------------------------------------------------------------------------------------------------------------------------------------------------------------------------------------------------------------------------------------------------------------------------------------------------------------------------------------------------------------------------------------------------------------------------------------------------------------------------------------------------------------------------------------------------------------------------------------------------------------------------------------------------------------------------------------------------------------------------------------------------------------------------------------------------------------------------------------------------------------------------------------------------------------------------------------------------------------------------------------------------------------------------------------------------------------------------------------------------------------------------------------------------------------------------------------------------------------------------------------------------------------------------------------------------------------------------------------------------------------------------------------------------------------------------------------------------------------------------------------------------------------------------------------------------------------------------------------------------------------------------------------------------------------------------------------------------------------------------------------------------------------------------------------------------------------------------------------------------|
| Inclusion | <ol style="list-style-type: none"> <li>1. Age 7-18 years</li> <li>2. Resident of British Columbia</li> <li>3. DSM-5 diagnosis of OCD based on (a) history of prior clinician assessment and (b) standardized interview</li> <li>4. Children's Yale-Brown Obsessive Compulsive Scale (CY-BOCS) score <math>\geq 16</math> (moderate to severe)</li> <li>5. Able to take medication twice daily in capsule form (in whole form or sprinkled contents)</li> <li>6. Negative pregnancy test (either serum or urine) in participants with child-bearing potential</li> <li>7. Use of highly effective and/or double barrier contraception, or abstinence, in participants with child-bearing potential</li> </ol>                                                                                                                                                                                                                                                                                                                                                                                                                                                                                                                                                                                                                                                                                                                                                                                                                                                                                                                                                                                                                                                                                                                                                                                                                                                                                                                                                                                                                                                                                                                                                                                                                                                                                                                                                                                                                                                                                                                                                                                                                                                                                                                                                              |
| Exclusion | <ol style="list-style-type: none"> <li>1. Lifetime diagnosis of autism spectrum disorder, bipolar disorder, psychotic disorder, substance-use disorder, intellectual disability, significant head injury causing loss of consciousness, renal disease, liver disease, gastrointestinal bleeding, peptic ulcer disease, inflammatory bowel disease, severe or uncontrolled asthma, bleeding disorders, heart disease, heart failure, or hypertension</li> <li>2. Current major depressive episode, acute psychosis, active substance use, suicidality, or restriction of fluid intake</li> <li>3. Pregnant or breastfeeding during the study period</li> <li>4. Active infection or antibiotic treatment at baseline</li> <li>5. Allergy to celecoxib, sulfonamide compounds, or NSAIDs, including aspirin</li> <li>6. Current or previous regular use of immune-modulating therapies for treatment of OCD symptoms, at an effective anti-inflammatory dose (including NSAIDs, corticosteroids, or biologics)</li> <li>7. Use of NSAIDs at any dose at a frequency <math>\geq 3</math> times per week during the 2 months prior to randomization</li> <li>8. Current use of corticosteroids (IV, oral, inhaled, intranasal, or high-potency topical)</li> <li>9. Concurrent use of CYP2C9 inhibitors fluconazole, amiodarone, oxandrolone or methotrexate; CYP2C9 inducers including rifampin and phenobarbital; or any other drug that may interact with celecoxib and, in the opinion of study physicians, represents a potential safety risk</li> <li>10. Poor CYP2C9 metabolizer (i.e. CYP2C9*3/*3 genotype) based on clinical suspicion or previous genotyping</li> <li>11. Abnormality identified on baseline serology including leukocytosis, leukopenia, thrombocytopenia, anemia, abnormal renal function (Cr <math>&gt; 1.5</math> x upper limit of normal), or abnormal liver function (ALT, ALP, or AST <math>&gt; 1.5</math>x upper limit of normal)</li> <li>12. New medication started in the 10 weeks prior to baseline, or change in dose in the 4 weeks prior to baseline</li> <li>13. Changes in CBT or other psychotherapy in the 4 weeks prior to baseline (i.e. change in regular frequency, modality, or care provider)</li> <li>14. Notable other treatment changes during the study period (either pharmacotherapy or psychotherapy)</li> <li>15. No regular physician (family doctor or specialist) providing usual medical care</li> <li>16. Participant/parents unable to provide informed consent or assent or participate in self-care, adverse event (AE) reporting, or follow-up assessments</li> <li>17. Inability to have blood pressure measured within 2 months prior to enrollment (either on-site at BCCH or by a primary care provider)</li> <li>18. Intention of pregnancy in participants with child-bearing potential</li> </ol> |

**Table 2.** Description of measures included in the parent/participant perspective questionnaire.

| Measure                                                                                               | Outcome                                                                                                                                                                                                                                          |
|-------------------------------------------------------------------------------------------------------|--------------------------------------------------------------------------------------------------------------------------------------------------------------------------------------------------------------------------------------------------|
| Patient/Parent Global Impression scales for severity and improvement (PGI-S and PGI-I)                | Severity and improvement in OCD and tic symptoms, based on a standard 7-point Likert scale derived from the Clinician Global Impression scales <sup>49</sup> .                                                                                   |
| PANS Rating Scale                                                                                     | Severity and change in PANS/PANDAS symptoms <sup>50</sup>                                                                                                                                                                                        |
| National Institutes of Health PROMIS measures                                                         | Patient-reported measures of (a) global health, and (b) pain intensity, including 8 items overall <sup>51,52</sup> .                                                                                                                             |
| Treatment expectancy                                                                                  | Two items assuming assignment of the participant to either placebo or active drug . Rated on a 7-point Likert scale, previously linked with treatment response and lower attrition in a clinical trial of CBT for youth with OCD <sup>53</sup> . |
| Self-reported OCD severity                                                                            | Self-report CY-BOCS, combining scores for obsessions and compulsions to generate a total score out of 20, consistent with recommendations based on a recent study of CY-BOCS construct validity <sup>54</sup> .                                  |
| Self-report and parent-report versions of the Obsessive Compulsive Inventory – Child Version (OCI-CV) | 21-item self-report measure that assesses obsessive compulsive symptoms in children and adolescents aged 7 to 17 years over the preceding month <sup>55</sup> .                                                                                  |
| Post-visit questionnaire items                                                                        | Likert-scale and open-ended items querying participant experiences with virtual visits and trial participation using, based on previous work but tailored to this current study <sup>56</sup> .                                                  |

FIGURE 1

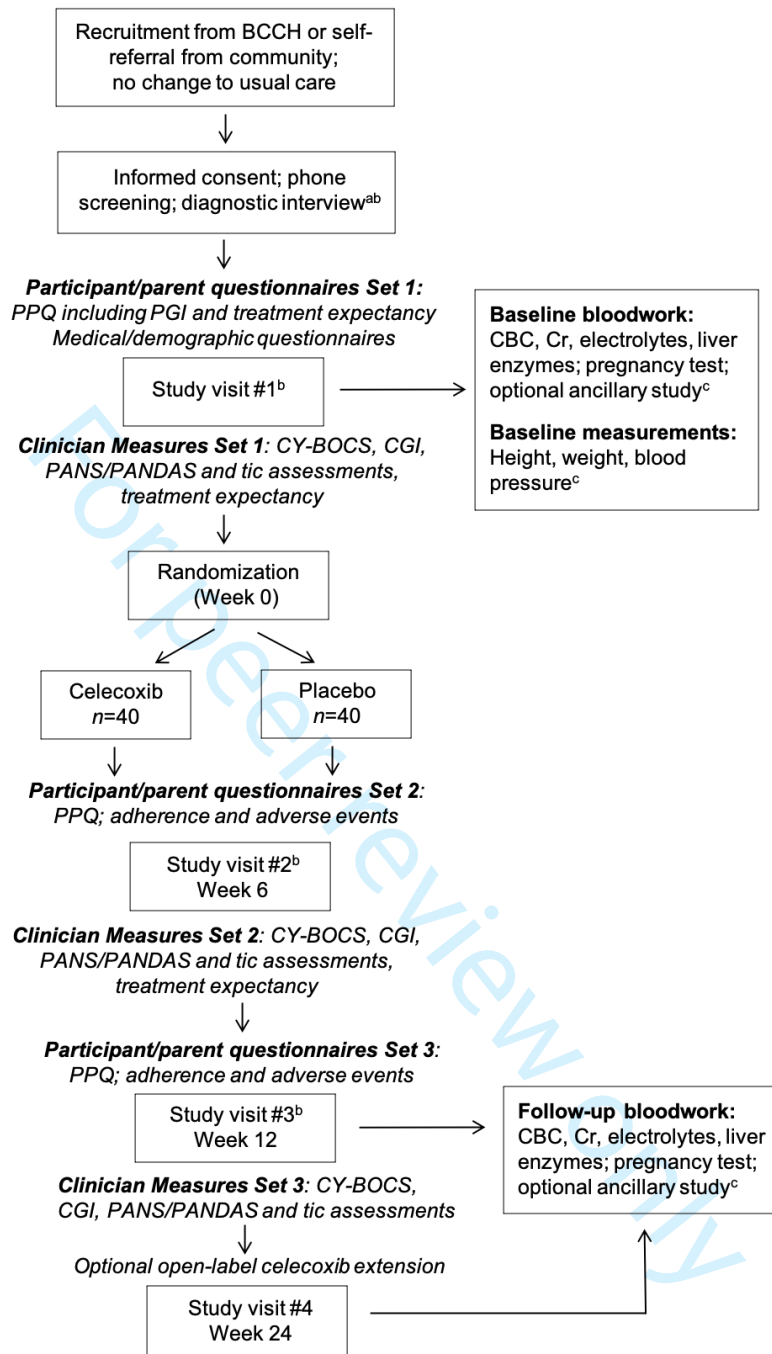

**Figure 1.** Flow diagram of study visits and assessments

<sup>a</sup> MINI-Kid diagnostic interview administered by phone with the participant and parent present.

<sup>b</sup>Screening and study visits may be conducted virtually according to patient preference and current COVID-19 restrictions.

<sup>c</sup>Height, weight, and blood pressure will be determined either on-site or by a participant's regular care provider.

<sup>d</sup>Participants will inform study staff of the date and time of their first dose. Weekly reminders regarding compliance and completion of the participant e-diary as required will be sent via email, phone, or text according to participant preference and consent.

# Reporting checklist for protocol of a clinical trial.

Based on the SPIRIT guidelines.

*Note that the main protocol for this study includes all items. This manuscript due to word count limitations includes only the following. For review purposes, refer to main SPIRIT checklist and protocol for further details.*

|                                                         |                     | Reporting Item                                                                                                                                                                             | Page Number           |
|---------------------------------------------------------|---------------------|--------------------------------------------------------------------------------------------------------------------------------------------------------------------------------------------|-----------------------|
| <b>Administrative information</b>                       |                     |                                                                                                                                                                                            |                       |
| Title                                                   | <a href="#">#1</a>  | Descriptive title identifying the study design, population, interventions, and, if applicable, trial acronym                                                                               | 1                     |
| Trial registration                                      | <a href="#">#2a</a> | Trial identifier and registry name. If not yet registered, name of intended registry                                                                                                       | 1                     |
| Trial registration: data set                            | <a href="#">#2b</a> | All items from the World Health Organization Trial Registration Data Set                                                                                                                   | NA (in main protocol) |
| Protocol version                                        | <a href="#">#3</a>  | Date and version identifier                                                                                                                                                                | NA (in main protocol) |
| Funding                                                 | <a href="#">#4</a>  | Sources and types of financial, material, and other support                                                                                                                                | 16                    |
| Roles and responsibilities: contributorship             | <a href="#">#5a</a> | Names, affiliations, and roles of protocol contributors                                                                                                                                    | 16                    |
| Roles and responsibilities: sponsor contact information | <a href="#">#5b</a> | Name and contact information for the trial sponsor                                                                                                                                         | NA (in main protocol) |
| Roles and responsibilities: sponsor and funder          | <a href="#">#5c</a> | Role of study sponsor and funders, if any, in study design; collection, management, analysis, and interpretation of data; writing of the report; and the decision to submit the report for | 16                    |

publication, including whether they will have ultimate authority over any of these activities

Roles and responsibilities: committees [#5d](#) Composition, roles, and responsibilities of the coordinating centre, steering committee, endpoint adjudication committee, data management team, and other individuals or groups overseeing the trial, if applicable (see Item 21a for data monitoring committee) NA (in main protocol)

## Introduction

Background and rationale [#6a](#) Description of research question and justification for undertaking the trial, including summary of relevant studies (published and unpublished) examining benefits and harms for each intervention 4

Background and rationale: choice of comparators [#6b](#) Explanation for choice of comparators 4

Objectives [#7](#) Specific objectives or hypotheses 4

Trial design [#8](#) Description of trial design including type of trial (eg, parallel group, crossover, factorial, single group), allocation ratio, and framework (eg, superiority, equivalence, non-inferiority, exploratory) 4

## Methods: Participants, interventions, and outcomes

Study setting [#9](#) Description of study settings (eg, community clinic, academic hospital) and list of countries where data will be collected. Reference to where list of study sites can be obtained 5

Eligibility criteria [#10](#) Inclusion and exclusion criteria for participants. If applicable, eligibility criteria for study centres and individuals who will perform the interventions (eg, surgeons, psychotherapists) Table 1

Interventions: description [#11a](#) Interventions for each group with sufficient detail to allow replication, including how and when they will be administered 6

|    |                              |                      |                                                                    |             |
|----|------------------------------|----------------------|--------------------------------------------------------------------|-------------|
| 1  | Interventions:               | <a href="#">#11b</a> | Criteria for discontinuing or modifying allocated interventions    | NA (in      |
| 2  | modifications                |                      | for a given trial participant (eg, drug dose change in response to | main        |
| 3  |                              |                      | harms, participant request, or improving / worsening disease)      | protocol)   |
| 4  |                              |                      |                                                                    |             |
| 5  |                              |                      |                                                                    |             |
| 6  | Interventions:               | <a href="#">#11c</a> | Strategies to improve adherence to intervention protocols, and     | NA (in      |
| 7  | adherence                    |                      | any procedures for monitoring adherence (eg, drug tablet           | main        |
| 8  |                              |                      | return; laboratory tests)                                          | protocol)   |
| 9  |                              |                      |                                                                    |             |
| 10 |                              |                      |                                                                    |             |
| 11 | Interventions:               | <a href="#">#11d</a> | Relevant concomitant care and interventions that are permitted     | 5           |
| 12 | concomitant care             |                      | or prohibited during the trial                                     |             |
| 13 |                              |                      |                                                                    |             |
| 14 |                              |                      |                                                                    |             |
| 15 | Outcomes                     | <a href="#">#12</a>  | Primary, secondary, and other outcomes, including the specific     | 6-7         |
| 16 |                              |                      | measurement variable (eg, systolic blood pressure), analysis       |             |
| 17 |                              |                      | metric (eg, change from baseline, final value, time to event),     |             |
| 18 |                              |                      | method of aggregation (eg, median, proportion), and time point     |             |
| 19 |                              |                      | for each outcome. Explanation of the clinical relevance of         |             |
| 20 |                              |                      | chosen efficacy and harm outcomes is strongly recommended          |             |
| 21 |                              |                      |                                                                    |             |
| 22 |                              |                      |                                                                    |             |
| 23 |                              |                      |                                                                    |             |
| 24 |                              |                      |                                                                    |             |
| 25 | Participant timeline         | <a href="#">#13</a>  | Time schedule of enrolment, interventions (including any run-      | 6, Figure 1 |
| 26 |                              |                      | ins and washouts), assessments, and visits for participants. A     |             |
| 27 |                              |                      | schematic diagram is highly recommended (see Figure)               |             |
| 28 |                              |                      |                                                                    |             |
| 29 |                              |                      |                                                                    |             |
| 30 | Sample size                  | <a href="#">#14</a>  | Estimated number of participants needed to achieve study           | 5           |
| 31 |                              |                      | objectives and how it was determined, including clinical and       |             |
| 32 |                              |                      | statistical assumptions supporting any sample size calculations    |             |
| 33 |                              |                      |                                                                    |             |
| 34 |                              |                      |                                                                    |             |
| 35 |                              |                      |                                                                    |             |
| 36 | Recruitment                  | <a href="#">#15</a>  | Strategies for achieving adequate participant enrolment to reach   | 5           |
| 37 |                              |                      | target sample size                                                 |             |
| 38 |                              |                      |                                                                    |             |
| 39 |                              |                      |                                                                    |             |
| 40 | <b>Methods: Assignment</b>   |                      |                                                                    |             |
| 41 | <b>of interventions (for</b> |                      |                                                                    |             |
| 42 | <b>controlled trials)</b>    |                      |                                                                    |             |
| 43 |                              |                      |                                                                    |             |
| 44 |                              |                      |                                                                    |             |
| 45 | Allocation: sequence         | <a href="#">#16a</a> | Method of generating the allocation sequence (eg, computer-        | 5           |
| 46 | generation                   |                      | generated random numbers), and list of any factors for             |             |
| 47 |                              |                      | stratification. To reduce predictability of a random sequence,     |             |
| 48 |                              |                      | details of any planned restriction (eg, blocking) should be        |             |
| 49 |                              |                      | provided in a separate document that is unavailable to those       |             |
| 50 |                              |                      | who enrol participants or assign interventions                     |             |
| 51 |                              |                      |                                                                    |             |
| 52 |                              |                      |                                                                    |             |
| 53 |                              |                      |                                                                    |             |
| 54 |                              |                      |                                                                    |             |
| 55 | Allocation                   | <a href="#">#16b</a> | Mechanism of implementing the allocation sequence (eg,             | 5           |
| 56 | concealment                  |                      | central telephone; sequentially numbered, opaque, sealed           |             |
| 57 | mechanism                    |                      |                                                                    |             |
| 58 |                              |                      |                                                                    |             |
| 59 |                              |                      |                                                                    |             |
| 60 |                              |                      |                                                                    |             |



envelopes), describing any steps to conceal the sequence until interventions are assigned

|    |                        |                      |                                                                   |
|----|------------------------|----------------------|-------------------------------------------------------------------|
| 1  |                        |                      |                                                                   |
| 2  |                        |                      |                                                                   |
| 3  |                        |                      |                                                                   |
| 4  | Allocation:            | <a href="#">#16c</a> | Who will generate the allocation sequence, who will enrol         |
| 5  | implementation         |                      | participants, and who will assign participants to interventions   |
| 6  |                        |                      |                                                                   |
| 7  |                        |                      | NA (in                                                            |
| 8  |                        |                      | main                                                              |
| 9  | Blinding (masking)     | <a href="#">#17a</a> | Who will be blinded after assignment to interventions (eg, trial  |
| 10 |                        |                      | participants, care providers, outcome assessors, data analysts),  |
| 11 |                        |                      | and how                                                           |
| 12 |                        |                      |                                                                   |
| 13 |                        |                      | 5                                                                 |
| 14 | Blinding (masking):    | <a href="#">#17b</a> | If blinded, circumstances under which unblinding is               |
| 15 | emergency unblinding   |                      | permissible, and procedure for revealing a participant's          |
| 16 |                        |                      | allocated intervention during the trial                           |
| 17 |                        |                      |                                                                   |
| 18 |                        |                      | 5                                                                 |
| 19 |                        |                      |                                                                   |
| 20 | <b>Methods: Data</b>   |                      |                                                                   |
| 21 | <b>collection,</b>     |                      |                                                                   |
| 22 | <b>management, and</b> |                      |                                                                   |
| 23 | <b>analysis</b>        |                      |                                                                   |
| 24 |                        |                      |                                                                   |
| 25 |                        |                      |                                                                   |
| 26 | Data collection plan   | <a href="#">#18a</a> | Plans for assessment and collection of outcome, baseline, and     |
| 27 |                        |                      | other trial data, including any related processes to promote data |
| 28 |                        |                      | quality (eg, duplicate measurements, training of assessors) and   |
| 29 |                        |                      | a description of study instruments (eg, questionnaires,           |
| 30 |                        |                      | laboratory tests) along with their reliability and validity, if   |
| 31 |                        |                      | known. Reference to where data collection forms can be found,     |
| 32 |                        |                      | if not in the protocol                                            |
| 33 |                        |                      |                                                                   |
| 34 |                        |                      | 6                                                                 |
| 35 |                        |                      |                                                                   |
| 36 |                        |                      |                                                                   |
| 37 |                        |                      |                                                                   |
| 38 | Data collection plan:  | <a href="#">#18b</a> | Plans to promote participant retention and complete follow-up,    |
| 39 | retention              |                      | including list of any outcome data to be collected for            |
| 40 |                        |                      | participants who discontinue or deviate from intervention         |
| 41 |                        |                      | protocols                                                         |
| 42 |                        |                      |                                                                   |
| 43 |                        |                      | NA (in                                                            |
| 44 |                        |                      | main                                                              |
| 45 | Data management        | <a href="#">#19</a>  | Plans for data entry, coding, security, and storage, including    |
| 46 |                        |                      | any related processes to promote data quality (eg, double data    |
| 47 |                        |                      | entry; range checks for data values). Reference to where details  |
| 48 |                        |                      | of data management procedures can be found, if not in the         |
| 49 |                        |                      | protocol                                                          |
| 50 |                        |                      |                                                                   |
| 51 |                        |                      | NA (in                                                            |
| 52 |                        |                      | main                                                              |
| 53 | Statistics: outcomes   | <a href="#">#20a</a> | Statistical methods for analysing primary and secondary           |
| 54 |                        |                      | outcomes. Reference to where other details of the statistical     |
| 55 |                        |                      | analysis plan can be found, if not in the protocol                |
| 56 |                        |                      |                                                                   |
| 57 |                        |                      | 8-9                                                               |
| 58 |                        |                      |                                                                   |
| 59 |                        |                      |                                                                   |
| 60 |                        |                      |                                                                   |

|    |                            |                      |                                                                    |           |
|----|----------------------------|----------------------|--------------------------------------------------------------------|-----------|
| 1  | Statistics: additional     | <a href="#">#20b</a> | Methods for any additional analyses (eg, subgroup and adjusted     | 8-9       |
| 2  | analyses                   |                      | analyses)                                                          |           |
| 3  |                            |                      |                                                                    |           |
| 4  |                            |                      |                                                                    |           |
| 5  | Statistics: analysis       | <a href="#">#20c</a> | Definition of analysis population relating to protocol non-        | 8-9       |
| 6  | population and             |                      | adherence (eg, as randomised analysis), and any statistical        |           |
| 7  | missing data               |                      | methods to handle missing data (eg, multiple imputation)           |           |
| 8  |                            |                      |                                                                    |           |
| 9  |                            |                      |                                                                    |           |
| 10 | <b>Methods: Monitoring</b> |                      |                                                                    |           |
| 11 |                            |                      |                                                                    |           |
| 12 | Data monitoring:           | <a href="#">#21a</a> | Composition of data monitoring committee (DMC); summary            | 8         |
| 13 | formal committee           |                      | of its role and reporting structure; statement of whether it is    |           |
| 14 |                            |                      | independent from the sponsor and competing interests; and          |           |
| 15 |                            |                      | reference to where further details about its charter can be found, |           |
| 16 |                            |                      | if not in the protocol. Alternatively, an explanation of why a     |           |
| 17 |                            |                      | DMC is not needed                                                  |           |
| 18 |                            |                      |                                                                    |           |
| 19 |                            |                      |                                                                    |           |
| 20 |                            |                      |                                                                    |           |
| 21 |                            |                      |                                                                    |           |
| 22 | Data monitoring:           | <a href="#">#21b</a> | Description of any interim analyses and stopping guidelines,       | 8         |
| 23 | interim analysis           |                      | including who will have access to these interim results and        |           |
| 24 |                            |                      | make the final decision to terminate the trial                     |           |
| 25 |                            |                      |                                                                    |           |
| 26 |                            |                      |                                                                    |           |
| 27 | Harms                      | <a href="#">#22</a>  | Plans for collecting, assessing, reporting, and managing           | 7         |
| 28 |                            |                      | solicited and spontaneously reported adverse events and other      |           |
| 29 |                            |                      | unintended effects of trial interventions or trial conduct         |           |
| 30 |                            |                      |                                                                    |           |
| 31 |                            |                      |                                                                    |           |
| 32 |                            |                      |                                                                    |           |
| 33 | Auditing                   | <a href="#">#23</a>  | Frequency and procedures for auditing trial conduct, if any, and   | NA (in    |
| 34 |                            |                      | whether the process will be independent from investigators and     | main      |
| 35 |                            |                      | the sponsor                                                        | protocol) |
| 36 |                            |                      |                                                                    |           |
| 37 |                            |                      |                                                                    |           |
| 38 | <b>Ethics and</b>          |                      |                                                                    |           |
| 39 | <b>dissemination</b>       |                      |                                                                    |           |
| 40 |                            |                      |                                                                    |           |
| 41 |                            |                      |                                                                    |           |
| 42 | Research ethics            | <a href="#">#24</a>  | Plans for seeking research ethics committee / institutional        | 9         |
| 43 | approval                   |                      | review board (REC / IRB) approval                                  |           |
| 44 |                            |                      |                                                                    |           |
| 45 |                            |                      |                                                                    |           |
| 46 | Protocol amendments        | <a href="#">#25</a>  | Plans for communicating important protocol modifications (eg,      | 9         |
| 47 |                            |                      | changes to eligibility criteria, outcomes, analyses) to relevant   |           |
| 48 |                            |                      | parties (eg, investigators, REC / IRBs, trial participants, trial  |           |
| 49 |                            |                      | registries, journals, regulators)                                  |           |
| 50 |                            |                      |                                                                    |           |
| 51 |                            |                      |                                                                    |           |
| 52 |                            |                      |                                                                    |           |
| 53 | Consent or assent          | <a href="#">#26a</a> | Who will obtain informed consent or assent from potential trial    | NA (in    |
| 54 |                            |                      | participants or authorised surrogates, and how (see Item 32)       | main      |
| 55 |                            |                      |                                                                    | protocol) |
| 56 |                            |                      |                                                                    |           |
| 57 |                            |                      |                                                                    |           |
| 58 |                            |                      |                                                                    |           |
| 59 |                            |                      |                                                                    |           |
| 60 |                            |                      |                                                                    |           |

|    |                          |                      |                                                                      |           |
|----|--------------------------|----------------------|----------------------------------------------------------------------|-----------|
| 1  | Consent or assent:       | <a href="#">#26b</a> | Additional consent provisions for collection and use of              | NA (in    |
| 2  | ancillary studies        |                      | participant data and biological specimens in ancillary studies, if   | main      |
| 3  |                          |                      | applicable                                                           | protocol) |
| 4  |                          |                      |                                                                      |           |
| 5  |                          |                      |                                                                      |           |
| 6  | Confidentiality          | <a href="#">#27</a>  | How personal information about potential and enrolled                | NA (in    |
| 7  |                          |                      | participants will be collected, shared, and maintained in order      | main      |
| 8  |                          |                      | to protect confidentiality before, during, and after the trial       | protocol) |
| 9  |                          |                      |                                                                      |           |
| 10 |                          |                      |                                                                      |           |
| 11 | Declaration of           | <a href="#">#28</a>  | Financial and other competing interests for principal                | 16        |
| 12 | interests                |                      | investigators for the overall trial and each study site              |           |
| 13 |                          |                      |                                                                      |           |
| 14 |                          |                      |                                                                      |           |
| 15 | Data access              | <a href="#">#29</a>  | Statement of who will have access to the final trial dataset, and    | NA (in    |
| 16 |                          |                      | disclosure of contractual agreements that limit such access for      | main      |
| 17 |                          |                      | investigators                                                        | protocol) |
| 18 |                          |                      |                                                                      |           |
| 19 |                          |                      |                                                                      |           |
| 20 | Ancillary and post trial | <a href="#">#30</a>  | Provisions, if any, for ancillary and post-trial care, and for       | NA (in    |
| 21 | care                     |                      | compensation to those who suffer harm from trial participation       | main      |
| 22 |                          |                      |                                                                      | protocol) |
| 23 |                          |                      |                                                                      |           |
| 24 |                          |                      |                                                                      |           |
| 25 |                          |                      |                                                                      |           |
| 26 | Dissemination policy:    | <a href="#">#31a</a> | Plans for investigators and sponsor to communicate trial results     | 9         |
| 27 | trial results            |                      | to participants, healthcare professionals, the public, and other     |           |
| 28 |                          |                      | relevant groups (eg, via publication, reporting in results           |           |
| 29 |                          |                      | databases, or other data sharing arrangements), including any        |           |
| 30 |                          |                      | publication restrictions                                             |           |
| 31 |                          |                      |                                                                      |           |
| 32 |                          |                      |                                                                      |           |
| 33 |                          |                      |                                                                      |           |
| 34 | Dissemination policy:    | <a href="#">#31b</a> | Authorship eligibility guidelines and any intended use of            | NA (in    |
| 35 | authorship               |                      | professional writers                                                 | main      |
| 36 |                          |                      |                                                                      | protocol) |
| 37 |                          |                      |                                                                      |           |
| 38 |                          |                      |                                                                      |           |
| 39 | Dissemination policy:    | <a href="#">#31c</a> | Plans, if any, for granting public access to the full protocol,      | NA (in    |
| 40 | reproducible research    |                      | participant-level dataset, and statistical code                      | main      |
| 41 |                          |                      |                                                                      | protocol) |
| 42 |                          |                      |                                                                      |           |
| 43 |                          |                      |                                                                      |           |
| 44 |                          |                      |                                                                      |           |
| 45 | <b>Appendices</b>        |                      |                                                                      |           |
| 46 |                          |                      |                                                                      |           |
| 47 | Informed consent         | <a href="#">#32</a>  | Model consent form and other related documentation given to          | NA (in    |
| 48 | materials                |                      | participants and authorised surrogates                               | main      |
| 49 |                          |                      |                                                                      | protocol) |
| 50 |                          |                      |                                                                      |           |
| 51 |                          |                      |                                                                      |           |
| 52 | Biological specimens     | <a href="#">#33</a>  | Plans for collection, laboratory evaluation, and storage of          | NA (in    |
| 53 |                          |                      | biological specimens for genetic or molecular analysis in the        | main      |
| 54 |                          |                      | current trial and for future use in ancillary studies, if applicable | protocol) |
| 55 |                          |                      |                                                                      |           |
| 56 |                          |                      |                                                                      |           |
| 57 |                          |                      |                                                                      |           |

Notes:

- 1 • 2b: NA (in main protocol)
- 2
- 3 • 3: NA (in main protocol)
- 4
- 5 • 5b: NA (in main protocol)
- 6
- 7 • 5d: NA (in main protocol)
- 8
- 9 • 11b: NA (in main protocol)
- 10
- 11 • 11c: NA (in main protocol)
- 12
- 13
- 14 • 13: 6, Figure 1
- 15
- 16 • 16c: NA (in main protocol)
- 17
- 18 • 18b: NA (in main protocol)
- 19
- 20
- 21 • 19: NA (in main protocol)
- 22
- 23 • 23: NA (in main protocol)
- 24
- 25 • 26a: NA (in main protocol)
- 26
- 27 • 26b: NA (in main protocol)
- 28
- 29 • 27: NA (in main protocol)
- 30
- 31 • 29: NA (in main protocol)
- 32
- 33 • 30: NA (in main protocol)
- 34
- 35 • 31b: NA (in main protocol)
- 36
- 37 • 31c: NA (in main protocol)
- 38
- 39 • 32: NA (in main protocol)
- 40
- 41
- 42 • 33: NA (in main protocol) The SPIRIT Explanation and Elaboration paper is distributed under the terms of
- 43
- 44 the Creative Commons Attribution License CC-BY-NC. This checklist was completed on 08. June 2021
- 45
- 46 using <https://www.goodreports.org/>, a tool made by the [EQUATOR Network](#) in collaboration with
- 47
- 48 [Penelope.ai](#)
- 49
- 50
- 51
- 52
- 53
- 54
- 55
- 56
- 57
- 58
- 59
- 60

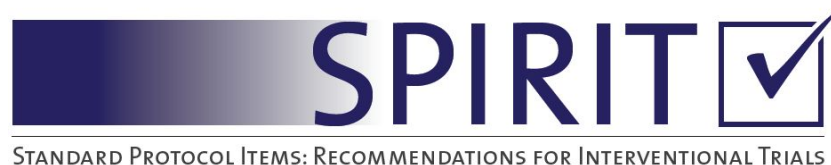

STANDARD PROTOCOL ITEMS: RECOMMENDATIONS FOR INTERVENTIONAL TRIALS

SPIRIT 2013 Checklist: Recommended items to address in a clinical trial protocol and related documents\*

| Section/item                      | Item No | Description                                                                                                                                                                                                                                                                              | Addressed on page number |
|-----------------------------------|---------|------------------------------------------------------------------------------------------------------------------------------------------------------------------------------------------------------------------------------------------------------------------------------------------|--------------------------|
| <b>Administrative information</b> |         |                                                                                                                                                                                                                                                                                          |                          |
| Title                             | 1       | Descriptive title identifying the study design, population, interventions, and, if applicable, trial acronym                                                                                                                                                                             | 1                        |
| Trial registration                | 2a      | Trial identifier and registry name. If not yet registered, name of intended registry                                                                                                                                                                                                     | 1                        |
|                                   | 2b      | All items from the World Health Organization Trial Registration Data Set                                                                                                                                                                                                                 | 9                        |
| Protocol version                  | 3       | Date and version identifier                                                                                                                                                                                                                                                              | 5 (footer for all)       |
| Funding                           | 4       | Sources and types of financial, material, and other support                                                                                                                                                                                                                              | 1                        |
| Roles and responsibilities        | 5a      | Names, affiliations, and roles of protocol contributors                                                                                                                                                                                                                                  | 55                       |
|                                   | 5b      | Name and contact information for the trial sponsor                                                                                                                                                                                                                                       | 1                        |
|                                   | 5c      | Role of study sponsor and funders, if any, in study design; collection, management, analysis, and interpretation of data; writing of the report; and the decision to submit the report for publication, including whether they will have ultimate authority over any of these activities | 56                       |
|                                   | 5d      | Composition, roles, and responsibilities of the coordinating centre, steering committee, endpoint adjudication committee, data management team, and other individuals or groups overseeing the trial, if applicable (see Item 21a for data monitoring committee)                         | 56-7                     |

1 **Introduction**

2

3 Background and 6a Description of research question and justification for undertaking the trial, including summary of relevant 11-18  
4 rationale studies (published and unpublished) examining benefits and harms for each intervention  
5

6 6b Explanation for choice of comparators 14  
7

8 Objectives 7 Specific objectives or hypotheses 19  
9

10 Trial design 8 Description of trial design including type of trial (eg, parallel group, crossover, factorial, single group),  
11 allocation ratio, and framework (eg, superiority, equivalence, noninferiority, exploratory) 19  
12  
13

14 **Methods: Participants, interventions, and outcomes**

15

16 Study setting 9 Description of study settings (eg, community clinic, academic hospital) and list of countries where data will 20  
17 be collected. Reference to where list of study sites can be obtained  
18

19 Eligibility criteria 10 Inclusion and exclusion criteria for participants. If applicable, eligibility criteria for study centres and 21  
20 individuals who will perform the interventions (eg, surgeons, psychotherapists)  
21

22 Interventions 11a Interventions for each group with sufficient detail to allow replication, including how and when they will be 22  
23 administered  
24

25 11b Criteria for discontinuing or modifying allocated interventions for a given trial participant (eg, drug dose 23  
26 change in response to harms, participant request, or improving/worsening disease)  
27

28 11c Strategies to improve adherence to intervention protocols, and any procedures for monitoring adherence 24  
29 (eg, drug tablet return, laboratory tests)  
30

31 11d Relevant concomitant care and interventions that are permitted or prohibited during the trial 24  
32  
33

34 Outcomes 12 Primary, secondary, and other outcomes, including the specific measurement variable (eg, systolic blood  
35 pressure), analysis metric (eg, change from baseline, final value, time to event), method of aggregation (eg, 25  
36 median, proportion), and time point for each outcome. Explanation of the clinical relevance of chosen  
37 efficacy and harm outcomes is strongly recommended  
38  
39

40 Participant timeline 13 Time schedule of enrolment, interventions (including any run-ins and washouts), assessments, and visits for 26  
41 participants. A schematic diagram is highly recommended (see Figure)  
42  
43

|   |             |    |                                                                                                                                                                                       |    |
|---|-------------|----|---------------------------------------------------------------------------------------------------------------------------------------------------------------------------------------|----|
| 1 | Sample size | 14 | Estimated number of participants needed to achieve study objectives and how it was determined, including clinical and statistical assumptions supporting any sample size calculations | 31 |
| 2 |             |    |                                                                                                                                                                                       |    |
| 3 |             |    |                                                                                                                                                                                       |    |
| 4 | Recruitment | 15 | Strategies for achieving adequate participant enrolment to reach target sample size                                                                                                   | 31 |
| 5 |             |    |                                                                                                                                                                                       |    |

## 6 **Methods: Assignment of interventions (for controlled trials)**

### 7 Allocation:

|    |                                  |     |                                                                                                                                                                                                                                                                                                                                                          |    |
|----|----------------------------------|-----|----------------------------------------------------------------------------------------------------------------------------------------------------------------------------------------------------------------------------------------------------------------------------------------------------------------------------------------------------------|----|
| 10 | Sequence generation              | 16a | Method of generating the allocation sequence (eg, computer-generated random numbers), and list of any factors for stratification. To reduce predictability of a random sequence, details of any planned restriction (eg, blocking) should be provided in a separate document that is unavailable to those who enrol participants or assign interventions | 32 |
| 11 |                                  |     |                                                                                                                                                                                                                                                                                                                                                          |    |
| 12 |                                  |     |                                                                                                                                                                                                                                                                                                                                                          |    |
| 13 |                                  |     |                                                                                                                                                                                                                                                                                                                                                          |    |
| 14 |                                  |     |                                                                                                                                                                                                                                                                                                                                                          |    |
| 15 |                                  |     |                                                                                                                                                                                                                                                                                                                                                          |    |
| 16 | Allocation concealment mechanism | 16b | Mechanism of implementing the allocation sequence (eg, central telephone; sequentially numbered, opaque, sealed envelopes), describing any steps to conceal the sequence until interventions are assigned                                                                                                                                                | 33 |
| 17 |                                  |     |                                                                                                                                                                                                                                                                                                                                                          |    |
| 18 |                                  |     |                                                                                                                                                                                                                                                                                                                                                          |    |
| 19 |                                  |     |                                                                                                                                                                                                                                                                                                                                                          |    |
| 20 | Implementation                   | 16c | Who will generate the allocation sequence, who will enrol participants, and who will assign participants to interventions                                                                                                                                                                                                                                | 33 |
| 21 |                                  |     |                                                                                                                                                                                                                                                                                                                                                          |    |
| 22 |                                  |     |                                                                                                                                                                                                                                                                                                                                                          |    |
| 23 |                                  |     |                                                                                                                                                                                                                                                                                                                                                          |    |
| 24 | Blinding (masking)               | 17a | Who will be blinded after assignment to interventions (eg, trial participants, care providers, outcome assessors, data analysts), and how                                                                                                                                                                                                                | 33 |
| 25 |                                  |     |                                                                                                                                                                                                                                                                                                                                                          |    |
| 26 |                                  |     |                                                                                                                                                                                                                                                                                                                                                          |    |
| 27 |                                  | 17b | If blinded, circumstances under which unblinding is permissible, and procedure for revealing a participant's allocated intervention during the trial                                                                                                                                                                                                     | 34 |
| 28 |                                  |     |                                                                                                                                                                                                                                                                                                                                                          |    |
| 29 |                                  |     |                                                                                                                                                                                                                                                                                                                                                          |    |
| 30 |                                  |     |                                                                                                                                                                                                                                                                                                                                                          |    |

## 31 **Methods: Data collection, management, and analysis**

|    |                         |     |                                                                                                                                                                                                                                                                                                                                                                                                              |    |
|----|-------------------------|-----|--------------------------------------------------------------------------------------------------------------------------------------------------------------------------------------------------------------------------------------------------------------------------------------------------------------------------------------------------------------------------------------------------------------|----|
| 33 | Data collection methods | 18a | Plans for assessment and collection of outcome, baseline, and other trial data, including any related processes to promote data quality (eg, duplicate measurements, training of assessors) and a description of study instruments (eg, questionnaires, laboratory tests) along with their reliability and validity, if known. Reference to where data collection forms can be found, if not in the protocol | 34 |
| 34 |                         |     |                                                                                                                                                                                                                                                                                                                                                                                                              |    |
| 35 |                         |     |                                                                                                                                                                                                                                                                                                                                                                                                              |    |
| 36 |                         |     |                                                                                                                                                                                                                                                                                                                                                                                                              |    |
| 37 |                         |     |                                                                                                                                                                                                                                                                                                                                                                                                              |    |
| 38 |                         |     |                                                                                                                                                                                                                                                                                                                                                                                                              |    |
| 39 |                         | 18b | Plans to promote participant retention and complete follow-up, including list of any outcome data to be collected for participants who discontinue or deviate from intervention protocols                                                                                                                                                                                                                    | 37 |
| 40 |                         |     |                                                                                                                                                                                                                                                                                                                                                                                                              |    |
| 41 |                         |     |                                                                                                                                                                                                                                                                                                                                                                                                              |    |
| 42 |                         |     |                                                                                                                                                                                                                                                                                                                                                                                                              |    |

|    |                                 |     |                                                                                                                                                                                                                                                                                                                                       |    |
|----|---------------------------------|-----|---------------------------------------------------------------------------------------------------------------------------------------------------------------------------------------------------------------------------------------------------------------------------------------------------------------------------------------|----|
| 1  | Data management                 | 19  | Plans for data entry, coding, security, and storage, including any related processes to promote data quality (eg, double data entry; range checks for data values). Reference to where details of data management procedures can be found, if not in the protocol                                                                     | 38 |
| 2  |                                 |     |                                                                                                                                                                                                                                                                                                                                       |    |
| 3  |                                 |     |                                                                                                                                                                                                                                                                                                                                       |    |
| 4  |                                 |     |                                                                                                                                                                                                                                                                                                                                       |    |
| 5  | Statistical methods             | 20a | Statistical methods for analysing primary and secondary outcomes. Reference to where other details of the statistical analysis plan can be found, if not in the protocol                                                                                                                                                              | 40 |
| 6  |                                 |     |                                                                                                                                                                                                                                                                                                                                       |    |
| 7  |                                 |     |                                                                                                                                                                                                                                                                                                                                       |    |
| 8  |                                 | 20b | Methods for any additional analyses (eg, subgroup and adjusted analyses)                                                                                                                                                                                                                                                              | 41 |
| 9  |                                 |     |                                                                                                                                                                                                                                                                                                                                       |    |
| 10 |                                 | 20c | Definition of analysis population relating to protocol non-adherence (eg, as randomised analysis), and any statistical methods to handle missing data (eg, multiple imputation)                                                                                                                                                       | 40 |
| 11 |                                 |     |                                                                                                                                                                                                                                                                                                                                       |    |
| 12 |                                 |     |                                                                                                                                                                                                                                                                                                                                       |    |
| 13 |                                 |     |                                                                                                                                                                                                                                                                                                                                       |    |
| 14 | <b>Methods: Monitoring</b>      |     |                                                                                                                                                                                                                                                                                                                                       |    |
| 15 |                                 |     |                                                                                                                                                                                                                                                                                                                                       |    |
| 16 | Data monitoring                 | 21a | Composition of data monitoring committee (DMC); summary of its role and reporting structure; statement of whether it is independent from the sponsor and competing interests; and reference to where further details about its charter can be found, if not in the protocol. Alternatively, an explanation of why a DMC is not needed | 43 |
| 17 |                                 |     |                                                                                                                                                                                                                                                                                                                                       |    |
| 18 |                                 |     |                                                                                                                                                                                                                                                                                                                                       |    |
| 19 |                                 |     |                                                                                                                                                                                                                                                                                                                                       |    |
| 20 |                                 |     |                                                                                                                                                                                                                                                                                                                                       |    |
| 21 |                                 |     |                                                                                                                                                                                                                                                                                                                                       |    |
| 22 |                                 | 21b | Description of any interim analyses and stopping guidelines, including who will have access to these interim results and make the final decision to terminate the trial                                                                                                                                                               | 43 |
| 23 |                                 |     |                                                                                                                                                                                                                                                                                                                                       |    |
| 24 |                                 |     |                                                                                                                                                                                                                                                                                                                                       |    |
| 25 | Harms                           | 22  | Plans for collecting, assessing, reporting, and managing solicited and spontaneously reported adverse events and other unintended effects of trial interventions or trial conduct                                                                                                                                                     | 44 |
| 26 |                                 |     |                                                                                                                                                                                                                                                                                                                                       |    |
| 27 |                                 |     |                                                                                                                                                                                                                                                                                                                                       |    |
| 28 | Auditing                        | 23  | Frequency and procedures for auditing trial conduct, if any, and whether the process will be independent from investigators and the sponsor                                                                                                                                                                                           | 47 |
| 29 |                                 |     |                                                                                                                                                                                                                                                                                                                                       |    |
| 30 |                                 |     |                                                                                                                                                                                                                                                                                                                                       |    |
| 31 |                                 |     |                                                                                                                                                                                                                                                                                                                                       |    |
| 32 | <b>Ethics and dissemination</b> |     |                                                                                                                                                                                                                                                                                                                                       |    |
| 33 |                                 |     |                                                                                                                                                                                                                                                                                                                                       |    |
| 34 | Research ethics approval        | 24  | Plans for seeking research ethics committee/institutional review board (REC/IRB) approval                                                                                                                                                                                                                                             | 48 |
| 35 |                                 |     |                                                                                                                                                                                                                                                                                                                                       |    |
| 36 |                                 |     |                                                                                                                                                                                                                                                                                                                                       |    |
| 37 | Protocol amendments             | 25  | Plans for communicating important protocol modifications (eg, changes to eligibility criteria, outcomes, analyses) to relevant parties (eg, investigators, REC/IRBs, trial participants, trial registries, journals, regulators)                                                                                                      | 48 |
| 38 |                                 |     |                                                                                                                                                                                                                                                                                                                                       |    |
| 39 |                                 |     |                                                                                                                                                                                                                                                                                                                                       |    |
| 40 |                                 |     |                                                                                                                                                                                                                                                                                                                                       |    |
| 41 |                                 |     |                                                                                                                                                                                                                                                                                                                                       |    |
| 42 |                                 |     |                                                                                                                                                                                                                                                                                                                                       |    |



|    |                               |     |                                                                                                                                                                                                                                                                                     |    |
|----|-------------------------------|-----|-------------------------------------------------------------------------------------------------------------------------------------------------------------------------------------------------------------------------------------------------------------------------------------|----|
| 1  | Consent or assent             | 26a | Who will obtain informed consent or assent from potential trial participants or authorised surrogates, and how (see Item 32)                                                                                                                                                        | 49 |
| 2  |                               |     |                                                                                                                                                                                                                                                                                     |    |
| 3  |                               |     |                                                                                                                                                                                                                                                                                     |    |
| 4  |                               | 26b | Additional consent provisions for collection and use of participant data and biological specimens in ancillary studies, if applicable                                                                                                                                               | 50 |
| 5  |                               |     |                                                                                                                                                                                                                                                                                     |    |
| 6  |                               |     |                                                                                                                                                                                                                                                                                     |    |
| 7  | Confidentiality               | 27  | How personal information about potential and enrolled participants will be collected, shared, and maintained in order to protect confidentiality before, during, and after the trial                                                                                                | 51 |
| 8  |                               |     |                                                                                                                                                                                                                                                                                     |    |
| 9  |                               |     |                                                                                                                                                                                                                                                                                     |    |
| 10 | Declaration of interests      | 28  | Financial and other competing interests for principal investigators for the overall trial and each study site                                                                                                                                                                       | 51 |
| 11 |                               |     |                                                                                                                                                                                                                                                                                     |    |
| 12 |                               |     |                                                                                                                                                                                                                                                                                     |    |
| 13 | Access to data                | 29  | Statement of who will have access to the final trial dataset, and disclosure of contractual agreements that limit such access for investigators                                                                                                                                     | 52 |
| 14 |                               |     |                                                                                                                                                                                                                                                                                     |    |
| 15 |                               |     |                                                                                                                                                                                                                                                                                     |    |
| 16 | Ancillary and post-trial care | 30  | Provisions, if any, for ancillary and post-trial care, and for compensation to those who suffer harm from trial participation                                                                                                                                                       | 52 |
| 17 |                               |     |                                                                                                                                                                                                                                                                                     |    |
| 18 |                               |     |                                                                                                                                                                                                                                                                                     |    |
| 19 |                               |     |                                                                                                                                                                                                                                                                                     |    |
| 20 | Dissemination policy          | 31a | Plans for investigators and sponsor to communicate trial results to participants, healthcare professionals, the public, and other relevant groups (eg, via publication, reporting in results databases, or other data sharing arrangements), including any publication restrictions | 53 |
| 21 |                               |     |                                                                                                                                                                                                                                                                                     |    |
| 22 |                               |     |                                                                                                                                                                                                                                                                                     |    |
| 23 |                               |     |                                                                                                                                                                                                                                                                                     |    |
| 24 |                               | 31b | Authorship eligibility guidelines and any intended use of professional writers                                                                                                                                                                                                      | 53 |
| 25 |                               |     |                                                                                                                                                                                                                                                                                     |    |
| 26 |                               | 31c | Plans, if any, for granting public access to the full protocol, participant-level dataset, and statistical code                                                                                                                                                                     | 53 |
| 27 |                               |     |                                                                                                                                                                                                                                                                                     |    |
| 28 |                               |     |                                                                                                                                                                                                                                                                                     |    |
| 29 | <b>Appendices</b>             |     |                                                                                                                                                                                                                                                                                     |    |
| 30 |                               |     |                                                                                                                                                                                                                                                                                     |    |
| 31 | Informed consent materials    | 32  | Model consent form and other related documentation given to participants and authorised surrogates                                                                                                                                                                                  | 57 |
| 32 |                               |     |                                                                                                                                                                                                                                                                                     |    |
| 33 |                               |     |                                                                                                                                                                                                                                                                                     |    |
| 34 | Biological specimens          | 33  | Plans for collection, laboratory evaluation, and storage of biological specimens for genetic or molecular analysis in the current trial and for future use in ancillary studies, if applicable                                                                                      | 58 |
| 35 |                               |     |                                                                                                                                                                                                                                                                                     |    |
| 36 |                               |     |                                                                                                                                                                                                                                                                                     |    |

37 \*It is strongly recommended that this checklist be read in conjunction with the SPIRIT 2013 Explanation & Elaboration for important clarification on the items.  
 38 Amendments to the protocol should be tracked and dated. The SPIRIT checklist is copyrighted by the SPIRIT Group under the Creative Commons  
 39 “[Attribution-NonCommercial-NoDerivs 3.0 Unported](https://creativecommons.org/licenses/by-nc-nd/3.0/)” license.  
 40  
 41  
 42

# BMJ Open

## Celecoxib versus placebo as an adjunct to treatment-as-usual in children and youth with obsessive-compulsive disorder: Protocol for a single-site randomized quadruple-blind phase II study

|                                 |                                                                                                                                                                                                                                                                                                                                                                                                                                                                                                                                                                                                                                                                                                                                                                                                                                                                                                                                                                                                                                                                                     |
|---------------------------------|-------------------------------------------------------------------------------------------------------------------------------------------------------------------------------------------------------------------------------------------------------------------------------------------------------------------------------------------------------------------------------------------------------------------------------------------------------------------------------------------------------------------------------------------------------------------------------------------------------------------------------------------------------------------------------------------------------------------------------------------------------------------------------------------------------------------------------------------------------------------------------------------------------------------------------------------------------------------------------------------------------------------------------------------------------------------------------------|
| Journal:                        | <i>BMJ Open</i>                                                                                                                                                                                                                                                                                                                                                                                                                                                                                                                                                                                                                                                                                                                                                                                                                                                                                                                                                                                                                                                                     |
| Manuscript ID                   | bmjopen-2021-054296.R1                                                                                                                                                                                                                                                                                                                                                                                                                                                                                                                                                                                                                                                                                                                                                                                                                                                                                                                                                                                                                                                              |
| Article Type:                   | Protocol                                                                                                                                                                                                                                                                                                                                                                                                                                                                                                                                                                                                                                                                                                                                                                                                                                                                                                                                                                                                                                                                            |
| Date Submitted by the Author:   | 29-Dec-2021                                                                                                                                                                                                                                                                                                                                                                                                                                                                                                                                                                                                                                                                                                                                                                                                                                                                                                                                                                                                                                                                         |
| Complete List of Authors:       | Westwell-Roper, Clara; The University of British Columbia Faculty of Medicine, Psychiatry; BC Children's Hospital Research Institute, Best, John; BC Children's Hospital Research Institute Elbe, Dean; BC Children's Hospital; The University of British Columbia Faculty of Medicine<br>MacFadden, Megan; BC Children's Hospital, Department of Psychiatry; The University of British Columbia Faculty of Medicine, Psychiatry<br>Baer, Susan; BC Children's Hospital, Department of Psychiatry; The University of British Columbia Faculty of Medicine, Psychiatry<br>Tucker, Lori; BC Children's Hospital Research Institute; The University of British Columbia Faculty of Medicine, Pediatrics<br>Au, Antony; BC Children's Hospital Research Institute<br>Naqqash, Zainab; BC Children's Hospital Research Institute<br>Lin, Boyee; BC Children's Hospital Research Institute<br>Lu, Cynthia; BC Children's Hospital Research Institute<br>Stewart, S. Evelyn; BC Children's Hospital Research Institute; The University of British Columbia Faculty of Medicine, Psychiatry |
| <b>Primary Subject Heading</b>: | Mental health                                                                                                                                                                                                                                                                                                                                                                                                                                                                                                                                                                                                                                                                                                                                                                                                                                                                                                                                                                                                                                                                       |
| Secondary Subject Heading:      | Paediatrics, Pharmacology and therapeutics                                                                                                                                                                                                                                                                                                                                                                                                                                                                                                                                                                                                                                                                                                                                                                                                                                                                                                                                                                                                                                          |
| Keywords:                       | Child & adolescent psychiatry < PSYCHIATRY, Immunology < NATURAL SCIENCE DISCIPLINES, MENTAL HEALTH                                                                                                                                                                                                                                                                                                                                                                                                                                                                                                                                                                                                                                                                                                                                                                                                                                                                                                                                                                                 |
|                                 |                                                                                                                                                                                                                                                                                                                                                                                                                                                                                                                                                                                                                                                                                                                                                                                                                                                                                                                                                                                                                                                                                     |

SCHOLARONE™  
Manuscripts

1  
2  
3  
4 **Celecoxib versus placebo as an adjunct to treatment-as-usual in**  
5 **children and youth with obsessive-compulsive disorder:**  
6 **Protocol for a single-site randomized quadruple-blind phase II study**  
7  
8

9 Westwell-Roper C<sup>1,2\*</sup>, Best J<sup>2</sup>, Elbe D<sup>3,4</sup>, MacFadden M<sup>1,3</sup>, Baer S<sup>1,3</sup>, Tucker LB<sup>3,5</sup>, Au A<sup>2</sup>, Naqqash Z<sup>2</sup>,  
10 Lin B<sup>2</sup>, Lu C<sup>2</sup>, Stewart SE<sup>1,2,3,6</sup>  
11

12  
13 <sup>1</sup>Department of Psychiatry, Faculty of Medicine, University of British Columbia, Vancouver, BC,  
14 Canada; <sup>2</sup>Provincial OCD Program, BC Children's Hospital Research Institute, Vancouver, BC, Canada;  
15 <sup>3</sup>BC Children's Hospital, Vancouver, BC, Canada; <sup>4</sup>Faculty of Pharmaceutical Sciences, University of  
16 British Columbia, Vancouver, BC, Canada; <sup>5</sup>Division of Rheumatology, Department of Pediatrics,  
17 Faculty of Medicine, University of British Columbia, Vancouver, BC, Canada; <sup>6</sup>Sponsor-Investigator  
18

19  
20 \*Corresponding author: Clara Westwell-Roper, MD, PhD. Group of Dr. S. Evelyn Stewart, BC  
21 Children's Hospital Research Institute. 950 West 28th Avenue, Vancouver, BC V5Z 4H4.  
22 cwestwellroper@bcchr.ubc.ca.  
23  
24  
25  
26

27 **Keywords:** Obsessive-compulsive disorder; anti-inflammatory agents, non-steroidal; cyclooxygenase  
28 inhibitors; randomized controlled trial; child; adolescent; Pediatrics; child health  
29

30 **Abbreviations:** AE, adverse event; ALT, alanine aminotransferase; AST, aspartate aminotransferase;  
31 ASD, autism spectrum disorder; BMI, body mass index, BCCH, British Columbia Children's Hospital;  
32 CGI, clinical global impression; CNS, central nervous system; C&W, Children's and Women's Health  
33 Centre; CBC, complete blood count; Cr, creatinine, COX, cyclooxygenase; CY-BOCS, Children's Yale-  
34 Brown Obsessive Compulsive Scale (Version I); CY-BOCS II, Children's Yale-Brown Obsessive  
35 Compulsive Scale (Version II); DSMB, data safety monitoring board; eCRF, electronic case report form;  
36 MDD, major depressive disorder; MINI-Kid, Mini International Neuropsychiatric Interview for Children  
37 and Adolescents; NSAID, Non-steroidal anti-inflammatory drug; OCD, obsessive-compulsive disorder;  
38 OCI-CV, Obsessive Compulsive Inventory – Child Version; PANS, pediatric acute neuropsychiatric  
39 syndrome; PANDAS, pediatric autoimmune disorder associated with streptococcal infections; PGI,  
40 patient global impression; PPQ, Participant Perspective Questionnaire; RCT, randomized controlled trial;  
41 RA, Research Assistant; REDCap, Research Electronic Data Capture; REB, Research Ethics Board;  
42 SMURF, Safety Monitoring Uniform Research Form; SRI, serotonin reuptake inhibitor; SSRI, selective  
43 serotonin reuptake inhibitor  
44  
45  
46  
47  
48  
49  
50  
51  
52  
53  
54  
55  
56  
57  
58  
59  
60

## ABSTRACT

**Background:** Cyclooxygenase (COX) enzymes oxidize arachidonic acid to prostaglandins, which modulate neuronal function and inflammation in the central nervous system. Consensus guidelines suggest NSAIDs as a possible adjunctive approach in adults with obsessive-compulsive disorder (OCD) and in children with acute-onset OCD subtypes. However, there is limited evidence to support this approach. The primary objective of this study is to determine the efficacy of the COX-2-selective inhibitor celecoxib as an adjunct to treatment-as-usual in children and youth with moderate-to-severe OCD. The safety of this intervention including adverse events will also be systematically assessed.

**Methods:** The Adjunctive CElecoxib in childhood-onset OCD (ACE-OCD) study is a single-centre randomized, quadruple-blind, placebo-controlled superiority trial with two parallel groups: celecoxib 100 mg twice daily and placebo. Treatments will be added to participants' routine clinical care, which will not change over the course of the study. Target recruitment is 80 participants ages 7-18 with no recent treatment changes. The primary outcome is OCD severity after 12 weeks of treatment, measured by clinician-administered Children's Yale-Brown Obsessive Compulsive Scale (CY-BOCS). Secondary outcomes include CY-BOCS score after 6 weeks; difference in the proportion of participants achieving a clinically meaningful response or remission; mean clinical global impression of severity and improvement after 6 and 12 weeks; and proportion of participants reporting adverse events possibly or probably related to the study intervention. The primary analyses, carried out according to intention-to-treat principles, will compare the celecoxib to placebo group on each outcome of interest, adjusting for baseline scores using analysis of covariance or logistic regression. Participants will be offered a 12-week open-label celecoxib extension and will be invited to participate in an ancillary study for biomarker analyses.

**Ethics and dissemination:** This protocol has been approved by the University of British Columbia Children's and Women's Research Ethics Board and has received a No Objection Letter from Health Canada. The findings will be disseminated in peer-reviewed journals and presentations to multiple stakeholders including patients, parents, and health care providers.

**Trial registration number:** NCT04673578. Open for recruitment.

## STRENGTHS AND LIMITATIONS OF THIS STUDY

- This study is the first randomized, placebo-controlled trial to evaluate the efficacy and safety of adjunctive NSAID therapy in childhood-onset OCD and does not restrict participants to a diagnosis of pediatric acute-onset neuropsychiatric syndrome (PANS) or pediatric autoimmune neuropsychiatric disorder associated with streptococcal infections (PANDAS).
- Study visits may occur virtually and screening blood work can be completed in participants' local communities, increasing accessibility for participants.
- Participants will have the option to consent to an ancillary study involving biosample collection for correlative biology; this will provide preliminary longitudinal data allowing measurement of associations between inflammatory biomarkers and clinical phenotype.
- This study incorporates assessment of participants' and parents' perspectives on participation, including their experience of virtual visits, to inform future studies of psychopharmacologic interventions in this population.
- While heterogeneity of usual therapy may limit power to detect differences between arms, this represents a more pragmatic approach than contemporaneous initiation of a selective serotonin reuptake inhibitor as described in preliminary studies in adults.

## INTRODUCTION

Obsessive-compulsive disorder (OCD) is a common neuropsychiatric condition identified by the World Health Organization as one of the leading causes of worldwide medical disability<sup>1</sup>. It affects 1-3% of the population and places significant burden on patients, families, and healthcare systems<sup>2</sup>. Childhood-onset OCD (CO-OCD) represents a specific subtype with unique epidemiological, etiological, and clinical characteristics<sup>3,4</sup>. Although cognitive behavioural therapy (CBT) and serotonin reuptake inhibitors (SRIs) are effective treatments, there is a critical need to develop novel and augmenting agents for patients with enduring symptoms.

A large body of work suggests an association between infection and an abrupt, early-onset form of OCD, termed pediatric autoimmune disorder associated with streptococcal infections (PANDAS)<sup>5</sup>, as well as pediatric acute neuropsychiatric syndrome (PANS)<sup>6</sup>. Recent epidemiological data suggest that recurrent episodes of infection and inflammation are associated with the development of multiple mental disorders in children<sup>7</sup>, including “classic” OCD<sup>8</sup>. Moreover, patients with autoimmune disorders have higher rates of comorbid OCD compared to the general population<sup>9,10</sup>. A recent cohort study based on Swedish National Register data suggested increased rates of multiple autoimmune diseases among patients with OCD and their first-degree relatives<sup>11</sup>; we have also described higher-than-expected rates of immune-related conditions in individuals with CO-OCD<sup>12</sup>. Positron emission tomography imaging study in adults with OCD has demonstrated increased volume of translocator protein-18 distribution in cortico-striato-thalamo-cortical circuits, implicating widespread microglial activation<sup>13</sup>. It is unclear whether changes in cellular and soluble inflammatory markers represent underlying etiology, a consequence of disease progression, or associated epiphenomena.

Non-steroidal anti-inflammatory drugs (NSAIDs) inhibit cyclooxygenase (COX) enzymes, which catalyze the metabolism of arachidonic acids to prostanoids. COX-2 and its products play an important physiological role in synaptic plasticity and long-term potentiation and may also contribute to neuropathology by enhancing glutamate excitotoxicity, promoting neuronal cell death, and oxidizing endogenous cannabinoids<sup>14,15</sup>. Recent meta-analyses suggest a potential role of adjunctive COX-2 inhibitors in the treatment of depression<sup>16</sup> and first-episode schizophrenia<sup>17,18</sup>, with additional small studies suggesting possible benefit in neurodevelopmental conditions including autism spectrum disorder (ASD)<sup>19,20</sup>. Behavioral effects of COX inhibition may relate not only to anti-inflammatory activity but also to direct effects on neuronal function and synaptic transmission. Consensus guidelines on the use of anti-inflammatory therapy in children with PANDAS suggest NSAIDs as first-line options for patients with mild impairment<sup>21</sup>. However, a recent systematic review of treatment for PANS/PANDAS found insufficient evidence to support this practice<sup>22</sup>. In adults with OCD, three small randomized-controlled trials have suggested modest symptom improvement with celecoxib as an adjunct to fluoxetine<sup>21</sup>, fluvoxamine<sup>23,24</sup>, or other selective serotonin reuptake inhibitors (SSRIs)<sup>25</sup>. This raises the possibility that COX-2 inhibition may be effective in a general OCD population<sup>26</sup>. However, no controlled studies to date have tested the effects of COX inhibitors in CO-OCD. The present study will determine the efficacy of the COX-2-selective inhibitor celecoxib as an adjunct to treatment-as-usual in children and youth with moderate-to-severe OCD.

## METHODS AND DESIGN

### Study design

The ACE-OCD trial is a randomised, quadruple-blinded, placebo-controlled, single-site study comparing a 12-week course of twice daily celecoxib with placebo as an adjunct to treatment-as-usual in children and youth with moderate-to-severe OCD between the ages of 7 and 18. The protocol was drafted in

1  
2 accordance with the SPIRIT (Standard Protocol Items: recommendations for Interventional Trials)  
3 statement<sup>27</sup>. The trial was registered at ClinicalTrials.gov prior to enrolment (NCT04673578). All  
4 parents/guardians participating in the study will give electronically-documented informed consent; child  
5 and youth participants will provide informed assent or consent.  
6

### 7 8 **Study setting**

9 This is a single-site study based at the British Columbia Children's Hospital (BCCH) Provincial OCD  
10 Program in Vancouver, BC, Canada. Study visits will be conducted virtually, utilizing electronic-consent  
11 and survey platforms through Research Electronic Data Capture (REDCap) and Zoom, an online  
12 videoconference platform that complies with the Personal Information Protection and Electronic  
13 Documents Act and the Personal Health Information Protection Act. Participants will continue to receive  
14 treatment-as-usual from their regular health care providers, which will not change as a result of  
15 participation in this study.  
16

### 17 18 **Patient selection**

19 Participants will be recruited from BCCH and based on self-referral through community pediatrics,  
20 psychiatry, and psychology practices. Participants may be receiving concurrent pharmacotherapy or  
21 psychotherapy according to their routine clinical care, constituting "treatment-as-usual" as long as there  
22 have been no changes in the preceding 4 weeks and during the study period. They must have a previous  
23 diagnosis of OCD. Participants with PANS or PANDAS who also meet diagnostic criteria for OCD are  
24 eligible to participate. Refer to Table 1 for full inclusion and exclusion criteria.  
25

### 26 27 **Allocation and randomization**

28 Participants will be randomly assigned to either placebo or celecoxib with a 1:1 allocation as per a  
29 computer-generated randomization schedule stratified by baseline CY-BOCS score (16-23 versus  $\geq 24$ )  
30 using permuted blocks of random sizes of 2 and 4. Specific information regarding the allocation sequence  
31 will be stored in a separate document with access restricted to the study's statistician, the Research  
32 Pharmacist, and a Research Assistant (RA) not involved in the study. The block sizes will not be disclosed  
33 to trial implementers.  
34

### 35 36 **Blinding**

37 Trial participants, investigators, care providers, and outcome assessors will be blinded to treatment  
38 allocation. Placebo capsules will be identical in appearance to celecoxib capsules. Unique randomization  
39 codes will be used for each participant to avoid inadvertent loss of blinding for all participants in the event  
40 that one is unblinded. Data analysis and manuscript writing will be performed after unblinding once data  
41 have been cleaned for primary and secondary endpoints and AEs. Participants will be provided with an  
42 option to be contacted and informed of their allocation at that time. Emergency unblinding will occur only  
43 in exceptional circumstances when required to maintain participant safety – that is, when knowledge of  
44 the actual treatment is essential for further management. The blind will be maintained as far as possible  
45 and will not be disclosed to other study personnel unless required for patient management. Unblinding  
46 will not be a reason for study drug discontinuation.  
47

### 48 49 **Sample size calculation**

50 The sample size of 80 participants (40 per arm) was estimated on the basis of the primary hypothesis. If  
51 we assume a power to detect a minimally clinically significant between-group difference in CY-BOCS  
52 scores of 2.5 with an SD of 5 (equivalent to a Cohen's d effect size of 0.5 and roughly based on two  
53 existing studies of adjunctive celecoxib in adults<sup>23,24</sup>), a correlation of 0.5 between baseline and final CY-  
54 BOCS score, and a sample size of 40 participants per arm, we will have power of 80% to detect a between-  
55 group difference using a directional, one-tailed alpha (celecoxib < placebo) using analysis of covariance.  
56  
57  
58

1  
2 Missing follow-up data due to attrition will be imputed (as described in detail in the Statistical Analysis  
3 section below). Our recruitment target is similar to pilot studies of adjunctive celecoxib in other  
4 psychiatric disorders<sup>19</sup>.  
5

### 6 **Interventions**

7 Eligible patients will be randomized to a 12-week course of either celecoxib (generic form) or placebo  
8 containing microcrystalline cellulose. Participants receiving celecoxib with weight between 10-25 kg,  
9 inclusive, will receive 50 mg twice daily (2-5 mg/kg per dose); those >25 kg will receive 100 mg twice  
10 daily as per FDA-approved pediatric dosing in children (maximum 4 mg/kg per dose). The placebo  
11 capsule is effectively indistinguishable from that of the drug. Participants will be instructed to take the  
12 capsule with food to reduce the risk of gastrointestinal side effects. Those unable to swallow a capsule  
13 may sprinkle the contents on moist food, given similar pharmacokinetics compared to an intact capsule<sup>28</sup>.  
14 Adherence will be documented by capsule count and adherence questionnaires. Weekly adherence  
15 reminders will be provided by email or text. Participants will also be asked to maintain an electronic diary  
16 documenting the first dose, missed doses, AEs, and changes to the usual way they take the capsule.  
17  
18  
19

### 20 **Participant schedule and follow-up**

21 Prior to their first study visit, parents/guardians of participants who provide informed consent will  
22 complete a full eligibility screening questionnaire followed by a diagnostic interview that includes the  
23 Mini International Neuropsychiatric Interview for Children and Adolescents (MINI-Kid), a short  
24 structured interview that covers a broad range of DSM-5 psychiatric diagnoses in children and  
25 adolescents<sup>29</sup>. Participants and their parents who are eligible to proceed to the first study visit will  
26 complete a demographic/medical questionnaire and participant perspective questionnaire (PPQ) via  
27 REDCap prior to the first study visit.  
28  
29

30 Study visits will proceed according to the flow chart in Figure 1. Measures completed by a study physician  
31 at the first visit include the CY-BOCS<sup>30</sup>; Clinical Global Impression (CGI) scales<sup>31</sup>; review of diagnostic  
32 criteria for PANS/PANDAS, tic disorders, and restricted food intake<sup>6</sup>, clinician treatment expectancy, and  
33 clinician experience of remote study visits. Participants who continue to meet eligibility criteria after  
34 Study Visit 1 will be provided with a requisition for monitoring blood work if not already completed  
35 (CBC, Cr, AST, ALT, electrolytes, pregnancy test). Participants will have the option to consent to  
36 participation in an ancillary study for biosample collection (blood, saliva, buccal swab, and stool) for  
37 future analyses of inflammatory markers.  
38  
39

40 For participants who remain eligible for randomization, the BCCH Pharmacy will dispense the study drug  
41 or placebo according to an allocation sequence provided to them by the team's statistician at a dose based  
42 on the patient's weight. For Visits 2 and 3, parents/participants will again complete a REDCap survey  
43 prior to each visit, including adherence and AE questionnaires. Participants will be provided with a  
44 requisition for blood work to be completed following Visit 3. Participants with ongoing symptoms (CY-  
45 BOCS>8) at Visit 3 will have the option to continue with a 12-week open-label extension with celecoxib,  
46 with a follow-up visit and monitoring blood work at 24 weeks. There is no cost to participate in the study.  
47  
48  
49

## 50 **OUTCOME PARAMETERS AND STATISTICAL ANALYSES**

### 51 **Primary Outcome**

52 The primary outcome is OCD severity as measured by total CY-BOCS score after 12 weeks in the  
53 celecoxib compared to placebo arm, adjusted for baseline OCD severity. This is a more powerful statistical  
54 approach in comparison to analysis of change scores<sup>32</sup>.  
55  
56  
57  
58  
59  
60



## **Secondary Outcomes**

Secondary outcomes include the following: (1) OCD severity after 6 weeks of treatment in the celecoxib compared to placebo arm, adjusted for baseline OCD severity; (2) difference in the proportion of participants achieving a clinically meaningful response (defined as a 25% reduction in the CY-BOCS score or CGI-I of 1 or 2 based on previous meta-analyses<sup>33</sup>) after 6 and 12 weeks of treatment in the celecoxib compared to placebo arm; (3) difference in the proportion of participants achieving clinical remission (CY-BOCS $\leq$ 14) after 6 and 12 weeks of treatment in the celecoxib compared to placebo arm; (4) mean clinical global impression of severity (CGI-S) after 6 and 12 weeks in the celecoxib compared to placebo arm, adjusted for baseline OCD severity; (5) mean clinical global impression of improvement (CGI-I) after 6 and 12 weeks in the celecoxib compared to placebo arm, adjusted for baseline OCD severity; (6) difference between celecoxib and placebo arms in the proportion of participants reporting AEs that are possibly, probably, or definitely related to the study intervention. Definitions of response and remission are applied as described previously to allow for cross-study comparability<sup>34</sup>.

## **Exploratory Outcomes**

Exploratory analyses will include determination of the associations among age, sex, race/ethnicity, BMI percentile, treatment at baseline, severity at baseline, presence/severity of PANS/PANDAS symptoms or tics at any time point based on clinician assessment, medical/psychiatric comorbidities, time since diagnosis, scores on parent perspective questionnaire items, clinician treatment expectancy, and the primary and secondary outcomes. Additional measures of severity will be included in exploratory analyses and collected at all time points, including self-report and parent-report versions of the CY-BOCS and Obsessive Compulsive Inventory – Child Version (OCI-CV) (Table 2).

## **Outcome measures**

*Children's Yale-Brown Obsessive Compulsive Scale (CY-BOCS)*: OCD severity will be assessed using the CY-BOCS, a gold-standard clinician report measure<sup>30</sup>. The CY-BOCS is the most widely used measure of clinician-rated OCD and its psychometric properties including validity and reliability have been supported across many studies<sup>35</sup>. It is comprised of two subscale total scores, Obsessions and Compulsions, each ranging from 0-20, with a higher score indicating greater symptom severity. These subscale scores are summed to provide a total score, ranging from 0 to 40, that is used to measure overall OCD symptom severity. We have also included additional items in the clinician assessment forms to allow calculation of a score for CY-BOCS-II, which has been recently validated and may be used in future studies<sup>36</sup>.

*Clinical global impression (CGI)*: The CGI scale includes single item, clinician-rated, 7-point Likert-type scales of severity and improvement. The CGI-S is a frequently-used measure for assessment of symptom severity across multiple psychiatric illnesses. Both face-to-face and video scoring are considered valid outcome measures suitable for use in trials of OCD treatment<sup>37</sup>. The CGI-I typically but not always tracks with CGI-S<sup>31</sup> and has been used to define treatment response in treatment trials of pediatric OCD<sup>33</sup>.

*Participant perspective questionnaire (PPQ)*: This is a study-specific questionnaire to be completed online by the participant and parent in conjunction with each study visit. Included measures are listed in Table 2.

*PANDAS/PANS scale*: Included in the PPQ, this rating scale assesses severity and change in PANS/PANDAS symptoms and is a parent self-report form based on criteria proposed by the PANS Consortium and described previously<sup>38</sup>. This measure has also been used to capture PANS exacerbation, as it asks the rater whether each current symptom had been possibly worse (1 point), dramatically worse

(2 points), new (3 points), or better/same (0 points) within the past week. The maximum score possible is 54<sup>38</sup>.

*Clinician assessment:* In addition to assessment of OCD severity, PANS/PANDAS diagnosis and review of tic symptoms/severity will be conducted by the clinician at all study visits. This will include CGI measures for tics and for food intake restriction (a PANS criterion). Clinicians will also complete several questions related to treatment expectancy and their experience of virtual study visits.

*Adverse events:* AEs will be systematically assessed at Study Visits 2 and 3 using a questionnaire adaptation of the Safety Monitoring Uniform Research Form (SMURF)<sup>39</sup>. The SMURF is an AE-elicitation tool specifically aimed at pediatric populations, developed by the NIMH-funded Research Units on Pediatric Psychopharmacology<sup>39</sup>. A checklist will also be included in participant electronic diaries to allow for standardization of reporting and to facilitate recall when completing the AE Questionnaire prior to the visit.

*Adherence:* Medication adherence questionnaires will be completed on REDCap by participants prior to Visits 2 and 3 and will be reviewed with the family by the RA and study physician. This will consist of two questions regarding the frequency with which participants have taken all doses or missed one dose, with the response rated on a visual analogue scale. An open-ended question will be included regarding the reason for any missed doses. Adherence will also be assessed by capsule count at the end of the study.

### **Safety monitoring and interim analysis**

This study will be reviewed by a Data Safety and Monitoring Board (DSMB). An interim analysis of recruitment rates and AEs will be conducted after the first 10 patients or the first year of recruitment. Unblinding of data will occur only at the request of the DSMB by a statistician not directly involved in the conduct of the study. No interim efficacy analysis is planned. Individual participants may be asked to leave the study for their own safety, in which case consensus of at least two study physicians will be required. Individual participants who withdraw from or complete the study will continue follow-up with their regular care providers.

### **Statistical analyses**

Analyses will be carried out according to the intention-to-treat principle such that participants will be analyzed according to the group to which they were randomized regardless of adherence. Descriptive statistics will be conducted on baseline variables to evaluate the characteristics of the total sample and subsamples in each treatment condition. The primary analyses will be conducted on two sets of data. First, the analyses will be conducted on complete case data, which is defined as the set of subjects without missing data on the variables included in the particular statistical model. Second, missing data will be multiply imputed using the multivariate imputation by chained equations approach, which is appropriate when data are missing at random or are missing completely at random<sup>40</sup>. The imputation method for all variables will be semi-parametric predictive mean matching, which restricts imputations to the observed values in the data set. Common diagnostics, including visual inspection of trace plots and examination of R-hat values, will be used to ensure the validity of the imputation procedure. The imputation model will include baseline demographic and clinical characteristics used to form subgroups for exploratory analyses, treatment condition, baseline scores on outcomes measures, as well as observed follow-up scores on the outcomes of interest. The imputation model will create forty imputed data sets, on which statistical analyses will be performed. Statistical estimates will be pooled over the 40 imputed data sets using the Barnard-Rubin procedure to estimate pooled standard errors and degrees of freedom<sup>41</sup>.

1  
2 *Primary Analysis:* The primary analyses will compare the celecoxib to the placebo group on the outcome  
3 of interest at weeks 6 and 12, adjusting for baseline scores on the outcome, using ANCOVA for continuous  
4 outcomes and logistic regression for categorical outcomes. Additionally, baseline CY-BOCS will be  
5 included as a covariate in all analyses, even when CY-BOCS is not the outcome variable. ANCOVA  
6 produces unbiased treatment effect estimates and less variance in the treatment effect as compared to the  
7 commonly-used linear mixed model, resulting in superior statistical power<sup>32</sup>. All continuous outcomes  
8 believed to be generated from a Gaussian distribution will be analyzed using this approach.  
9

10  
11 The primary contrast for this study will be the between-group difference (celecoxib vs. placebo) in CY-  
12 BOCS score at 12 weeks, adjusted for baseline CY-BOCS score, using multiply-imputed data and  
13 complete case data. The estimated between-group difference using the multiply-imputed data will be  
14 considered the primary estimate; the estimated between-group difference using complete case data will  
15 be considered secondary. The statistical significance threshold for this analysis will be set at a one-sided  
16 alpha = 0.05, to test whether the celecoxib group has lower adjusted 12-week CY-BOCS scores compared  
17 to the placebo group. For this analysis, we will report the between-group point estimate, 95% confidence  
18 value, and p-value to 3 decimal places. A p-value less than 0.001 will be reported as  $p < 0.001$ . Additional  
19 analyses of between-group differences in secondary outcomes and in symptom severity at the midpoint  
20 assessment will be considered descriptive and will be described using point estimates and 95% confidence  
21 intervals.  
22  
23

24  
25 *Secondary Analysis:* Secondary analyses will include analysis of the proportion of patients in each group  
26 who achieve a 25% reduction in CY-BOCS score from baseline or CGI-I of 1 or 2 (treatment response)  
27 and who achieve a CY-BOCS score  $\leq 14$  (remission). Logistic regression will analyze between-group  
28 differences in this binary outcome (achieved  $\geq 25\%$  reduction versus did not), adjusting for baseline CY-  
29 BOCS score. Similarly, logistic regression will examine group differences in a binary AE variable  
30 (experienced at least one AE versus did not), also adjusting for baseline CY-BOCS score. Association  
31 between OCD symptoms, PGI, and treatment expectancy will be estimated using linear regression  
32 modelling with treatment group, age, sex, BMI percentile, race/ethnicity, PANS/PANDAS status, and tic  
33 status as covariates.  
34  
35

36 *Other Analysis:* Data collected during the 12-week extension period will be reported in a descriptive  
37 fashion, e.g., number of observations, percentages, means, and standard deviations.  
38  
39

### 40 **Patient and public involvement**

41 The research question addressed by the study has been informed by discussions with families interested  
42 in trialing NSAID therapy and the current lack of evidence base to inform treatment recommendations.  
43 Feedback from families has been incorporated into trial design, including addition of an open-label phase.  
44 Procedures for recruitment, assessment, BioBank sample collection, outcome assessments, follow-up, and  
45 results dissemination are common to other studies in the BCCH Provincial OCD Program that have  
46 provided both patients and families with an opportunity for input. Because this trial is unique in  
47 incorporating virtual/remote study visits for a pharmacological intervention within a pediatric psychiatric  
48 population in BC, participants' perspectives on their participation may provide critical information  
49 relevant to the design of future studies.  
50  
51  
52

## 53 **ETHICS AND DISSEMINATION**

### 54 **Data collection and confidentiality**

55 All data are handled confidentially and the information in the datasets for analyses is non-identifiable.  
56  
57  
58  
59

### **Ethics**

A No Objection Letter has been received from Health Canada. This study has been approved by the University of British Columbia / Children's and Women's Health Centre of British Columbia Research Ethics Board.

### **Withdrawal**

Patients will be informed of their right to withdraw from the study without explanation at any time. In case of patient withdrawal, they will be asked for permission for prospective collection and later use of their hospital record data after their withdrawal.

### **Dissemination plan**

The findings will be disseminated in peer-reviewed academic journals and presentations to multiple stakeholders including patients, parents, and health care providers.

## **DISCUSSION**

This study will be the first to assess the efficacy of celecoxib in pediatric OCD. Multiple lines of evidence suggest behavioural effects of COX inhibition, which may relate not only to anti-inflammatory activity but also to direct effects on neuronal function and synaptic transmission. While clinical phenotyping will identify children meeting criteria for PANS/PANDAS, this work will also bring much-needed attention to a heterogeneous population of patients with OCD and may inform future trials of immune-modulating therapies. Participant perspectives on treatment expectancy, outcomes, and trial participation will be used to inform the design of future studies in this population.

***Rationale for use of a COX-2-selective versus COX-1-selective inhibitor:*** While all NSAIDs appear to have anti-inflammatory, antipyretic, and analgesic properties attributable to prostaglandin inhibition, they vary with respect to COX selectivity<sup>42</sup> and may have neuroprotective effects not directly related to their classic anti-inflammatory activity<sup>43,44</sup>. In the CNS, modulation of glutamate, serotonin, norepinephrine, and endocannabinoid signalling has been primarily demonstrated with COX-2 rather than COX-1 inhibitors<sup>14,15,45-47</sup>. Other than a negative RCT of naproxen in geriatric depression<sup>48</sup> and a study of adjuvant aspirin in schizophrenia<sup>49</sup>, few RCTs have evaluated non-selective NSAIDs in primary psychiatric disorders. Given the significance of different COX isoforms and their unknown relative "potencies" in the CNS, careful attention must be given to selection and evaluation of specific NSAIDs to better understand their neurobiology and clinical efficacy. This study uses celecoxib rather than naproxen given evidence of benefit in adults with OCD and pre-clinical data pointing to modulation of serotonin and glutamate. Celecoxib is also associated with fewer gastrointestinal side effects in adults.

***Rationale for dosing regimen:*** The US Food and Drug Administration has approved the use of celecoxib in the pediatric population for the management of juvenile idiopathic arthritis (JIA)<sup>50</sup> and is available in the US to children from ages two and up based on a non-inferiority study comparing celecoxib with naproxen<sup>51</sup>. A follow-up registry study from routine clinical practice included 274 children on NSAIDs and found that AEs were similar for non-selective NSAIDs and celecoxib, and that no serious AEs were attributed to NSAID use over a mean duration of treatment of 11-13 months<sup>52</sup>. The dosages used were within the range of those tested in children with JIA over 12 weeks (3-6 mg/kg twice daily)<sup>51</sup>. To avoid exceeding plasma levels associated with the 6 mg/kg suspension, the FDA-approved capsule dosing will be used in this study.

***Strengths and limitations of this study:*** While an RCT of naproxen in PANDAS is currently recruiting

(NCT04015596), the present study has broader inclusion criteria based on emerging evidence for inflammatory dysregulation in “classic” OCD and existing data in adults. The pragmatic approach of adding celecoxib to treatment-as-usual is a potential strength reflecting typical use in clinical practice. Because of this, our study population is likely to be more heterogeneous than that of existing adult studies. It is difficult to predict to what extent and in which direction selection bias will affect the representativeness of the study population, as in our clinical experience families often consider anti-inflammatory therapy at all stages and severities of the disorder.

A subset of children may benefit from immune-modulating therapies, but there are no validated strategies for identifying these individuals. This study incorporates biosample collection pre-and post-intervention, allowing not only for safety monitoring but also for future analyses of pro-inflammatory markers. Given the paucity of data from interventional trials examining longitudinal markers of inflammation and treatment response in pediatric OCD, this will generate much-needed preliminary data to inform further studies of immune-related biomarkers. Due to funding limitations, these samples will be allocated for future analyses.

This study incorporates questionnaires aimed at better understanding participants’ experiences virtual study visits, which is a novel format for psychopharmaceutical trials at our centre in the context of the COVID-19 pandemic and will increase equitable access to opportunities for research participation. We expect that these data will inform the design of future studies incorporating remote research visits and clinical care.

## CONCLUSIONS

NSAIDs are common in clinical practice and referenced in both adult and pediatric treatment guidelines for OCD, but no controlled studies have evaluated the effects of COX inhibitors in childhood-onset OCD. This study will be the first to assess the efficacy and safety of adjunctive celecoxib in this population and will inform clinical management of children and youth with OCD.

1  
2  
3  
4  
5  
6  
7  
8  
9  
10  
11  
12  
13  
14  
15  
16  
17  
18  
19  
20  
21  
22  
23  
24  
25  
26  
27  
28  
29  
30  
31  
32  
33  
34  
35  
36  
37  
38  
39  
40  
41  
42  
43  
44  
45  
46  
47  
48  
49  
50  
51  
52  
53  
54  
55  
56  
57  
58  
59  
60  
**REFERENCES**

1. Murray CJ, Lopez AD. Global mortality, disability, and the contribution of risk factors: Global Burden of Disease Study. *Lancet* 1997;349(9063):1436-42. doi: 10.1016/S0140-6736(96)07495-8
2. Hollander E, Doernberg E, Shavitt R, et al. The cost and impact of compulsivity: A research perspective. *Eur Neuropsychopharmacol* 2016;26(5):800-9. doi: 10.1016/j.euroneuro.2016.02.006
3. do Rosario-Campos MC, Leckman JF, Curi M, et al. A family study of early-onset obsessive-compulsive disorder. *Am J Med Genet B Neuropsychiatr Genet* 2005;136B(1):92-7. doi: 10.1002/ajmg.b.30149
4. Chabane N, Delorme R, Millet B, et al. Early-onset obsessive-compulsive disorder: a subgroup with a specific clinical and familial pattern? *J Child Psychol Psychiatry* 2005;46(8):881-7. doi: 10.1111/j.1469-7610.2004.00382.x
5. Swedo SE, Leonard HL, Garvey M, et al. Pediatric autoimmune neuropsychiatric disorders associated with streptococcal infections: clinical description of the first 50 cases. *Am J Psychiatry* 1998;155(2):264-71. doi: 10.1176/ajp.155.2.264
6. Chang K, Frankovich J, Cooperstock M, et al. Clinical evaluation of youth with pediatric acute-onset neuropsychiatric syndrome (PANS): recommendations from the 2013 PANS Consensus Conference. *J Child Adolesc Psychopharmacol* 2015;25(1):3-13. doi: 10.1089/cap.2014.0084
7. Kohler-Forsberg O, Petersen L, Gasse C, et al. A Nationwide Study in Denmark of the Association Between Treated Infections and the Subsequent Risk of Treated Mental Disorders in Children and Adolescents. *JAMA Psychiatry* 2019;76(3):271-79. doi: 10.1001/jamapsychiatry.2018.3428
8. Orlovska S, Vestergaard CH, Bech BH, et al. Association of Streptococcal Throat Infection With Mental Disorders: Testing Key Aspects of the PANDAS Hypothesis in a Nationwide Study. *JAMA Psychiatry* 2017;74(7):740-46. doi: 10.1001/jamapsychiatry.2017.0995 [published Online First: 2017/05/26]
9. Slattery MJ, Dubbert BK, Allen AJ, et al. Prevalence of obsessive-compulsive disorder in patients with systemic lupus erythematosus. *J Clin Psychiatry* 2004;65(3):301-6.
10. Hounie AG, Pauls DL, do Rosario-Campos MC, et al. Obsessive-compulsive spectrum disorders and rheumatic fever: a family study. *Biol Psychiatry* 2007;61(3):266-72. doi: 10.1016/j.biopsych.2006.02.021
11. Mataix-Cols D, Frans E, Perez-Vigil A, et al. A total-population multigenerational family clustering study of autoimmune diseases in obsessive-compulsive disorder and Tourette's/chronic tic disorders. *Mol Psychiatry* 2017 doi: 10.1038/mp.2017.215
12. Westwell-Roper C, Williams KA, Samuels J, et al. Immune-Related Comorbidities in Childhood-Onset Obsessive Compulsive Disorder: Lifetime Prevalence in the Obsessive Compulsive Disorder Collaborative Genetics Association Study. *J Child Adolesc Psychopharmacol* 2019;29(8):615-24. doi: 10.1089/cap.2018.0140
13. Attwells S, Setiawan E, Wilson AA, et al. Inflammation in the Neurocircuitry of Obsessive-Compulsive Disorder. *JAMA Psychiatry* 2017;74(8):833-40. doi: 10.1001/jamapsychiatry.2017.1567
14. Yang H, Chen C. Cyclooxygenase-2 in synaptic signaling. *Curr Pharm Des* 2008;14(14):1443-51. doi: 10.2174/138161208784480144
15. Chen C, Magee JC, Bazan NG. Cyclooxygenase-2 regulates prostaglandin E2 signaling in hippocampal long-term synaptic plasticity. *J Neurophysiol* 2002;87(6):2851-7. doi: 10.1152/jn.2002.87.6.2851

16. Faridhosseini F, Sadeghi R, Farid L, et al. Celecoxib: a new augmentation strategy for depressive mood episodes. A systematic review and meta-analysis of randomized placebo-controlled trials. *Hum Psychopharmacol* 2014;29(3):216-23. doi: 10.1002/hup.2401
17. Marini S, De Berardis D, Vellante F, et al. Celecoxib Adjunctive Treatment to Antipsychotics in Schizophrenia: A Review of Randomized Clinical Add-On Trials. *Mediators Inflamm* 2016;2016(1):3476240-8.
18. Zheng W, Cai D-B, Yang X-H, et al. Adjunctive celecoxib for schizophrenia: A meta-analysis of randomized, double-blind, placebo-controlled trials. *J Psychiatr Res* 2017;92:139-46.
19. Sethi R, Gomez-Coronado N, Walker AJ, et al. Neurobiology and Therapeutic Potential of Cyclooxygenase-2 (COX-2) Inhibitors for Inflammation in Neuropsychiatric Disorders. *Front Psychiatry* 2019;10:605. doi: 10.3389/fpsyt.2019.00605
20. Asadabadi M, Mohammadi MR, Ghanizadeh A, et al. Celecoxib as adjunctive treatment to risperidone in children with autistic disorder: a randomized, double-blind, placebo-controlled trial. *Psychopharmacology (Berl)* 2013;225(1):51-9. doi: 10.1007/s00213-012-2796-8
21. Thienemann M, Murphy T, Leckman J, et al. Clinical Management of Pediatric Acute-Onset Neuropsychiatric Syndrome: Part I-Psychiatric and Behavioral Interventions. *J Child Adolesc Psychopharmacol* 2017;27(7):566-73. doi: 10.1089/cap.2016.0145
22. Sigrá S, Hesselmark E, Bejerot S. Treatment of PANDAS and PANS: a systematic review. *Neurosci Biobehav Rev* 2018;86:51-65. doi: 10.1016/j.neubiorev.2018.01.001
23. Sayyah M, Boostani H, Pakseresht S, et al. A preliminary randomized double-blind clinical trial on the efficacy of celecoxib as an adjunct in the treatment of obsessive-compulsive disorder. *Psychiatry Res* 2011;189(3):403-6. doi: 10.1016/j.psychres.2011.01.019
24. Shalbfafan M, Mohammadinejad P, Shariat SV, et al. Celecoxib as an Adjuvant to Fluvoxamine in Moderate to Severe Obsessive-compulsive Disorder: A Double-blind, Placebo-controlled, Randomized Trial. *Pharmacopsychiatry* 2015;48(4-5):136-40. doi: 10.1055/s-0035-1549929
25. Shahini S, Talaei A, Shalbfafan M, et al. Effects of Celecoxib Adjunct to Selective Serotonin Reuptake Inhibitors on Obsessive-compulsive. *Basic and Clinical Neuroscience* 2021; 12(4):489-98.
26. Katzman MA, Bleau P, Blier P, et al. Canadian clinical practice guidelines for the management of anxiety, posttraumatic stress and obsessive-compulsive disorders. *BMC Psychiatry* 2014;14 Suppl 1:S1. doi: 10.1186/1471-244X-14-S1-S1
27. Chan AW, Tetzlaff JM, Gotzsche PC, et al. SPIRIT 2013 explanation and elaboration: guidance for protocols of clinical trials. *BMJ* 2013;346:e7586. doi: 10.1136/bmj.e7586
28. Krishnaswami S, Hutmacher MM, Robbins JL, et al. Dosing celecoxib in pediatric patients with juvenile rheumatoid arthritis. *J Clin Pharmacol* 2012;52(8):1134-49. doi: 10.1177/0091270011412184
29. Sheehan DV, Sheehan KH, Shytle RD, et al. Reliability and validity of the Mini International Neuropsychiatric Interview for Children and Adolescents (MINI-KID). *J Clin Psychiatry* 2010;71(3):313-26. doi: 10.4088/JCP.09m05305whi
30. Goodman WK, Price LH, Rasmussen SA, et al. The Yale-Brown Obsessive Compulsive Scale. I. Development, use, and reliability. *Arch Gen Psychiatry* 1989;46(11):1006-11.
31. Busner J, Targum SD. The clinical global impressions scale: applying a research tool in clinical practice. *Psychiatry (Edgmont)* 2007;4(7):28-37.
32. O'Connell NS, Dai L, Jiang Y, et al. Methods for Analysis of Pre-Post Data in Clinical Research: A Comparison of Five Common Methods. *J Biom Biostat* 2017;8(1):1-8. doi: 10.4172/2155-6180.1000334
33. McGuire JF, Piacentini J, Lewin AB, et al. A Meta-Analysis of Cognitive Behavior Therapy and Medication for Child Obsessive-Compulsive Disorder: Moderators of Treatment Efficacy, Response, and Remission. *Depress Anxiety* 2015;32(8):580-93. doi: 10.1002/da.22389

34. Storch EA, Lewin AB, De Nadai AS, et al. Defining treatment response and remission in obsessive-compulsive disorder: a signal detection analysis of the Children's Yale-Brown Obsessive Compulsive Scale. *J Am Acad Child Adolesc Psychiatry* 2010;49(7):708-17. doi: 10.1016/j.jaac.2010.04.005 [published Online First: 2010/07/09]
35. Rapp AM, Bergman RL, Piacentini J, et al. Evidence-Based Assessment of Obsessive-Compulsive Disorder. *J Cent Nerv Syst Dis* 2016;8:13-29. doi: 10.4137/JCNSD.S38359
36. Storch EA, McGuire JF, Wu MS, et al. Development and Psychometric Evaluation of the Children's Yale-Brown Obsessive-Compulsive Scale Second Edition. *J Am Acad Child Adolesc Psychiatry* 2019;58(1):92-98. doi: 10.1016/j.jaac.2018.05.029 [published Online First: 2018/12/24]
37. Bourredjem A, Pelissolo A, Rotge JY, et al. A video Clinical Global Impression (CGI) in obsessive compulsive disorder. *Psychiatry Res* 2011;186(1):117-22. doi: 10.1016/j.psychres.2010.06.021
38. Murphy TK, Patel PD, McGuire JF, et al. Characterization of the pediatric acute-onset neuropsychiatric syndrome phenotype. *J Child Adolesc Psychopharmacol* 2015;25(1):14-25. doi: 10.1089/cap.2014.0062
39. Greenhill LL, Vitiello B, Fisher P, et al. Comparison of increasingly detailed elicitation methods for the assessment of adverse events in pediatric psychopharmacology. *J Am Acad Child Adolesc Psychiatry* 2004;43(12):1488-96. doi: 10.1097/01.chi.0000142668.29191.13
40. van Buuren S, Groothuis-Oudshoorn K. mice: Multivariate Imputation by Chained Equations in R. *Journal of Statistical Software* 2011;45(3):1. doi: 10.18637/jss.v045.i03
41. Barnard J, Rubin DB. Small-Sample Degrees of Freedom with Multiple Imputation. *Biometrika* 1999;86(4):948-55.
42. Gan TJ. Diclofenac: an update on its mechanism of action and safety profile. *Curr Med Res Opin* 2010;26(7):1715-31. doi: 10.1185/03007995.2010.486301
43. Calvo-Rodriguez M, Nunez L, Villalobos C. Non-steroidal anti-inflammatory drugs (NSAIDs) and neuroprotection in the elderly: a view from the mitochondria. *Neural Regen Res* 2015;10(9):1371-2. doi: 10.4103/1673-5374.165219
44. Diaz-Gonzalez F, Sanchez-Madrid F. NSAIDs: learning new tricks from old drugs. *Eur J Immunol* 2015;45(3):679-86. doi: 10.1002/eji.201445222
45. Lin T-Y, Lu C-W, Wang C-C, et al. Cyclooxygenase 2 inhibitor celecoxib inhibits glutamate release by attenuating the PGE2/EP2 pathway in rat cerebral cortex endings. *J Pharmacol Exp Ther* 2014;351(1):134-45.
46. Sandrini M, Vitale G, Pini LA. Effect of rofecoxib on nociception and the serotonin system in the rat brain. *Inflamm Res* 2002;51(3):154-9.
47. Johansson D, Falk A, Marcus MM, et al. Celecoxib enhances the effect of reboxetine and fluoxetine on cortical noradrenaline and serotonin output in the rat. *Prog Neuropsychopharmacol Biol Psychiatry* 2012;39(1):143-8. doi: 10.1016/j.pnpbp.2012.06.003
48. Fields C, Drye L, Vaidya V, et al. Celecoxib or naproxen treatment does not benefit depressive symptoms in persons age 70 and older: findings from a randomized controlled trial. *Am J Geriatr Psychiatry* 2012;20(6):505-13. doi: 10.1097/JGP.0b013e318227f4da
49. Laan W, Grobbee DE, Selten JP, et al. Adjuvant aspirin therapy reduces symptoms of schizophrenia spectrum disorders: results from a randomized, double-blind, placebo-controlled trial. *J Clin Psychiatry* 2010;71(5):520-7. doi: 10.4088/JCP.09m05117yel
50. Young D. FDA advisers endorse Celebrex for juvenile rheumatoid arthritis: lack of studies in children raises safety concerns. *Am J Health Syst Pharm* 2007;64(1):11-2. doi: 10.2146/news070001
51. Foeldvari I, Szer IS, Zemel LS, et al. A prospective study comparing celecoxib with naproxen in children with juvenile rheumatoid arthritis. *J Rheumatol* 2009;36(1):174-82. doi: 10.3899/jrheum.080073



- 1  
2 52. Sobel RE, Lovell DJ, Brunner HI, et al. Safety of celecoxib and nonselective nonsteroidal anti-  
3 inflammatory drugs in juvenile idiopathic arthritis: results of the Phase 4 registry. *Pediatr*  
4 *Rheumatol Online J* 2014;12:29. doi: 10.1186/1546-0096-12-29  
5  
6 53. Stewart SE, Stack DE, Farrell C, et al. Effectiveness of intensive residential treatment (IRT) for  
7 severe, refractory obsessive-compulsive disorder. *J Psychiatr Res* 2005;39(6):603-9. doi:  
8 10.1016/j.jpsychires.2005.01.004  
9  
10 54. Forrest CB, Bevans KB, Pratiwadi R, et al. Development of the PROMIS (R) pediatric global health  
11 (PGH-7) measure. *Qual Life Res* 2014;23(4):1221-31. doi: 10.1007/s11136-013-0581-8  
12  
13 55. Mara CA, Kashikar-Zuck S, Cunningham N, et al. Development and Psychometric Evaluation of the  
14 PROMIS Pediatric Pain Intensity Measure in Children and Adolescents with Chronic Pain. *J*  
15 *Pain* 2020 doi: 10.1016/j.jpain.2020.04.001  
16  
17 56. Lewin AB, Peris TS, Lindsey Bergman R, et al. The role of treatment expectancy in youth receiving  
18 exposure-based CBT for obsessive compulsive disorder. *Behav Res Ther* 2011;49(9):536-43.  
19 doi: 10.1016/j.brat.2011.06.001  
20  
21 57. De Nadai A, Nagpal PS, Piacentini J, et al. Contemporary models of pediatric obsessive-compulsive  
22 disorder: An evaluation with a large clinical sample. *Psychiatry Res* 2015;229(1-2):620-2. doi:  
23 10.1016/j.psychres.2015.03.034 [published Online First: 2015/05/25]  
24  
25 58. Foa EB, Coles M, Huppert JD, et al. Development and validation of a child version of the obsessive  
26 compulsive inventory. *Behav Ther* 2010;41(1):121-32. doi: 10.1016/j.beth.2009.02.001  
27 [published Online First: 2010/02/23]  
28  
29 59. Pflugeisen BM, Rebar S, Reedy A, et al. Assessment of clinical trial participant patient satisfaction:  
30 a call to action. *Trials* 2016;17(1):483. doi: 10.1186/s13063-016-1616-6  
31  
32  
33  
34  
35  
36  
37  
38  
39  
40  
41  
42  
43  
44  
45  
46  
47  
48  
49  
50  
51  
52  
53  
54  
55  
56  
57  
58  
59  
60

## FIGURE LEGENDS

**Figure 1.** Flow diagram of study visits and assessments.

<sup>a</sup>MINI-Kid diagnostic interview administered by phone with the participant and parent present.

<sup>b</sup>Screening and study visits may be conducted virtually according to patient preference and current COVID-19 restrictions.

<sup>c</sup>Height, weight, and blood pressure will be determined either on-site or by a participant's regular care provider.

<sup>d</sup>Participants will inform study staff of the date and time of their first dose. Weekly reminders regarding compliance and completion of the participant e-diary as required will be sent via email, phone, or text according to participant preference and consent.

## ACKNOWLEDGEMENTS

The authors gratefully acknowledge clinical trial support provided by the BC Children's Hospital Clinical Research Support Unit, including consultation on study design and methodology by Peter Subrt and Jennifer Claydon. We also thank BCCH Research Pharmacist Erin Adams, Delta Prescriptions Inc. Pharmacist Michael Millman, and BCCH Clinical Laboratory/BioBank staff Veronica Chow and Vi Nguyen for input on protocol design and implementation.

## AUTHORS' CONTRIBUTIONS

CWR drafted the initial protocol under the supervision of SES, who revised for significant content. JB created the statistical analysis plan. MM, SB, DE, and LBT provided clinical input into study design and monitoring. AA, ZN, BL, and CL drafted subsections of the initial protocol and facilitated research ethics board submission. All authors revised the protocol and approved of the final version to be submitted.

## FUNDING STATEMENT

This work is supported by an International OCD Foundation Young Investigator Award to CWR.

## COMPETING INTERESTS

The authors declare that the research was conducted in the absence of any commercial or financial relationships that could be construed as a potential conflict of interest.

## TABLES

**Table 1.** Inclusion and exclusion criteria.

| Criterion | Items                                                                                                                                                                                                                                                                                                                                                                                                                                                                                                                                                                                                                                                                                                                                                                                                                                                                                                                                                                                                                                                                                                                                                                                                                                                                                                                                                                                                                                                                                                                                                                                                                                                                                                                                                                                                                                                                                                                                                                                                                                                                                                                                                                                                                                                                                                                                                                                                                                                                                                                                                                                                                                                                                                                                                                                                                      |
|-----------|----------------------------------------------------------------------------------------------------------------------------------------------------------------------------------------------------------------------------------------------------------------------------------------------------------------------------------------------------------------------------------------------------------------------------------------------------------------------------------------------------------------------------------------------------------------------------------------------------------------------------------------------------------------------------------------------------------------------------------------------------------------------------------------------------------------------------------------------------------------------------------------------------------------------------------------------------------------------------------------------------------------------------------------------------------------------------------------------------------------------------------------------------------------------------------------------------------------------------------------------------------------------------------------------------------------------------------------------------------------------------------------------------------------------------------------------------------------------------------------------------------------------------------------------------------------------------------------------------------------------------------------------------------------------------------------------------------------------------------------------------------------------------------------------------------------------------------------------------------------------------------------------------------------------------------------------------------------------------------------------------------------------------------------------------------------------------------------------------------------------------------------------------------------------------------------------------------------------------------------------------------------------------------------------------------------------------------------------------------------------------------------------------------------------------------------------------------------------------------------------------------------------------------------------------------------------------------------------------------------------------------------------------------------------------------------------------------------------------------------------------------------------------------------------------------------------------|
| Inclusion | <ol style="list-style-type: none"> <li>1. Age 7-18 years</li> <li>2. Resident of British Columbia, Canada</li> <li>3. DSM-5 diagnosis of OCD based on (a) history of prior clinician assessment and (b) standardized interview</li> <li>4. Children's Yale-Brown Obsessive Compulsive Scale (CY-BOCS) score <math>\geq 16</math> (moderate to severe)</li> <li>5. Able to take medication twice daily in capsule form (in whole form or sprinkled contents)</li> <li>6. Negative pregnancy test (either serum or urine) in participants with child-bearing potential</li> <li>7. Use of highly effective and/or double barrier contraception, or abstinence, in participants with child-bearing potential</li> </ol>                                                                                                                                                                                                                                                                                                                                                                                                                                                                                                                                                                                                                                                                                                                                                                                                                                                                                                                                                                                                                                                                                                                                                                                                                                                                                                                                                                                                                                                                                                                                                                                                                                                                                                                                                                                                                                                                                                                                                                                                                                                                                                       |
| Exclusion | <ol style="list-style-type: none"> <li>1. Lifetime diagnosis of autism spectrum disorder, bipolar disorder, psychotic disorder, substance-use disorder, intellectual disability, significant head injury causing loss of consciousness, renal disease, liver disease, gastrointestinal bleeding, peptic ulcer disease, inflammatory bowel disease, severe or uncontrolled asthma, bleeding disorders, heart disease, heart failure, or hypertension</li> <li>2. Current major depressive episode, acute psychosis, active substance use, suicidality, or restriction of fluid intake</li> <li>3. Pregnant or breastfeeding during the study period</li> <li>4. Active infection or antibiotic treatment at baseline</li> <li>5. Allergy to celecoxib, sulfonamide compounds, or NSAIDs, including aspirin</li> <li>6. Current or previous regular use of immune-modulating therapies for treatment of OCD symptoms, at an effective anti-inflammatory dose (including NSAIDs, corticosteroids, or biologics)</li> <li>7. Use of NSAIDs at any dose at a frequency <math>\geq 3</math> times per week during the 2 months prior to randomization</li> <li>8. Current use of IV or oral corticosteroids</li> <li>9. Concurrent use of CYP2C9 inhibitors fluconazole, amiodarone, oxandrolone or methotrexate; CYP2C9 inducers including rifampin and phenobarbital; or any other drug that may interact with celecoxib and, in the opinion of study physicians, represents a potential safety risk</li> <li>10. Poor CYP2C9 metabolizer (i.e. CYP2C9*3/*3 genotype) based on clinical suspicion or previous genotyping</li> <li>11. Abnormality identified on baseline serology including leukocytosis, leukopenia, thrombocytopenia, anemia, abnormal renal function (Cr <math>&gt; 1.5</math> x upper limit of normal), or abnormal liver function (ALT, ALP, or AST <math>&gt; 1.5</math>x upper limit of normal)</li> <li>12. New medication started in the 4 weeks prior to baseline, or change in dose in the 2 weeks prior to baseline</li> <li>13. Changes in CBT or other psychotherapy in the 2 weeks prior to baseline (i.e. change in regular frequency, modality, or care provider)</li> <li>14. Notable other treatment changes during the study period (either pharmacotherapy or psychotherapy)</li> <li>15. No regular physician (family doctor or specialist) providing usual medical care</li> <li>16. Participant/parents unable to provide informed consent or assent or participate in self-care, adverse event (AE) reporting, or follow-up assessments</li> <li>17. Inability to have blood pressure measured within 2 months prior to enrollment (either on-site at BCCH or by a primary care provider)</li> <li>18. Intention of pregnancy in participants with child-bearing potential</li> </ol> |

**Table 2.** Description of measures included in the parent/participant perspective questionnaire.

| Measure                                                                                               | Outcome                                                                                                                                                                                                                                          |
|-------------------------------------------------------------------------------------------------------|--------------------------------------------------------------------------------------------------------------------------------------------------------------------------------------------------------------------------------------------------|
| Patient/Parent Global Impression scales for severity and improvement (PGI-S and PGI-I)                | Severity and improvement in OCD and tic symptoms, based on a standard 7-point Likert scale derived from the Clinician Global Impression scales <sup>53</sup> .                                                                                   |
| PANS Rating Scale                                                                                     | Severity and change in PANS/PANDAS symptoms <sup>38</sup>                                                                                                                                                                                        |
| National Institutes of Health PROMIS measures                                                         | Patient-reported measures of (a) global health, and (b) pain intensity, including 8 items overall <sup>54,55</sup> .                                                                                                                             |
| Treatment expectancy                                                                                  | Two items assuming assignment of the participant to either placebo or active drug . Rated on a 7-point Likert scale, previously linked with treatment response and lower attrition in a clinical trial of CBT for youth with OCD <sup>56</sup> . |
| Self-reported OCD severity                                                                            | Self-report CY-BOCS, combining scores for obsessions and compulsions to generate a total score out of 20, consistent with recommendations based on a recent study of CY-BOCS construct validity <sup>57</sup> .                                  |
| Self-report and parent-report versions of the Obsessive Compulsive Inventory – Child Version (OCI-CV) | 21-item self-report measure that assesses obsessive compulsive symptoms in children and adolescents aged 7 to 17 years over the preceding month <sup>58</sup> .                                                                                  |
| Post-visit questionnaire items                                                                        | Likert-scale and open-ended items querying participant experiences with virtual visits and trial participation using, based on previous work but tailored to this current study <sup>59</sup> .                                                  |

FIGURE 1



**Figure 1.** Flow diagram of study visits and assessments

<sup>a</sup> MINI-Kid diagnostic interview administered by phone with the participant and parent present.

<sup>b</sup>Screening and study visits may be conducted virtually according to patient preference and current COVID-19 restrictions.

<sup>c</sup>Height, weight, and blood pressure will be determined either on-site or by a participant's regular care provider.

<sup>d</sup>Participants will inform study staff of the date and time of their first dose. Weekly reminders regarding compliance and completion of the participant e-diary as required will be sent via email, phone, or text according to participant preference and consent.

# Reporting checklist for protocol of a clinical trial.

Based on the SPIRIT guidelines.

*Note that the main protocol for this study includes all items. This manuscript due to word count limitations includes only the following. For review purposes, refer to main SPIRIT checklist and protocol for further details.*

|                                                         |                     | Reporting Item                                                                                                                                                                             | Page Number           |
|---------------------------------------------------------|---------------------|--------------------------------------------------------------------------------------------------------------------------------------------------------------------------------------------|-----------------------|
| <b>Administrative information</b>                       |                     |                                                                                                                                                                                            |                       |
| Title                                                   | <a href="#">#1</a>  | Descriptive title identifying the study design, population, interventions, and, if applicable, trial acronym                                                                               | 1                     |
| Trial registration                                      | <a href="#">#2a</a> | Trial identifier and registry name. If not yet registered, name of intended registry                                                                                                       | 1                     |
| Trial registration: data set                            | <a href="#">#2b</a> | All items from the World Health Organization Trial Registration Data Set                                                                                                                   | NA (in main protocol) |
| Protocol version                                        | <a href="#">#3</a>  | Date and version identifier                                                                                                                                                                | NA (in main protocol) |
| Funding                                                 | <a href="#">#4</a>  | Sources and types of financial, material, and other support                                                                                                                                | 16                    |
| Roles and responsibilities: contributorship             | <a href="#">#5a</a> | Names, affiliations, and roles of protocol contributors                                                                                                                                    | 16                    |
| Roles and responsibilities: sponsor contact information | <a href="#">#5b</a> | Name and contact information for the trial sponsor                                                                                                                                         | NA (in main protocol) |
| Roles and responsibilities: sponsor and funder          | <a href="#">#5c</a> | Role of study sponsor and funders, if any, in study design; collection, management, analysis, and interpretation of data; writing of the report; and the decision to submit the report for | 16                    |

publication, including whether they will have ultimate authority over any of these activities

Roles and responsibilities: committees [#5d](#) Composition, roles, and responsibilities of the coordinating centre, steering committee, endpoint adjudication committee, data management team, and other individuals or groups overseeing the trial, if applicable (see Item 21a for data monitoring committee) NA (in main protocol)

## Introduction

Background and rationale [#6a](#) Description of research question and justification for undertaking the trial, including summary of relevant studies (published and unpublished) examining benefits and harms for each intervention 4

Background and rationale: choice of comparators [#6b](#) Explanation for choice of comparators 4

Objectives [#7](#) Specific objectives or hypotheses 4

Trial design [#8](#) Description of trial design including type of trial (eg, parallel group, crossover, factorial, single group), allocation ratio, and framework (eg, superiority, equivalence, non-inferiority, exploratory) 4

## Methods: Participants, interventions, and outcomes

Study setting [#9](#) Description of study settings (eg, community clinic, academic hospital) and list of countries where data will be collected. Reference to where list of study sites can be obtained 5

Eligibility criteria [#10](#) Inclusion and exclusion criteria for participants. If applicable, eligibility criteria for study centres and individuals who will perform the interventions (eg, surgeons, psychotherapists) Table 1

Interventions: description [#11a](#) Interventions for each group with sufficient detail to allow replication, including how and when they will be administered 6

|    |                              |                      |                                                                    |             |
|----|------------------------------|----------------------|--------------------------------------------------------------------|-------------|
| 1  | Interventions:               | <a href="#">#11b</a> | Criteria for discontinuing or modifying allocated interventions    | NA (in      |
| 2  | modifications                |                      | for a given trial participant (eg, drug dose change in response to | main        |
| 3  |                              |                      | harms, participant request, or improving / worsening disease)      | protocol)   |
| 4  |                              |                      |                                                                    |             |
| 5  |                              |                      |                                                                    |             |
| 6  | Interventions:               | <a href="#">#11c</a> | Strategies to improve adherence to intervention protocols, and     | NA (in      |
| 7  | adherence                    |                      | any procedures for monitoring adherence (eg, drug tablet           | main        |
| 8  |                              |                      | return; laboratory tests)                                          | protocol)   |
| 9  |                              |                      |                                                                    |             |
| 10 |                              |                      |                                                                    |             |
| 11 | Interventions:               | <a href="#">#11d</a> | Relevant concomitant care and interventions that are permitted     | 5           |
| 12 | concomitant care             |                      | or prohibited during the trial                                     |             |
| 13 |                              |                      |                                                                    |             |
| 14 |                              |                      |                                                                    |             |
| 15 | Outcomes                     | <a href="#">#12</a>  | Primary, secondary, and other outcomes, including the specific     | 6-7         |
| 16 |                              |                      | measurement variable (eg, systolic blood pressure), analysis       |             |
| 17 |                              |                      | metric (eg, change from baseline, final value, time to event),     |             |
| 18 |                              |                      | method of aggregation (eg, median, proportion), and time point     |             |
| 19 |                              |                      | for each outcome. Explanation of the clinical relevance of         |             |
| 20 |                              |                      | chosen efficacy and harm outcomes is strongly recommended          |             |
| 21 |                              |                      |                                                                    |             |
| 22 |                              |                      |                                                                    |             |
| 23 |                              |                      |                                                                    |             |
| 24 |                              |                      |                                                                    |             |
| 25 | Participant timeline         | <a href="#">#13</a>  | Time schedule of enrolment, interventions (including any run-      | 6, Figure 1 |
| 26 |                              |                      | ins and washouts), assessments, and visits for participants. A     |             |
| 27 |                              |                      | schematic diagram is highly recommended (see Figure)               |             |
| 28 |                              |                      |                                                                    |             |
| 29 |                              |                      |                                                                    |             |
| 30 | Sample size                  | <a href="#">#14</a>  | Estimated number of participants needed to achieve study           | 5           |
| 31 |                              |                      | objectives and how it was determined, including clinical and       |             |
| 32 |                              |                      | statistical assumptions supporting any sample size calculations    |             |
| 33 |                              |                      |                                                                    |             |
| 34 |                              |                      |                                                                    |             |
| 35 |                              |                      |                                                                    |             |
| 36 | Recruitment                  | <a href="#">#15</a>  | Strategies for achieving adequate participant enrolment to reach   | 5           |
| 37 |                              |                      | target sample size                                                 |             |
| 38 |                              |                      |                                                                    |             |
| 39 |                              |                      |                                                                    |             |
| 40 | <b>Methods: Assignment</b>   |                      |                                                                    |             |
| 41 | <b>of interventions (for</b> |                      |                                                                    |             |
| 42 | <b>controlled trials)</b>    |                      |                                                                    |             |
| 43 |                              |                      |                                                                    |             |
| 44 |                              |                      |                                                                    |             |
| 45 | Allocation: sequence         | <a href="#">#16a</a> | Method of generating the allocation sequence (eg, computer-        | 5           |
| 46 | generation                   |                      | generated random numbers), and list of any factors for             |             |
| 47 |                              |                      | stratification. To reduce predictability of a random sequence,     |             |
| 48 |                              |                      | details of any planned restriction (eg, blocking) should be        |             |
| 49 |                              |                      | provided in a separate document that is unavailable to those       |             |
| 50 |                              |                      | who enrol participants or assign interventions                     |             |
| 51 |                              |                      |                                                                    |             |
| 52 |                              |                      |                                                                    |             |
| 53 |                              |                      |                                                                    |             |
| 54 |                              |                      |                                                                    |             |
| 55 | Allocation                   | <a href="#">#16b</a> | Mechanism of implementing the allocation sequence (eg,             | 5           |
| 56 | concealment                  |                      | central telephone; sequentially numbered, opaque, sealed           |             |
| 57 | mechanism                    |                      |                                                                    |             |
| 58 |                              |                      |                                                                    |             |
| 59 |                              |                      |                                                                    |             |
| 60 |                              |                      |                                                                    |             |



envelopes), describing any steps to conceal the sequence until interventions are assigned

|    |                        |                      |                                                                   |
|----|------------------------|----------------------|-------------------------------------------------------------------|
| 1  |                        |                      |                                                                   |
| 2  |                        |                      |                                                                   |
| 3  |                        |                      |                                                                   |
| 4  | Allocation:            | <a href="#">#16c</a> | Who will generate the allocation sequence, who will enrol         |
| 5  | implementation         |                      | participants, and who will assign participants to interventions   |
| 6  |                        |                      |                                                                   |
| 7  |                        |                      | NA (in                                                            |
| 8  |                        |                      | main                                                              |
| 9  | Blinding (masking)     | <a href="#">#17a</a> | Who will be blinded after assignment to interventions (eg, trial  |
| 10 |                        |                      | participants, care providers, outcome assessors, data analysts),  |
| 11 |                        |                      | and how                                                           |
| 12 |                        |                      |                                                                   |
| 13 |                        |                      | 5                                                                 |
| 14 | Blinding (masking):    | <a href="#">#17b</a> | If blinded, circumstances under which unblinding is               |
| 15 | emergency unblinding   |                      | permissible, and procedure for revealing a participant's          |
| 16 |                        |                      | allocated intervention during the trial                           |
| 17 |                        |                      |                                                                   |
| 18 |                        |                      | 5                                                                 |
| 19 |                        |                      |                                                                   |
| 20 | <b>Methods: Data</b>   |                      |                                                                   |
| 21 | <b>collection,</b>     |                      |                                                                   |
| 22 | <b>management, and</b> |                      |                                                                   |
| 23 | <b>analysis</b>        |                      |                                                                   |
| 24 |                        |                      |                                                                   |
| 25 |                        |                      |                                                                   |
| 26 | Data collection plan   | <a href="#">#18a</a> | Plans for assessment and collection of outcome, baseline, and     |
| 27 |                        |                      | other trial data, including any related processes to promote data |
| 28 |                        |                      | quality (eg, duplicate measurements, training of assessors) and   |
| 29 |                        |                      | a description of study instruments (eg, questionnaires,           |
| 30 |                        |                      | laboratory tests) along with their reliability and validity, if   |
| 31 |                        |                      | known. Reference to where data collection forms can be found,     |
| 32 |                        |                      | if not in the protocol                                            |
| 33 |                        |                      |                                                                   |
| 34 |                        |                      | 6                                                                 |
| 35 |                        |                      |                                                                   |
| 36 |                        |                      |                                                                   |
| 37 |                        |                      |                                                                   |
| 38 | Data collection plan:  | <a href="#">#18b</a> | Plans to promote participant retention and complete follow-up,    |
| 39 | retention              |                      | including list of any outcome data to be collected for            |
| 40 |                        |                      | participants who discontinue or deviate from intervention         |
| 41 |                        |                      | protocols                                                         |
| 42 |                        |                      |                                                                   |
| 43 |                        |                      | NA (in                                                            |
| 44 |                        |                      | main                                                              |
| 45 | Data management        | <a href="#">#19</a>  | Plans for data entry, coding, security, and storage, including    |
| 46 |                        |                      | any related processes to promote data quality (eg, double data    |
| 47 |                        |                      | entry; range checks for data values). Reference to where details  |
| 48 |                        |                      | of data management procedures can be found, if not in the         |
| 49 |                        |                      | protocol                                                          |
| 50 |                        |                      |                                                                   |
| 51 |                        |                      | NA (in                                                            |
| 52 |                        |                      | main                                                              |
| 53 | Statistics: outcomes   | <a href="#">#20a</a> | Statistical methods for analysing primary and secondary           |
| 54 |                        |                      | outcomes. Reference to where other details of the statistical     |
| 55 |                        |                      | analysis plan can be found, if not in the protocol                |
| 56 |                        |                      |                                                                   |
| 57 |                        |                      | 8-9                                                               |
| 58 |                        |                      |                                                                   |
| 59 |                        |                      |                                                                   |
| 60 |                        |                      |                                                                   |

|    |                            |                      |                                                                    |           |
|----|----------------------------|----------------------|--------------------------------------------------------------------|-----------|
| 1  | Statistics: additional     | <a href="#">#20b</a> | Methods for any additional analyses (eg, subgroup and adjusted     | 8-9       |
| 2  | analyses                   |                      | analyses)                                                          |           |
| 3  |                            |                      |                                                                    |           |
| 4  |                            |                      |                                                                    |           |
| 5  | Statistics: analysis       | <a href="#">#20c</a> | Definition of analysis population relating to protocol non-        | 8-9       |
| 6  | population and             |                      | adherence (eg, as randomised analysis), and any statistical        |           |
| 7  | missing data               |                      | methods to handle missing data (eg, multiple imputation)           |           |
| 8  |                            |                      |                                                                    |           |
| 9  |                            |                      |                                                                    |           |
| 10 | <b>Methods: Monitoring</b> |                      |                                                                    |           |
| 11 |                            |                      |                                                                    |           |
| 12 | Data monitoring:           | <a href="#">#21a</a> | Composition of data monitoring committee (DMC); summary            | 8         |
| 13 | formal committee           |                      | of its role and reporting structure; statement of whether it is    |           |
| 14 |                            |                      | independent from the sponsor and competing interests; and          |           |
| 15 |                            |                      | reference to where further details about its charter can be found, |           |
| 16 |                            |                      | if not in the protocol. Alternatively, an explanation of why a     |           |
| 17 |                            |                      | DMC is not needed                                                  |           |
| 18 |                            |                      |                                                                    |           |
| 19 |                            |                      |                                                                    |           |
| 20 |                            |                      |                                                                    |           |
| 21 |                            |                      |                                                                    |           |
| 22 | Data monitoring:           | <a href="#">#21b</a> | Description of any interim analyses and stopping guidelines,       | 8         |
| 23 | interim analysis           |                      | including who will have access to these interim results and        |           |
| 24 |                            |                      | make the final decision to terminate the trial                     |           |
| 25 |                            |                      |                                                                    |           |
| 26 |                            |                      |                                                                    |           |
| 27 | Harms                      | <a href="#">#22</a>  | Plans for collecting, assessing, reporting, and managing           | 7         |
| 28 |                            |                      | solicited and spontaneously reported adverse events and other      |           |
| 29 |                            |                      | unintended effects of trial interventions or trial conduct         |           |
| 30 |                            |                      |                                                                    |           |
| 31 |                            |                      |                                                                    |           |
| 32 |                            |                      |                                                                    |           |
| 33 | Auditing                   | <a href="#">#23</a>  | Frequency and procedures for auditing trial conduct, if any, and   | NA (in    |
| 34 |                            |                      | whether the process will be independent from investigators and     | main      |
| 35 |                            |                      | the sponsor                                                        | protocol) |
| 36 |                            |                      |                                                                    |           |
| 37 |                            |                      |                                                                    |           |
| 38 | <b>Ethics and</b>          |                      |                                                                    |           |
| 39 | <b>dissemination</b>       |                      |                                                                    |           |
| 40 |                            |                      |                                                                    |           |
| 41 |                            |                      |                                                                    |           |
| 42 | Research ethics            | <a href="#">#24</a>  | Plans for seeking research ethics committee / institutional        | 9         |
| 43 | approval                   |                      | review board (REC / IRB) approval                                  |           |
| 44 |                            |                      |                                                                    |           |
| 45 |                            |                      |                                                                    |           |
| 46 | Protocol amendments        | <a href="#">#25</a>  | Plans for communicating important protocol modifications (eg,      | 9         |
| 47 |                            |                      | changes to eligibility criteria, outcomes, analyses) to relevant   |           |
| 48 |                            |                      | parties (eg, investigators, REC / IRBs, trial participants, trial  |           |
| 49 |                            |                      | registries, journals, regulators)                                  |           |
| 50 |                            |                      |                                                                    |           |
| 51 |                            |                      |                                                                    |           |
| 52 |                            |                      |                                                                    |           |
| 53 | Consent or assent          | <a href="#">#26a</a> | Who will obtain informed consent or assent from potential trial    | NA (in    |
| 54 |                            |                      | participants or authorised surrogates, and how (see Item 32)       | main      |
| 55 |                            |                      |                                                                    | protocol) |
| 56 |                            |                      |                                                                    |           |
| 57 |                            |                      |                                                                    |           |
| 58 |                            |                      |                                                                    |           |
| 59 |                            |                      |                                                                    |           |
| 60 |                            |                      |                                                                    |           |

|    |                          |                      |                                                                      |           |
|----|--------------------------|----------------------|----------------------------------------------------------------------|-----------|
| 1  | Consent or assent:       | <a href="#">#26b</a> | Additional consent provisions for collection and use of              | NA (in    |
| 2  | ancillary studies        |                      | participant data and biological specimens in ancillary studies, if   | main      |
| 3  |                          |                      | applicable                                                           | protocol) |
| 4  |                          |                      |                                                                      |           |
| 5  |                          |                      |                                                                      |           |
| 6  | Confidentiality          | <a href="#">#27</a>  | How personal information about potential and enrolled                | NA (in    |
| 7  |                          |                      | participants will be collected, shared, and maintained in order      | main      |
| 8  |                          |                      | to protect confidentiality before, during, and after the trial       | protocol) |
| 9  |                          |                      |                                                                      |           |
| 10 |                          |                      |                                                                      |           |
| 11 | Declaration of           | <a href="#">#28</a>  | Financial and other competing interests for principal                | 16        |
| 12 | interests                |                      | investigators for the overall trial and each study site              |           |
| 13 |                          |                      |                                                                      |           |
| 14 |                          |                      |                                                                      |           |
| 15 | Data access              | <a href="#">#29</a>  | Statement of who will have access to the final trial dataset, and    | NA (in    |
| 16 |                          |                      | disclosure of contractual agreements that limit such access for      | main      |
| 17 |                          |                      | investigators                                                        | protocol) |
| 18 |                          |                      |                                                                      |           |
| 19 |                          |                      |                                                                      |           |
| 20 | Ancillary and post trial | <a href="#">#30</a>  | Provisions, if any, for ancillary and post-trial care, and for       | NA (in    |
| 21 | care                     |                      | compensation to those who suffer harm from trial participation       | main      |
| 22 |                          |                      |                                                                      | protocol) |
| 23 |                          |                      |                                                                      |           |
| 24 |                          |                      |                                                                      |           |
| 25 |                          |                      |                                                                      |           |
| 26 | Dissemination policy:    | <a href="#">#31a</a> | Plans for investigators and sponsor to communicate trial results     | 9         |
| 27 | trial results            |                      | to participants, healthcare professionals, the public, and other     |           |
| 28 |                          |                      | relevant groups (eg, via publication, reporting in results           |           |
| 29 |                          |                      | databases, or other data sharing arrangements), including any        |           |
| 30 |                          |                      | publication restrictions                                             |           |
| 31 |                          |                      |                                                                      |           |
| 32 |                          |                      |                                                                      |           |
| 33 |                          |                      |                                                                      |           |
| 34 | Dissemination policy:    | <a href="#">#31b</a> | Authorship eligibility guidelines and any intended use of            | NA (in    |
| 35 | authorship               |                      | professional writers                                                 | main      |
| 36 |                          |                      |                                                                      | protocol) |
| 37 |                          |                      |                                                                      |           |
| 38 |                          |                      |                                                                      |           |
| 39 | Dissemination policy:    | <a href="#">#31c</a> | Plans, if any, for granting public access to the full protocol,      | NA (in    |
| 40 | reproducible research    |                      | participant-level dataset, and statistical code                      | main      |
| 41 |                          |                      |                                                                      | protocol) |
| 42 |                          |                      |                                                                      |           |
| 43 |                          |                      |                                                                      |           |
| 44 |                          |                      |                                                                      |           |
| 45 | <b>Appendices</b>        |                      |                                                                      |           |
| 46 |                          |                      |                                                                      |           |
| 47 | Informed consent         | <a href="#">#32</a>  | Model consent form and other related documentation given to          | NA (in    |
| 48 | materials                |                      | participants and authorised surrogates                               | main      |
| 49 |                          |                      |                                                                      | protocol) |
| 50 |                          |                      |                                                                      |           |
| 51 |                          |                      |                                                                      |           |
| 52 | Biological specimens     | <a href="#">#33</a>  | Plans for collection, laboratory evaluation, and storage of          | NA (in    |
| 53 |                          |                      | biological specimens for genetic or molecular analysis in the        | main      |
| 54 |                          |                      | current trial and for future use in ancillary studies, if applicable | protocol) |
| 55 |                          |                      |                                                                      |           |
| 56 |                          |                      |                                                                      |           |
| 57 |                          |                      |                                                                      |           |

Notes:

- 1 • 2b: NA (in main protocol)
- 2
- 3 • 3: NA (in main protocol)
- 4
- 5 • 5b: NA (in main protocol)
- 6
- 7 • 5d: NA (in main protocol)
- 8
- 9 • 11b: NA (in main protocol)
- 10
- 11 • 11c: NA (in main protocol)
- 12
- 13
- 14 • 13: 6, Figure 1
- 15
- 16 • 16c: NA (in main protocol)
- 17
- 18 • 18b: NA (in main protocol)
- 19
- 20
- 21 • 19: NA (in main protocol)
- 22
- 23 • 23: NA (in main protocol)
- 24
- 25 • 26a: NA (in main protocol)
- 26
- 27 • 26b: NA (in main protocol)
- 28
- 29 • 27: NA (in main protocol)
- 30
- 31 • 29: NA (in main protocol)
- 32
- 33 • 30: NA (in main protocol)
- 34
- 35 • 31b: NA (in main protocol)
- 36
- 37 • 31c: NA (in main protocol)
- 38
- 39 • 32: NA (in main protocol)
- 40
- 41
- 42 • 33: NA (in main protocol) The SPIRIT Explanation and Elaboration paper is distributed under the terms of
- 43
- 44 the Creative Commons Attribution License CC-BY-NC. This checklist was completed on 08. June 2021
- 45
- 46 using <https://www.goodreports.org/>, a tool made by the [EQUATOR Network](#) in collaboration with
- 47
- 48 [Penelope.ai](#)
- 49
- 50
- 51
- 52
- 53
- 54
- 55
- 56
- 57
- 58
- 59
- 60



STANDARD PROTOCOL ITEMS: RECOMMENDATIONS FOR INTERVENTIONAL TRIALS

SPIRIT 2013 Checklist: Recommended items to address in a clinical trial protocol and related documents\*

| Section/item                      | Item No | Description                                                                                                                                                                                                                                                                              | Addressed on page number |
|-----------------------------------|---------|------------------------------------------------------------------------------------------------------------------------------------------------------------------------------------------------------------------------------------------------------------------------------------------|--------------------------|
| <b>Administrative information</b> |         |                                                                                                                                                                                                                                                                                          |                          |
| Title                             | 1       | Descriptive title identifying the study design, population, interventions, and, if applicable, trial acronym                                                                                                                                                                             | 1                        |
| Trial registration                | 2a      | Trial identifier and registry name. If not yet registered, name of intended registry                                                                                                                                                                                                     | 1                        |
|                                   | 2b      | All items from the World Health Organization Trial Registration Data Set                                                                                                                                                                                                                 | 9                        |
| Protocol version                  | 3       | Date and version identifier                                                                                                                                                                                                                                                              | 5 (footer for all)       |
| Funding                           | 4       | Sources and types of financial, material, and other support                                                                                                                                                                                                                              | 1                        |
| Roles and responsibilities        | 5a      | Names, affiliations, and roles of protocol contributors                                                                                                                                                                                                                                  | 55                       |
|                                   | 5b      | Name and contact information for the trial sponsor                                                                                                                                                                                                                                       | 1                        |
|                                   | 5c      | Role of study sponsor and funders, if any, in study design; collection, management, analysis, and interpretation of data; writing of the report; and the decision to submit the report for publication, including whether they will have ultimate authority over any of these activities | 56                       |
|                                   | 5d      | Composition, roles, and responsibilities of the coordinating centre, steering committee, endpoint adjudication committee, data management team, and other individuals or groups overseeing the trial, if applicable (see Item 21a for data monitoring committee)                         | 56-7                     |

1 **Introduction**

2

3 Background and 6a Description of research question and justification for undertaking the trial, including summary of relevant 11-18  
4 rationale studies (published and unpublished) examining benefits and harms for each intervention  
5

6 6b Explanation for choice of comparators 14  
7

8 Objectives 7 Specific objectives or hypotheses 19  
9

10 Trial design 8 Description of trial design including type of trial (eg, parallel group, crossover, factorial, single group),  
11 allocation ratio, and framework (eg, superiority, equivalence, noninferiority, exploratory) 19  
12  
13

14 **Methods: Participants, interventions, and outcomes**

15

16 Study setting 9 Description of study settings (eg, community clinic, academic hospital) and list of countries where data will 20  
17 be collected. Reference to where list of study sites can be obtained  
18

19 Eligibility criteria 10 Inclusion and exclusion criteria for participants. If applicable, eligibility criteria for study centres and 21  
20 individuals who will perform the interventions (eg, surgeons, psychotherapists)  
21

22 Interventions 11a Interventions for each group with sufficient detail to allow replication, including how and when they will be 22  
23 administered  
24

25 11b Criteria for discontinuing or modifying allocated interventions for a given trial participant (eg, drug dose 23  
26 change in response to harms, participant request, or improving/worsening disease)  
27

28 11c Strategies to improve adherence to intervention protocols, and any procedures for monitoring adherence 24  
29 (eg, drug tablet return, laboratory tests)  
30

31 11d Relevant concomitant care and interventions that are permitted or prohibited during the trial 24  
32  
33

34 Outcomes 12 Primary, secondary, and other outcomes, including the specific measurement variable (eg, systolic blood  
35 pressure), analysis metric (eg, change from baseline, final value, time to event), method of aggregation (eg, 25  
36 median, proportion), and time point for each outcome. Explanation of the clinical relevance of chosen  
37 efficacy and harm outcomes is strongly recommended  
38  
39

40 Participant timeline 13 Time schedule of enrolment, interventions (including any run-ins and washouts), assessments, and visits for 26  
41 participants. A schematic diagram is highly recommended (see Figure)  
42  
43

|   |             |    |                                                                                                                                                                                       |    |
|---|-------------|----|---------------------------------------------------------------------------------------------------------------------------------------------------------------------------------------|----|
| 1 | Sample size | 14 | Estimated number of participants needed to achieve study objectives and how it was determined, including clinical and statistical assumptions supporting any sample size calculations | 31 |
| 2 |             |    |                                                                                                                                                                                       |    |
| 3 |             |    |                                                                                                                                                                                       |    |
| 4 | Recruitment | 15 | Strategies for achieving adequate participant enrolment to reach target sample size                                                                                                   | 31 |
| 5 |             |    |                                                                                                                                                                                       |    |

## 6 **Methods: Assignment of interventions (for controlled trials)**

### 7 Allocation:

|    |                                  |     |                                                                                                                                                                                                                                                                                                                                                          |    |
|----|----------------------------------|-----|----------------------------------------------------------------------------------------------------------------------------------------------------------------------------------------------------------------------------------------------------------------------------------------------------------------------------------------------------------|----|
| 10 | Sequence generation              | 16a | Method of generating the allocation sequence (eg, computer-generated random numbers), and list of any factors for stratification. To reduce predictability of a random sequence, details of any planned restriction (eg, blocking) should be provided in a separate document that is unavailable to those who enrol participants or assign interventions | 32 |
| 11 |                                  |     |                                                                                                                                                                                                                                                                                                                                                          |    |
| 12 |                                  |     |                                                                                                                                                                                                                                                                                                                                                          |    |
| 13 |                                  |     |                                                                                                                                                                                                                                                                                                                                                          |    |
| 14 |                                  |     |                                                                                                                                                                                                                                                                                                                                                          |    |
| 15 |                                  |     |                                                                                                                                                                                                                                                                                                                                                          |    |
| 16 | Allocation concealment mechanism | 16b | Mechanism of implementing the allocation sequence (eg, central telephone; sequentially numbered, opaque, sealed envelopes), describing any steps to conceal the sequence until interventions are assigned                                                                                                                                                | 33 |
| 17 |                                  |     |                                                                                                                                                                                                                                                                                                                                                          |    |
| 18 |                                  |     |                                                                                                                                                                                                                                                                                                                                                          |    |
| 19 |                                  |     |                                                                                                                                                                                                                                                                                                                                                          |    |
| 20 | Implementation                   | 16c | Who will generate the allocation sequence, who will enrol participants, and who will assign participants to interventions                                                                                                                                                                                                                                | 33 |
| 21 |                                  |     |                                                                                                                                                                                                                                                                                                                                                          |    |
| 22 |                                  |     |                                                                                                                                                                                                                                                                                                                                                          |    |
| 23 |                                  |     |                                                                                                                                                                                                                                                                                                                                                          |    |
| 24 | Blinding (masking)               | 17a | Who will be blinded after assignment to interventions (eg, trial participants, care providers, outcome assessors, data analysts), and how                                                                                                                                                                                                                | 33 |
| 25 |                                  |     |                                                                                                                                                                                                                                                                                                                                                          |    |
| 26 |                                  |     |                                                                                                                                                                                                                                                                                                                                                          |    |
| 27 |                                  | 17b | If blinded, circumstances under which unblinding is permissible, and procedure for revealing a participant's allocated intervention during the trial                                                                                                                                                                                                     | 34 |
| 28 |                                  |     |                                                                                                                                                                                                                                                                                                                                                          |    |
| 29 |                                  |     |                                                                                                                                                                                                                                                                                                                                                          |    |
| 30 |                                  |     |                                                                                                                                                                                                                                                                                                                                                          |    |

## 31 **Methods: Data collection, management, and analysis**

|    |                         |     |                                                                                                                                                                                                                                                                                                                                                                                                              |    |
|----|-------------------------|-----|--------------------------------------------------------------------------------------------------------------------------------------------------------------------------------------------------------------------------------------------------------------------------------------------------------------------------------------------------------------------------------------------------------------|----|
| 33 | Data collection methods | 18a | Plans for assessment and collection of outcome, baseline, and other trial data, including any related processes to promote data quality (eg, duplicate measurements, training of assessors) and a description of study instruments (eg, questionnaires, laboratory tests) along with their reliability and validity, if known. Reference to where data collection forms can be found, if not in the protocol | 34 |
| 34 |                         |     |                                                                                                                                                                                                                                                                                                                                                                                                              |    |
| 35 |                         |     |                                                                                                                                                                                                                                                                                                                                                                                                              |    |
| 36 |                         |     |                                                                                                                                                                                                                                                                                                                                                                                                              |    |
| 37 |                         |     |                                                                                                                                                                                                                                                                                                                                                                                                              |    |
| 38 |                         |     |                                                                                                                                                                                                                                                                                                                                                                                                              |    |
| 39 |                         | 18b | Plans to promote participant retention and complete follow-up, including list of any outcome data to be collected for participants who discontinue or deviate from intervention protocols                                                                                                                                                                                                                    | 37 |
| 40 |                         |     |                                                                                                                                                                                                                                                                                                                                                                                                              |    |
| 41 |                         |     |                                                                                                                                                                                                                                                                                                                                                                                                              |    |
| 42 |                         |     |                                                                                                                                                                                                                                                                                                                                                                                                              |    |

|    |                                 |     |                                                                                                                                                                                                                                                                                                                                       |    |
|----|---------------------------------|-----|---------------------------------------------------------------------------------------------------------------------------------------------------------------------------------------------------------------------------------------------------------------------------------------------------------------------------------------|----|
| 1  | Data management                 | 19  | Plans for data entry, coding, security, and storage, including any related processes to promote data quality (eg, double data entry; range checks for data values). Reference to where details of data management procedures can be found, if not in the protocol                                                                     | 38 |
| 2  |                                 |     |                                                                                                                                                                                                                                                                                                                                       |    |
| 3  |                                 |     |                                                                                                                                                                                                                                                                                                                                       |    |
| 4  |                                 |     |                                                                                                                                                                                                                                                                                                                                       |    |
| 5  | Statistical methods             | 20a | Statistical methods for analysing primary and secondary outcomes. Reference to where other details of the statistical analysis plan can be found, if not in the protocol                                                                                                                                                              | 40 |
| 6  |                                 |     |                                                                                                                                                                                                                                                                                                                                       |    |
| 7  |                                 |     |                                                                                                                                                                                                                                                                                                                                       |    |
| 8  |                                 | 20b | Methods for any additional analyses (eg, subgroup and adjusted analyses)                                                                                                                                                                                                                                                              | 41 |
| 9  |                                 |     |                                                                                                                                                                                                                                                                                                                                       |    |
| 10 |                                 | 20c | Definition of analysis population relating to protocol non-adherence (eg, as randomised analysis), and any statistical methods to handle missing data (eg, multiple imputation)                                                                                                                                                       | 40 |
| 11 |                                 |     |                                                                                                                                                                                                                                                                                                                                       |    |
| 12 |                                 |     |                                                                                                                                                                                                                                                                                                                                       |    |
| 13 |                                 |     |                                                                                                                                                                                                                                                                                                                                       |    |
| 14 | <b>Methods: Monitoring</b>      |     |                                                                                                                                                                                                                                                                                                                                       |    |
| 15 |                                 |     |                                                                                                                                                                                                                                                                                                                                       |    |
| 16 | Data monitoring                 | 21a | Composition of data monitoring committee (DMC); summary of its role and reporting structure; statement of whether it is independent from the sponsor and competing interests; and reference to where further details about its charter can be found, if not in the protocol. Alternatively, an explanation of why a DMC is not needed | 43 |
| 17 |                                 |     |                                                                                                                                                                                                                                                                                                                                       |    |
| 18 |                                 |     |                                                                                                                                                                                                                                                                                                                                       |    |
| 19 |                                 |     |                                                                                                                                                                                                                                                                                                                                       |    |
| 20 |                                 |     |                                                                                                                                                                                                                                                                                                                                       |    |
| 21 |                                 |     |                                                                                                                                                                                                                                                                                                                                       |    |
| 22 |                                 | 21b | Description of any interim analyses and stopping guidelines, including who will have access to these interim results and make the final decision to terminate the trial                                                                                                                                                               | 43 |
| 23 |                                 |     |                                                                                                                                                                                                                                                                                                                                       |    |
| 24 |                                 |     |                                                                                                                                                                                                                                                                                                                                       |    |
| 25 | Harms                           | 22  | Plans for collecting, assessing, reporting, and managing solicited and spontaneously reported adverse events and other unintended effects of trial interventions or trial conduct                                                                                                                                                     | 44 |
| 26 |                                 |     |                                                                                                                                                                                                                                                                                                                                       |    |
| 27 |                                 |     |                                                                                                                                                                                                                                                                                                                                       |    |
| 28 | Auditing                        | 23  | Frequency and procedures for auditing trial conduct, if any, and whether the process will be independent from investigators and the sponsor                                                                                                                                                                                           | 47 |
| 29 |                                 |     |                                                                                                                                                                                                                                                                                                                                       |    |
| 30 |                                 |     |                                                                                                                                                                                                                                                                                                                                       |    |
| 31 |                                 |     |                                                                                                                                                                                                                                                                                                                                       |    |
| 32 | <b>Ethics and dissemination</b> |     |                                                                                                                                                                                                                                                                                                                                       |    |
| 33 |                                 |     |                                                                                                                                                                                                                                                                                                                                       |    |
| 34 | Research ethics approval        | 24  | Plans for seeking research ethics committee/institutional review board (REC/IRB) approval                                                                                                                                                                                                                                             | 48 |
| 35 |                                 |     |                                                                                                                                                                                                                                                                                                                                       |    |
| 36 |                                 |     |                                                                                                                                                                                                                                                                                                                                       |    |
| 37 | Protocol amendments             | 25  | Plans for communicating important protocol modifications (eg, changes to eligibility criteria, outcomes, analyses) to relevant parties (eg, investigators, REC/IRBs, trial participants, trial registries, journals, regulators)                                                                                                      | 48 |
| 38 |                                 |     |                                                                                                                                                                                                                                                                                                                                       |    |
| 39 |                                 |     |                                                                                                                                                                                                                                                                                                                                       |    |
| 40 |                                 |     |                                                                                                                                                                                                                                                                                                                                       |    |
| 41 |                                 |     |                                                                                                                                                                                                                                                                                                                                       |    |
| 42 |                                 |     |                                                                                                                                                                                                                                                                                                                                       |    |



|    |                               |     |                                                                                                                                                                                                                                                                                     |    |
|----|-------------------------------|-----|-------------------------------------------------------------------------------------------------------------------------------------------------------------------------------------------------------------------------------------------------------------------------------------|----|
| 1  | Consent or assent             | 26a | Who will obtain informed consent or assent from potential trial participants or authorised surrogates, and how (see Item 32)                                                                                                                                                        | 49 |
| 2  |                               |     |                                                                                                                                                                                                                                                                                     |    |
| 3  |                               |     |                                                                                                                                                                                                                                                                                     |    |
| 4  |                               | 26b | Additional consent provisions for collection and use of participant data and biological specimens in ancillary studies, if applicable                                                                                                                                               | 50 |
| 5  |                               |     |                                                                                                                                                                                                                                                                                     |    |
| 6  |                               |     |                                                                                                                                                                                                                                                                                     |    |
| 7  | Confidentiality               | 27  | How personal information about potential and enrolled participants will be collected, shared, and maintained in order to protect confidentiality before, during, and after the trial                                                                                                | 51 |
| 8  |                               |     |                                                                                                                                                                                                                                                                                     |    |
| 9  |                               |     |                                                                                                                                                                                                                                                                                     |    |
| 10 | Declaration of interests      | 28  | Financial and other competing interests for principal investigators for the overall trial and each study site                                                                                                                                                                       | 51 |
| 11 |                               |     |                                                                                                                                                                                                                                                                                     |    |
| 12 |                               |     |                                                                                                                                                                                                                                                                                     |    |
| 13 | Access to data                | 29  | Statement of who will have access to the final trial dataset, and disclosure of contractual agreements that limit such access for investigators                                                                                                                                     | 52 |
| 14 |                               |     |                                                                                                                                                                                                                                                                                     |    |
| 15 |                               |     |                                                                                                                                                                                                                                                                                     |    |
| 16 | Ancillary and post-trial care | 30  | Provisions, if any, for ancillary and post-trial care, and for compensation to those who suffer harm from trial participation                                                                                                                                                       | 52 |
| 17 |                               |     |                                                                                                                                                                                                                                                                                     |    |
| 18 |                               |     |                                                                                                                                                                                                                                                                                     |    |
| 19 |                               |     |                                                                                                                                                                                                                                                                                     |    |
| 20 | Dissemination policy          | 31a | Plans for investigators and sponsor to communicate trial results to participants, healthcare professionals, the public, and other relevant groups (eg, via publication, reporting in results databases, or other data sharing arrangements), including any publication restrictions | 53 |
| 21 |                               |     |                                                                                                                                                                                                                                                                                     |    |
| 22 |                               |     |                                                                                                                                                                                                                                                                                     |    |
| 23 |                               |     |                                                                                                                                                                                                                                                                                     |    |
| 24 |                               | 31b | Authorship eligibility guidelines and any intended use of professional writers                                                                                                                                                                                                      | 53 |
| 25 |                               |     |                                                                                                                                                                                                                                                                                     |    |
| 26 |                               | 31c | Plans, if any, for granting public access to the full protocol, participant-level dataset, and statistical code                                                                                                                                                                     | 53 |
| 27 |                               |     |                                                                                                                                                                                                                                                                                     |    |
| 28 |                               |     |                                                                                                                                                                                                                                                                                     |    |
| 29 | <b>Appendices</b>             |     |                                                                                                                                                                                                                                                                                     |    |
| 30 |                               |     |                                                                                                                                                                                                                                                                                     |    |
| 31 | Informed consent materials    | 32  | Model consent form and other related documentation given to participants and authorised surrogates                                                                                                                                                                                  | 57 |
| 32 |                               |     |                                                                                                                                                                                                                                                                                     |    |
| 33 |                               |     |                                                                                                                                                                                                                                                                                     |    |
| 34 | Biological specimens          | 33  | Plans for collection, laboratory evaluation, and storage of biological specimens for genetic or molecular analysis in the current trial and for future use in ancillary studies, if applicable                                                                                      | 58 |
| 35 |                               |     |                                                                                                                                                                                                                                                                                     |    |
| 36 |                               |     |                                                                                                                                                                                                                                                                                     |    |

37 \*It is strongly recommended that this checklist be read in conjunction with the SPIRIT 2013 Explanation & Elaboration for important clarification on the items.  
 38 Amendments to the protocol should be tracked and dated. The SPIRIT checklist is copyrighted by the SPIRIT Group under the Creative Commons  
 39 “[Attribution-NonCommercial-NoDerivs 3.0 Unported](https://creativecommons.org/licenses/by-nc-nd/3.0/)” license.  
 40  
 41  
 42
